# Supplementary material for: Metabolomics analysis reveals a potential role SARS-CoV-2 viral proteins in the regulation/perturbation of metabolic pathways associated with altered plasma metabolites in COVID-19 patients
Source: Research Square preprint supplement (doi:10.21203/rs.3.rs-1707562/v1), 2022-06-24
Supplement: Supplementary file 2 [file fcbe4665bb0999725f879df9.xlsx]

## Sheet: Лист1
62.9205	M	F	M	F	F	M	M	F	F	M	F	F	F	F	M	M	M	F	M	F	M	M	M	M	F	F	F	M	M	F	M	M	F	M	F	M	F	F	M	M	F	F	F	F	M	M	F	M	M
75.9216	69	76	69	82	66	63	66	68	83	69	76	59	70	69	73	70	61	69	61	74	66	66	73	79	67	71	70	65	66	68	66	70	68	66	74	66	73	72	75	72	71	65	72	71	65	67	70	68	70
	patients																			control
	1	2	3	4	5	6	7	8	9	10	11	12	13	14	15	16	17	18	19	1	2	3	4	5	6	7	8	9	10	11	12	13	14	15	16	17	18	19	20	21	22	23	24	25	26	27	28	29	30
Sample/metabolite Name	CoV 108	CoV 16	CoV 32	CoV 415	CoV 40	CoV 119	CoV 235	CoV 284	CoV 248	CoV 37	CoV 264	CoV 100	CoV 83	CoV 282	CoV 218	CoV 228	CoV 283	CoV 91	CoV 266	15	40	52	64	75	83	89	98	102	18	22	25	28	30	36	38	43	46	48	49	53	56	70	71	78	87	91	95	100	103
Mevalonolactone	6.44943	6.50218	6.43096	6.37067	6.46778	6.3575	6.45408	6.38334	6.42859	6.4156	6.44421	6.45885	6.41803	6.40939	6.44013	6.49169	6.37976	6.48002	6.437	4.84106	5.09258	4.86137	4.72031	4.67337	4.78293	4.83477	4.75768	4.84794	4.87582	4.91855	4.66503	4.86312	4.73616	4.99922	4.84592	4.88594	5.00461	4.71382	4.86137	4.84288	4.82886	4.82266	4.86147	4.79332	4.76557	4.84417	4.77788	4.75884	4.77643
inositol	5.76308	5.83737	5.84244	5.75148	5.78111	5.77334	5.79176	5.78426	5.80281	5.82795	5.8274	5.76738	5.83932	5.75188	5.81899	5.78309	5.66231	5.79542	5.74121	4.39402	3.74777	4.28946	4.6266	4.33475	4.37326	4.40237	4.36649	4.35722	4.08689	4.32158	4.53967	4.3501	4.01549	4.10297	4.10439	4.08919	4.65206	4.20682	4.44288	4.34613	4.1241	4.54106	4.23474	4.52457	3.9041	4.17123	4.20037	4.34378	4.34492
L-Dihydroorotic acid_neg	6.3747	6.34114	6.31396	6.31947	6.41242	6.40491	6.36793	6.38709	6.34862	6.36735	6.37575	6.34954	6.42659	6.32922	6.40352	6.29917	6.29307	6.44866	6.34979	5.13389	4.80463	5.20565	5.16758	4.90802	5.06723	5.14467	5.05767	5.04596	5.19055	5.13219	5.2365	5.28359	5.13618	5.18531	5.14806	5.15706	5.13242	5.05921	5.24838	5.1236	5.21397	5.22708	5.11296	5.08211	5.11786	5.11082	5.09991	5.08657	5.0727
5-methoxytryptophan (2)	5.93692	6.09742	6.00874	5.92229	5.85172	5.94335	5.97101	5.91213	5.96294	5.94127	5.97226	5.95782	5.96452	5.94354	5.97695	6.06814	5.86043	5.86285	5.92163	4.70938	4.93611	4.26318	4.49177	4.40456	4.42047	4.47118	4.41943	4.54085	4.5615	4.68689	4.56866	4.52605	4.51127	4.68803	4.46064	4.7449	4.4942	4.39964	4.47323	4.34825	4.52424	4.46728	4.49424	4.58684	4.37453	4.4054	4.35931	4.33736	4.42524
carnosine	6.67414	6.68417	6.63224	6.59515	6.63222	6.57403	6.65241	6.6188	6.69318	6.64742	6.63958	6.63206	6.64076	6.66336	6.65575	6.66329	6.64408	6.64867	6.62001	5.36945	5.63376	5.41399	5.26861	5.28857	5.18748	5.1977	5.28844	5.06695	5.32238	5.62984	5.11762	5.44784	5.22474	5.31349	5.32971	5.59596	5.267	5.12896	5.44036	5.35259	5.32243	5.36584	5.54704	5.20942	5.38069	5.41035	5.23808	5.25523	5.14901
aminoimidazole carboxamide ribonucleotide	7.31736	7.2201	7.24602	7.34923	7.35829	7.4018	7.27295	6.10158	7.41217	7.14705	7.36182	7.28429	7.22176	7.40735	7.36534	7.21999	7.43254	6.01239	7.33655	4.6298	4.55919	4.44881	4.60719	5.02776	4.10932	4.87169	4.98371	4.6869	4.7996	4.15842	4.24197	5.03356	4.78611	5.06848	3.89404	4.23302	4.37576	4.46232	5.21134	4.78083	4.25033	4.91391	4.56319	4.20647	4.42592	4.4798	5.00744	4.61549	4.63947
Imidazoleacetic acid	7.3286	7.34515	7.2642	7.31276	7.32736	7.30806	7.39985	7.28157	7.38428	7.35233	7.3545	7.34223	7.32375	7.32249	7.38546	7.3591	7.26617	7.39092	7.32055	5.95728	6.07859	5.98309	6.12564	5.94473	5.98364	6.05327	5.86298	5.88395	6.0223	6.00397	6.17411	6.1954	6.29585	6.11641	6.00077	6.30988	6.03709	6.18327	6.09015	6.06723	6.1213	6.22572	5.99533	6.00145	5.88566	5.9336	5.9224	5.99099	5.84679
cystathionine	6.36713	6.4323	6.41425	6.33596	6.37322	6.2301	6.44625	6.40111	6.36884	6.38153	6.43296	6.39433	6.35895	6.3474	6.40806	6.48428	6.35948	6.39351	6.36496	5.26383	5.07819	5.04777	4.85988	5.02786	4.91796	5.11429	5.15227	5.1137	5.15694	5.47767	5.30866	5.15657	4.92103	4.87536	5.1388	5.09942	5.45519	4.64173	4.73987	5.16651	5.15952	4.68579	4.90907	4.99909	5.09784	4.96821	4.98991	5.14263	4.97483
D-Sedoheptulose 7-phosphate (1)_neg	5.05238	5.07173	5.07918	5.05548	5.09508	5.11603	5.03042	5.05623	5.06589	5.11836	4.99477	5.06149	5.13742	5.07793	5.06877	4.94333	5.09553	5.06425	5.10043	4.2561	3.93392	4.14592	4.13856	4.15433	4.1668	4.05342	4.21016	4.18693	4.30889	4.29957	4.20833	4.26407	4.41999	4.27146	4.24316	4.11055	4.21032	4.04712	4.15215	4.08401	4.13235	3.92292	4.1072	4.25444	4.05906	4.14451	4.04685	4.18172	4.14109
suberic acid	5.99689	6.01638	5.90505	5.99908	6.00486	6.07122	6.02599	5.94775	6.04532	6.05086	6.03582	5.98654	6.05469	6.03287	6.05965	6.0299	5.93138	6.06721	6.02039	5.26173	5.2236	5.26187	5.05893	5.16506	5.08561	5.07081	5.21837	4.97354	5.14987	5.1163	5.13296	5.25759	5.20903	5.13099	5.34601	5.24567	5.34543	5.18804	5.24059	5.2218	5.10061	5.0456	5.0912	5.0224	5.11122	5.14402	5.24465	4.99782	5.04217
Methionine sulfoxide	5.78224	6.19043	6.17438	6.07569	5.90505	5.87823	5.74278	6.04205	5.90689	6.00201	5.87407	5.94479	5.71795	6.04141	5.81898	5.57701	5.96648	5.69764	5.87912	4.82731	4.85921	5.02407	4.75354	4.75352	4.67353	4.76532	4.85977	4.6833	4.88544	5.06652	4.94207	4.9153	4.9433	4.89396	5.00397	4.89578	4.83969	4.73494	4.83405	4.76452	4.82036	4.8926	4.69046	4.91043	4.78089	4.75297	4.56025	4.75261	4.92468
glucosamine	6.23394	6.32882	6.19389	6.20218	6.19606	5.9585	6.2843	6.16555	6.3111	6.34813	6.20355	6.23974	6.18438	6.25114	6.28912	6.36379	6.1062	6.17079	6.24018	5.41315	5.34458	5.29897	5.12441	5.05968	4.9457	5.05118	5.08099	5.2075	5.48247	5.50288	5.41538	5.36727	5.61216	5.26197	5.2657	5.18779	5.24591	5.24142	5.22245	5.09977	4.90585	5.05611	5.07502	5.07031	5.07785	5.06617	5.20981	5.19512	5.3176
L-Serine	5.9044	6.09995	6.2137	6.02489	6.18555	5.89578	6.15613	6.09145	6.13794	6.18981	6.1344	6.19721	5.97656	6.11173	6.18719	5.88655	6.18314	5.92202	6.18671	5.41724	5.57032	5.30918	5.32591	5.10826	5.28307	5.28731	5.10425	5.11065	5.36456	5.21999	5.41247	5.31907	5.35431	5.33301	5.35467	5.43536	5.26737	5.4585	5.3519	5.30315	5.21212	5.11332	5.21519	5.05002	5.2319	5.34514	5.10691	5.35013	5.32343
homovanillic acid_neg	5.63174	5.74753	5.66108	5.75498	5.64367	5.66866	5.73239	5.62938	5.73553	5.72561	5.75663	5.77554	5.63789	5.67682	5.84841	5.75593	5.59974	5.67779	5.63524	4.69565	4.32995	4.74182	5.30984	4.81376	4.70592	4.94585	4.76273	4.45415	4.52508	4.51141	4.84406	4.81559	4.99298	4.79759	4.64791	4.64038	5.12758	4.97975	5.18263	4.47483	4.47448	4.67865	4.77905	4.49472	3.79633	4.71639	4.67087	4.92321	4.89665
D-Glyceraldehyde 3-phosphate_neg	5.17812	5.20047	5.19186	5.10485	5.19837	5.30098	5.18007	5.26079	5.28286	5.10675	5.15791	5.28268	5.19863	5.15314	5.22812	5.25	5.14323	5.19497	5.16427	4.32304	4.08946	4.71433	4.46014	4.143	4.18335	4.60505	4.0681	4.07182	4.43769	4.45547	4.54201	4.67652	4.17717	4.46192	4.31246	4.508	4.47795	4.14892	4.27325	4.65459	4.53656	4.59282	4.14137	4.29849	4.38752	4.34269	4.18314	4.55948	4.85605
L-Homocysteic acid	5.71502	5.68629	5.73264	5.53665	5.63297	5.58123	5.67497	5.62778	5.7174	5.7406	5.73894	5.67427	5.64114	5.66423	5.74373	5.73431	5.53106	5.66196	5.65955	4.93377	5.10299	5.13394	4.9532	4.8646	4.86609	4.8647	4.95882	4.70486	5.07326	5.07727	5.25771	4.99473	5.32499	4.96507	5.08637	4.96746	5.03037	4.90559	5.01003	4.87975	4.92919	4.98554	4.89295	4.84527	4.9158	4.7845	4.69284	4.98032	5.06297
Phosphorylcholine	8.25247	8.12494	8.18431	8.03984	8.19682	8.24104	8.23935	8.23268	8.29883	8.17666	8.19023	8.2958	8.24849	8.15142	8.10167	8.19573	8.16221	8.279	8.17236	7.74107	7.38893	7.59269	7.52772	7.54112	7.51682	7.73862	7.73799	7.66089	7.74548	7.48718	7.53254	7.60677	7.71412	7.40633	7.53825	7.64896	7.4915	7.47895	7.78055	7.60753	7.56165	7.59072	7.42526	7.65107	7.64929	7.6358	7.57872	7.71781	7.80512
pyridoxine	6.27293	6.25812	6.58805	6.28202	6.39638	6.44276	6.32589	6.41901	6.34531	6.31795	6.33895	6.53988	6.27417	6.44328	6.41395	5.97324	6.40811	6.49953	6.36408	5.7063	5.40865	5.801	5.67157	5.26619	5.24297	5.63692	5.47448	5.50081	5.78417	5.70286	5.64865	5.76833	5.59825	5.61487	5.39078	5.43042	5.29807	5.28289	5.34039	5.64023	5.66361	5.54339	5.50789	5.26211	5.59522	5.48235	5.24962	5.52172	5.5428
L-Alpha-aminobutyric acid	6.54385	6.67592	6.66815	6.4945	6.69831	6.68445	6.64291	6.60239	6.62821	6.74394	6.70949	6.68011	6.61375	6.77634	6.67503	6.46253	6.51881	6.48927	6.67365	6.29782	6.14249	6.25884	6.22261	5.98289	5.9287	6.22447	5.91874	5.92784	6.25326	6.18801	6.2126	6.22362	6.2313	6.25045	6.07897	6.29508	6.03714	6.22921	6.22273	6.21102	6.20374	6.23972	6.14319	5.93203	6.10212	6.03535	5.90879	6.09293	6.19919
Orotic acid_neg	5.91578	5.91902	5.87431	5.84402	5.85726	5.75915	5.89322	5.84412	5.84649	5.92245	5.88026	5.88866	5.92272	5.83828	5.89364	5.85708	5.74087	5.9206	5.82133	5.38183	5.60733	5.38394	5.3133	5.26191	5.15954	5.39096	5.13409	5.27355	5.39132	5.30228	5.34329	5.38053	5.33727	5.34487	5.25837	5.27962	5.27712	5.2871	5.27994	5.25264	5.29587	5.31115	5.311	5.23726	5.20075	5.2781	5.22856	5.31297	5.2816
choline	7.76805	7.83477	7.96217	7.73354	7.94005	7.97448	7.94972	7.89395	7.86561	8.03588	7.99469	7.93695	7.859	7.97948	7.92816	7.61904	7.80042	7.7952	7.98449	7.4663	7.10378	7.33963	7.3619	7.04815	7.11177	7.44886	7.07162	7.08174	7.45223	7.40232	7.37741	7.41404	7.45399	7.4698	7.19373	7.43073	7.17577	7.32169	7.28632	7.35679	7.39446	7.4131	7.32019	7.10528	7.2402	7.19927	7.03327	7.19113	7.28893
L-Threonine	6.33836	6.17398	6.4925	6.32427	6.49551	6.37845	6.3822	6.42827	6.28816	6.36279	6.28449	6.39338	6.49127	6.36112	6.36364	6.18479	6.57977	6.18443	6.43698	5.79692	6.0602	5.81241	5.8973	5.70477	5.92109	5.84887	5.62374	5.7461	5.84667	5.80206	5.94827	5.95547	6.02426	5.80934	5.91859	5.83853	5.67148	5.89404	5.73904	5.76077	5.87372	5.76146	5.85297	5.61214	5.78903	5.88286	5.63937	5.91824	5.76949
purine	6.8386	6.68372	6.99244	6.82052	6.85125	6.93522	6.76606	7.00536	6.92404	6.73622	6.98492	6.94149	6.7423	6.92717	6.83762	6.86505	6.89893	6.68153	6.95792	6.36176	6.44459	6.51875	6.36965	6.2593	6.27523	6.26931	6.4543	6.22288	6.41458	6.58089	6.45727	6.45699	6.4886	6.47368	6.4785	6.45215	6.42124	6.39035	6.37879	6.29774	6.29712	6.43295	6.26529	6.45965	6.37037	6.28967	6.18722	6.26996	6.45412
aspartate	5.68901	5.98294	6.21774	6.13667	6.12824	5.81608	6.24434	5.87773	6.22108	6.14098	6.24929	6.30369	5.76278	6.03175	6.34858	5.42551	6.03642	5.90825	6.24386	5.32078	5.20789	5.28611	5.11041	5.06869	5.01699	5.19614	5.18472	5.18059	5.28397	5.27195	5.24668	5.2725	5.27131	5.30061	5.28082	5.33071	5.27779	5.33179	5.34432	5.23961	4.99244	5.1826	5.07821	5.08175	5.08065	5.17588	5.21729	5.16926	5.16236
5'-Methylthioadenosine	5.78382	5.54655	5.4594	5.83982	5.42515	5.91152	5.45961	5.60169	5.6205	5.40891	5.57754	5.42678	5.82508	5.87807	5.43221	5.52891	5.58791	5.61399	5.57791	4.80103	4.88777	5.25561	4.80443	4.77615	4.91276	4.97965	5.14585	4.99187	4.86287	5.19348	5.04376	5.11797	5.34201	5.01755	5.08215	4.84404	4.80724	5.14276	5.18582	4.86515	4.82873	5.1945	4.49869	4.63638	4.52275	4.44356	5.11772	4.84603	5.00313
dimethylglycine	6.53415	6.68177	6.67536	6.47559	6.70784	6.66706	6.64935	6.57953	6.63412	6.7493	6.71819	6.68254	6.63083	6.76548	6.70703	6.4379	6.50891	6.47391	6.67444	6.36096	6.24812	6.36796	6.29053	6.08815	6.03613	6.33903	6.0422	6.03242	6.34664	6.28006	6.29757	6.32472	6.32339	6.30447	6.19009	6.35322	6.16608	6.26845	6.28936	6.25141	6.30715	6.31491	6.23261	6.01144	6.21839	6.18649	6.02282	6.17149	6.26872
4-Hydroxybenzoic acid_neg	5.88107	6.70297	6.67029	5.90767	7.94706	5.93274	6.77752	5.82324	6.02622	7.71972	6.55859	6.24238	6.29977	5.88464	6.07008	6.96955	6.20571	5.82788	7.04247	4.71703	4.72857	5.0769	5.2206	5.77889	4.53502	5.13918	5.02728	5.59409	4.75418	5.21821	4.95909	5.52717	5.15471	4.90642	4.87793	5.12192	5.43947	5.0518	5.53105	4.63532	5.60205	5.22219	4.57867	4.76647	4.93349	4.7424	4.90863	5.33427	4.93606
Acetyllysine	6.32702	6.39076	6.28911	6.46525	6.35568	6.44546	6.1266	6.29844	6.18912	6.29688	6.31213	6.12363	6.40795	6.5323	6.29252	6.41919	6.35796	6.12452	6.40654	5.87744	6.0104	6.09379	5.91155	5.89865	6.07997	5.92585	5.92225	5.89877	6.00025	6.03	6.03297	6.06135	5.97512	5.87237	6.00452	6.02102	5.96052	5.94193	6.00621	5.91664	5.99937	5.97834	5.86271	5.90063	5.94887	5.93067	5.81999	5.9912	5.98132
taurine_neg	5.66708	6.05904	5.909	6.34576	6.10789	5.92637	6.10888	6.03998	6.10326	5.98671	6.1271	5.98742	6.02173	6.28566	6.18825	5.83073	6.28743	5.83529	6.11849	5.50719	5.63343	5.60874	5.55141	5.33324	5.46115	5.36651	5.00199	5.38997	5.47911	5.57822	5.49368	5.56528	5.48419	5.41816	5.39492	5.54082	5.36803	5.43433	5.28499	5.38537	5.60604	5.65917	5.54953	5.38047	5.28814	5.35535	5.21169	5.31377	5.23757
citric/Isocitric acid (2)_neg	5.47541	5.96283	5.74045	5.94006	5.64751	4.76424	6.21721	5.2298	5.8707	5.02463	5.41401	5.04652	5.08363	5.74822	5.48095	6.10281	5.28086	4.94227	5.75961	7.34122	7.17883	6.99255	7.02715	6.70962	6.92728	6.95776	7.07729	7.02009	7.07542	7.1255	7.08912	7.15977	7.14828	7.08241	7.13339	7.09359	7.00577	7.1897	7.12724	7.01889	6.99983	7.08113	6.99444	6.85074	6.87273	6.93	6.96591	7.02214	7.06261
IMP_neg	4.09524	3.9288	4.09102	3.88267	4.23791	4.01769	3.99821	3.98946	3.85607	4.03815	3.80769	3.98784	4.10534	3.89915	4.01192	3.78297	3.98105	4.13571	3.96057	5.12111	5.05095	4.88294	4.76611	4.57645	4.63845	4.74034	4.63044	4.77131	5.0239	4.88219	5.06531	4.80215	5.0219	4.84287	4.7243	4.81196	4.97275	4.93034	5.04144	4.87286	4.83837	4.80903	4.56414	4.6205	4.68813	4.53125	4.68981	4.63421	4.71042
Indole-3-carboxylic acid_neg	5.26663	5.34526	5.23061	5.24572	5.28534	5.27449	5.29108	5.23868	5.28917	5.37213	5.23142	5.30026	5.31182	5.22665	5.33551	5.28151	5.15593	5.30838	5.3492	5.72621	5.71357	5.77374	5.7148	5.65244	5.73013	5.65799	5.70933	5.61444	5.79333	5.94662	5.70302	5.85063	5.66419	5.72268	5.70238	5.89003	5.76152	5.70925	5.78477	5.78541	5.73235	5.72025	5.7909	5.67008	5.6689	5.7761	5.61717	5.70477	5.73486
Fumaric + maleic acid_neg	5.06666	5.43425	4.77232	4.97796	4.89544	4.78582	4.66018	4.91013	5.05793	4.47447	4.67476	4.6792	4.92993	4.96929	4.68623	5.61615	4.78534	4.71647	4.90836	5.91154	5.96268	5.89575	5.89738	5.84477	5.87355	5.84551	5.83676	5.79993	5.89943	6.10267	5.82048	6.0556	5.85548	5.88012	5.85422	6.06962	5.9506	5.88982	5.91139	5.92052	5.92259	5.9421	5.97561	5.83577	5.87558	5.92858	5.76465	5.8729	5.77756
L-Tyrosine	6.7641	6.74286	6.82	6.76527	6.883	6.87116	6.63673	6.83091	6.80115	6.55558	6.72956	6.81734	6.88816	6.88323	6.65015	6.65064	6.80613	6.71106	6.85493	7.15853	7.26325	7.36054	7.25893	7.13515	7.10612	7.0625	7.22196	7.07499	7.26181	7.28125	7.46791	7.23218	7.50391	7.16256	7.25667	7.27348	7.25785	7.18945	7.25136	7.19549	7.15735	7.26931	7.17416	7.09648	7.17632	6.98575	7.01654	7.21595	7.21805
putrescine	5.19176	5.19243	4.90235	4.98547	5.19143	4.96664	4.6816	5.0898	5.19483	4.85682	5.0255	5.01038	4.99796	5.15882	4.78666	5.09384	5.09904	5.04095	5.00706	5.48923	5.3563	5.46842	5.39645	5.2731	5.30227	5.33105	5.21674	5.38726	5.47763	5.51476	5.51058	5.5462	5.47323	5.47189	5.44403	5.51166	5.42991	5.57439	5.66355	5.49712	5.35167	5.39767	5.28146	5.33395	5.29175	5.39521	5.33125	5.35187	5.27353
Aminoadipic acid	5.0636	5.19973	4.99524	4.99162	5.09775	5.1555	5.0509	5.00035	5.0506	5.13935	5.0979	5.14125	5.08238	5.05452	5.08289	5.08823	4.99698	5.10341	5.13819	5.27687	5.36632	5.31959	5.27764	5.29036	5.27376	5.29321	5.33267	5.22905	5.32304	5.55727	5.24371	5.50149	5.26129	5.33305	5.28739	5.43766	5.3615	5.30677	5.40567	5.32666	5.27073	5.35877	5.41461	5.21769	5.25073	5.36045	5.21504	5.3396	5.31997
p-coumaric acid	6.75277	6.69498	6.76723	6.7166	6.81613	6.80395	6.60982	6.83165	6.77847	6.47455	6.67043	6.7701	6.86647	6.83081	6.62185	6.615	6.73686	6.65493	6.81372	7.10837	7.2097	7.28849	7.1768	6.99163	7.02703	7.00393	7.15202	6.93173	7.19123	7.21859	7.39511	7.16603	7.43112	7.09624	7.19931	7.20643	7.15878	7.11192	7.16496	7.08164	7.15253	7.17941	7.05796	7.02386	7.06819	6.87613	6.90683	7.12621	7.12797
adenine	6.39683	6.34436	6.44145	6.37551	6.47169	6.47614	6.21351	6.44545	6.42472	6.16855	6.33596	6.4513	6.51988	6.50653	6.23689	6.26526	6.40181	6.33764	6.47321	6.70182	6.77526	6.87259	6.76835	6.60219	6.6217	6.60313	6.72731	6.60092	6.77373	6.78486	6.95561	6.73163	7.00887	6.6663	6.77557	6.77337	6.76191	6.70547	6.76369	6.70783	6.72011	6.77818	6.63623	6.62734	6.67541	6.47427	6.52603	6.70078	6.70547
Alpha-ketoisovaleric acid_neg	5.07165	5.51609	4.77818	4.96768	4.87662	4.81305	4.69845	4.93485	5.07293	4.57057	4.77049	4.75638	4.98026	5.12988	4.80934	5.75246	4.83007	4.59045	4.99883	5.82729	5.8988	5.91534	5.83874	5.77543	5.85298	5.79269	5.75436	5.76213	5.86757	6.05291	5.77743	5.97774	5.81297	5.81251	5.82706	6.08366	5.88367	5.7753	5.92746	5.92011	5.84865	5.86542	5.96283	5.84518	5.84416	5.8802	5.68477	5.87547	5.7161
Methylcysteine	6.75958	6.74325	6.85249	6.76785	6.87219	6.86574	6.64896	6.87941	6.81139	6.54532	6.74037	6.81992	6.92116	6.88911	6.63443	6.64813	6.84206	6.73617	6.85466	7.09633	7.19539	7.27259	7.1825	7.00921	7.02895	6.99968	7.14556	6.99877	7.18353	7.21377	7.38612	7.15944	7.42388	7.08745	7.19684	7.19801	7.16121	7.11983	7.17544	7.11465	7.13191	7.19576	7.0705	7.02516	7.08768	6.87589	6.91828	7.11314	7.09958
3-hydroxybutyric acid_neg	4.93585	4.6672	4.47315	5.4733	4.79013	3.87134	4.12249	4.00863	4.83676	4.47759	4.60612	3.86196	3.65566	4.80372	4.95762	5.08931	3.49578	4.36273	4.45342	6.21388	6.23825	5.77257	5.60984	6.1221	5.56059	5.86917	5.49149	5.66457	6.02497	5.38574	5.50184	5.85293	5.13594	6.05549	6.00986	6.5596	6.11228	6.35184	6.17895	5.51391	5.42673	5.24748	6.06065	5.52795	5.55645	5.49688	5.33586	5.80671	5.66215
2-Oxo-3-methyl-butyrate	5.92154	5.85425	5.80154	5.78088	5.7152	5.88099	5.78124	5.86527	5.66266	5.92404	5.74746	5.85071	5.6729	5.7249	5.62995	5.839	5.88201	5.90969	5.69985	6.0692	6.14943	6.18579	6.06688	6.0675	6.07796	6.13403	6.00593	5.92465	6.11118	6.11449	6.07174	6.16759	6.14281	6.17683	6.2293	6.20384	6.11052	6.26068	6.31023	6.29703	6.11803	6.09632	6.01996	6.07473	6.02852	6.09138	6.04728	6.04629	5.89714
Asymm + symm dimethylarginine	6.05609	5.89876	5.97623	6.22965	5.87649	6.21479	5.69555	5.96198	5.95122	5.8877	5.73165	5.89008	5.94186	6.27882	5.92707	5.87535	5.99197	5.75151	5.95444	6.62913	6.5241	6.12627	6.41349	6.30239	6.37293	6.25433	6.20055	6.19745	6.2884	6.35855	6.31677	6.43848	6.3496	6.47151	6.40719	6.35962	6.30086	6.36487	6.27672	6.07107	6.15584	6.01277	6.11268	6.12162	6.10641	6.21319	6.08774	6.28928	6.2527
L-Leucine + L-isoleucine	8.33554	8.37196	8.47536	8.24089	8.444	8.36719	8.24942	8.41968	8.31611	8.25081	8.39015	8.45053	8.29863	8.29789	8.3541	8.27193	8.3943	8.20169	8.36293	8.60916	8.73495	8.63065	8.5776	8.5872	8.447	8.46106	8.52754	8.50147	8.69065	8.60901	8.65165	8.74273	8.72732	8.62868	8.60233	8.80561	8.67406	8.68108	8.71285	8.58726	8.55557	8.66033	8.50745	8.43401	8.53495	8.45667	8.41279	8.63735	8.40967
uridine_neg	4.59429	4.71563	4.64542	4.67489	4.63515	4.86062	4.6965	4.70344	4.52079	4.58528	4.68532	4.47996	4.71779	4.79265	4.66531	4.44045	4.74935	4.53949	4.66284	5.06576	4.87912	4.73723	5.09738	4.90168	4.94521	4.95397	5.0469	4.87172	5.17695	4.96929	5.06439	5.06241	4.99913	5.00146	4.89339	5.15977	4.95864	4.79619	5.06865	5.00541	5.0175	4.95205	5.20728	4.71916	4.73845	4.83706	4.80766	5.03643	4.97916
2-hydroxybutanoic acid_neg	4.90509	4.8904	4.30121	4.90035	4.64197	4.5159	4.49035	4.37592	4.66983	4.29128	4.45017	4.57971	4.52502	4.72893	4.61507	4.73366	4.01207	4.40212	4.52226	5.23032	5.08628	5.2224	4.78288	5.00222	4.78116	4.94358	4.86727	4.62601	5.20657	4.81084	5.09666	5.17317	5.07585	5.00224	4.9568	5.41686	5.16623	5.11842	5.23776	4.75282	4.96565	5.21821	5.09833	4.8217	4.75706	4.87867	4.79369	4.93857	4.89381
asparagine	5.22071	5.09876	5.5039	5.20457	5.46301	5.34643	5.30918	5.51832	5.31935	5.35543	5.29277	5.57979	5.35401	5.44206	5.45111	4.95977	5.62719	5.04849	5.38	6.05364	6.16667	5.75412	5.58597	6.19676	6.18852	5.34069	6.33075	6.39726	5.41253	6.14125	6.19348	6.13067	6.11849	5.72588	6.08801	6.21865	6.10293	6.56468	6.32828	5.5177	5.40784	5.66615	5.55858	6.20194	6.12235	5.9009	5.75602	5.58246	6.16124
Glyceric acid_neg	3.84583	4.10359	4.18005	4.03337	4.27441	4.25345	4.1637	4.05222	4.40384	4.29619	4.37955	4.28101	4.12717	4.03049	4.21787	4.08267	4.09867	3.93759	4.32657	4.39251	4.25411	4.72711	4.48678	4.11128	4.54697	4.27564	4.4811	4.34916	4.5517	4.61216	4.72609	4.43064	4.2822	4.30448	4.58902	4.3455	4.57716	4.33663	4.75692	4.57482	4.40242	4.50007	4.75762	4.44937	3.9911	4.34349	4.46693	4.42551	4.31571
dUMP_neg	4.34353	4.48786	4.59974	4.14083	4.47088	4.49974	4.68696	4.57414	4.43372	4.57509	4.59455	4.17641	4.69001	4.36061	4.74998	4.56878	4.26196	4.68763	4.51412	5.15725	4.67753	4.55868	4.73716	4.83315	4.77422	4.75398	4.83062	4.98237	4.88412	4.90026	4.90976	4.75295	4.54427	4.70013	4.8408	4.75425	5.06149	4.78036	4.69367	4.88227	4.72611	4.76953	4.71839	4.98662	4.70763	4.68532	4.62467	4.97712	4.9168
ornithine	4.89462	4.99037	5.24623	5.00521	5.18739	5.06407	5.44747	5.15441	5.12191	5.59421	5.32455	5.20487	4.99641	5.17328	5.4064	5.19077	5.15975	4.94323	5.31812	6.61032	6.70003	5.31573	5.38167	5.29747	6.46953	5.29628	6.58513	6.13272	5.21273	5.27856	5.33162	5.43956	5.44865	5.31831	5.24518	6.57133	5.269	6.80986	5.38695	5.2488	5.25294	5.42979	5.25026	5.01592	5.20665	5.18157	5.09569	5.32332	6.62203
7-methylguanosine	5.59844	5.67103	5.59522	5.77948	5.32986	5.86647	5.52237	5.36706	5.55091	5.35049	5.58055	5.27745	5.49345	5.72927	5.57993	5.76799	5.3641	5.30629	5.57421	5.77509	5.88602	5.90052	5.75836	5.72699	5.69526	5.59248	5.80093	5.75777	5.81997	5.93607	5.87528	5.94253	5.83022	5.52543	6.03388	5.84165	5.87761	5.78224	5.73485	5.57188	5.70919	5.68849	5.50702	5.6327	5.6488	5.48217	5.5392	5.60698	5.9867
Uric acid_neg	7.44213	7.44577	7.37929	7.53254	7.45668	7.60064	7.16723	7.52853	6.46045	4.43958	7.47742	6.97131	7.40945	7.74721	6.7737	6.77159	7.60375	7.41048	7.58668	7.75099	7.46723	7.90799	7.63183	7.55768	7.33845	7.63511	7.52926	7.6009	7.74101	7.63995	7.66135	7.75662	7.55587	7.66231	7.51545	7.65923	7.64283	7.54357	7.67627	7.77486	7.73815	7.83288	7.44497	7.43945	7.56809	7.57135	7.39239	7.62543	7.80547
Indoleacrylic acid_neg	5.17164	5.14268	5.13594	6.88079	5.02684	5.21429	4.1228	4.79433	4.66981	4.79602	4.94281	4.81601	5.12618	5.04553	5.09352	3.87875	5.01328	5.64758	5.14883	5.65932	5.87606	5.54646	5.41221	5.08553	5.03157	5.14107	4.9973	5.24887	5.53172	5.41449	5.61137	5.23677	5.53789	5.29706	5.34854	5.42628	5.37485	5.40664	5.56232	5.49233	5.42395	5.39491	5.1636	5.14436	5.28211	5.10519	4.98106	5.28164	5.2669
L-Methionine	6.5957	6.16003	6.26946	6.42555	6.5411	6.74664	6.37974	6.39694	6.34227	6.09699	6.2398	6.41753	6.55518	6.59987	6.49986	6.40486	6.63334	6.18723	6.49952	6.40332	6.40089	6.99612	6.76487	6.6768	6.43905	6.63361	6.33856	6.58317	6.80183	6.81419	6.98649	6.73698	7.00633	6.72075	6.82814	6.50938	6.80499	6.30156	6.83066	6.70835	6.50923	6.61163	6.67348	6.68449	6.86084	6.7097	6.53674	6.83775	6.26431
Citraconic acid_neg	5.43221	5.51022	5.58778	5.32432	5.59983	5.51743	5.41396	5.40208	5.49003	5.54969	5.31082	5.4662	5.61493	5.4224	5.45021	5.35834	5.3803	5.47589	5.18294	5.79226	5.65139	5.51658	5.59215	5.28501	5.37397	5.44199	5.57113	5.54076	5.54181	5.62327	5.61852	5.66573	5.66283	5.54063	5.6541	5.57068	5.46925	5.68299	5.62519	5.50382	5.48958	5.52277	5.49006	5.32063	5.38668	5.41498	5.48509	5.48262	5.60297
trimethylamine oxide	5.38068	5.50169	6.05441	5.58239	6.13375	6.38522	5.41142	6.25168	5.61258	5.39943	6.12485	5.04913	4.97617	6.2714	5.46811	5.51147	6.54	5.14722	5.90622	5.82024	4.96736	6.28953	6.10284	5.69206	6.29826	5.92228	5.52077	5.8858	5.84723	5.61819	5.81404	6.31535	5.74738	5.9299	6.11388	5.30084	5.59599	5.54211	5.5554	6.04714	6.29396	6.15561	5.95746	5.68124	5.44154	5.89957	5.9984	5.68928	5.94543
N-Acetyl-L-alanine_neg	4.94932	5.05959	4.75438	4.97226	4.72716	5.12034	4.67136	4.72107	4.71305	4.43903	4.77334	4.58184	4.78047	5.13093	4.70854	4.70199	4.73761	4.58258	4.81202	4.96056	4.85211	5.06199	4.88795	4.84845	4.74717	4.96839	4.73122	4.71667	4.92088	4.88078	4.73683	5.03645	4.97019	4.88704	4.90552	4.95574	4.83333	4.83602	4.79553	4.86032	4.88242	5.06771	4.81176	4.77275	4.7209	4.74255	4.69027	4.73091	4.94842
Allantoic acid_neg	4.53176	4.80075	4.75205	4.7819	4.89366	4.8583	4.65328	4.73468	4.80771	4.85467	4.90355	4.56595	4.66224	4.59149	4.6277	4.86613	4.69249	4.54375	4.84553	4.78525	4.77646	4.82605	5.08025	4.94905	4.90319	4.95711	4.70814	4.85218	4.98678	5.02962	4.82132	5.04543	4.92228	4.93044	4.93416	4.96098	4.5625	4.86579	4.93216	4.79918	4.86804	4.89503	4.98615	4.71971	4.78119	4.79448	4.83688	4.75393	4.76772
pantothenic acid	5.03821	5.27205	5.07672	5.07204	4.90467	5.33087	4.93859	5.10072	5.04909	4.62484	5.12985	5.02469	5.08001	5.19744	5.06251	5.16463	4.78627	4.92346	5.04525	5.19897	5.21255	5.38387	5.00915	4.81486	5.07547	5.09595	5.38841	5.13649	5.2145	5.56766	5.41391	5.41452	5.18573	5.23283	5.39099	5.22642	5.39523	5.29429	5.25329	5.0276	5.36819	5.22163	5.00642	5.01357	4.94584	5.07799	5.18669	4.71616	5.23371
Tetradecanedioic acid_neg	5.99373	5.96637	6.10009	5.90932	6.06526	6.32273	6.08486	6.28459	5.98912	5.99602	5.94017	6.08565	5.72972	5.83482	5.99278	5.857	6.15743	6.05604	6.00066	6.3812	6.11255	6.30085	6.15876	6.24072	6.00296	6.3064	6.2225	6.02602	6.42223	6.32139	6.25338	6.18805	6.25542	5.965	6.24927	6.25019	6.333	6.17587	6.55727	5.90407	6.28818	6.01776	6.52839	5.96908	5.87778	6.00538	6.21152	6.06776	5.89117
Phenyllactic acid (2)_neg	5.15654	5.06053	4.91851	5.10142	4.56178	4.96683	4.6627	4.59333	5.01027	4.55143	4.88672	4.74603	4.88943	4.84833	5.02226	5.42323	4.87924	4.62835	4.88608	5.73145	5.63597	4.87847	5.65708	5.99938	4.65352	5.88292	6.00281	5.75148	5.85813	4.78551	4.83878	6.03752	5.80442	6.14053	4.88462	4.74502	4.95485	5.58737	6.26527	5.80756	4.76015	5.96198	5.61292	4.67302	5.5082	5.46497	6.00554	5.48152	5.10078
L-Glutamine (?)	5.56019	5.45841	5.04068	5.49587	5.7877	5.73453	5.63399	4.86393	5.52315	5.64176	5.66966	5.42413	5.73833	5.66006	5.3061	5.48728	5.72465	5.41844	5.67474	6.12926	6.15834	5.62459	5.54752	5.58121	5.53849	5.57865	5.62732	5.64702	5.65953	5.65737	5.7372	5.70073	5.35391	5.63066	5.67581	5.75986	5.51151	5.73183	5.67526	5.58116	5.48269	5.38256	5.61079	5.47334	5.54878	5.59515	5.56412	5.79149	5.5499
hippuric acid_neg	5.48457	5.83713	6.46017	5.81059	5.58609	6.16792	6.18516	6.27994	6.56402	5.45721	5.97145	5.80342	4.12369	5.81075	5.18397	5.18897	6.12247	6.05493	6.64181	6.60808	6.29583	6.06862	6.58292	5.84847	5.92634	6.04216	6.03835	5.93766	5.51115	6.46367	6.15411	6.15211	5.84603	5.61325	6.29812	5.48395	5.6956	6.51553	5.88621	6.3862	6.40572	6.13546	5.93638	5.67507	5.77718	5.49897	6.07122	5.81628	5.48341
hippuric acid	6.06003	6.35092	6.94194	6.34425	6.12788	6.3913	6.74677	6.81224	7.10304	6.03434	6.57778	6.3395	5.21326	6.3307	5.75617	5.8066	6.63777	6.59844	7.184	6.88476	6.62137	6.6565	7.13874	6.38533	6.53266	6.70691	6.63038	6.6176	5.99718	6.97588	6.68428	6.68307	6.42137	6.14574	6.79928	6.06724	6.2882	7.12674	6.42782	6.8454	6.91728	6.65062	6.53336	6.35402	6.38878	6.02615	6.71555	6.26947	5.86685
gluconic acid_neg	5.32913	6.16353	5.49184	5.35283	5.24032	5.32571	5.49217	5.25317	5.39867	5.30113	5.64066	5.3709	5.38908	5.54113	5.24114	5.49065	5.16853	5.18323	5.5322	5.64152	5.51502	5.87464	5.54239	5.371	5.66851	5.5223	5.22942	5.24877	5.45027	5.53089	5.14341	5.66867	5.62688	5.50808	5.40017	5.5068	5.19614	5.47306	5.53815	5.4153	5.59618	5.76688	5.38847	5.37987	5.13746	5.37843	5.33143	5.20216	5.37897
Pantothenic acid_neg	4.96693	5.313	5.04977	4.99571	4.94909	5.31648	4.92848	5.05793	5.10106	4.58064	5.05821	5.00019	5.07097	5.20118	5.10425	5.04443	4.78081	5.00268	5.08562	5.12535	5.15911	5.29073	5.02812	4.95888	5.04624	5.11925	5.26574	5.24993	5.14533	5.30958	5.12679	5.26397	5.02305	5.19204	5.29005	5.09618	5.15543	5.10246	5.41517	5.02008	5.3663	5.24952	5.00384	4.99023	4.93807	5.10705	5.08892	4.83808	5.31194
carnitine	7.77605	7.89635	7.74301	7.84418	7.65842	7.91901	7.60918	7.81784	7.54792	7.75396	7.73378	7.75059	7.88427	8.03518	7.56679	7.80936	7.72946	7.4411	7.68183	7.99755	7.86816	8.11337	7.8004	7.69474	7.83853	7.74808	7.7365	7.83618	7.74165	7.91418	7.7845	7.83931	7.841	7.82197	7.83442	7.78482	7.80999	7.88003	7.83727	7.59815	7.76864	7.86309	7.62959	7.73939	7.73032	7.72434	7.71545	7.77776	7.71882
Ureidosuccinic acid_neg	4.72798	4.79238	4.85444	4.85675	4.9179	4.90953	4.72143	4.73869	4.82969	4.87363	4.99933	4.64069	4.69943	4.73196	4.59615	4.91791	4.80788	4.46032	4.9005	4.72766	4.71818	4.83482	5.0234	4.89978	4.92546	4.9875	4.66548	4.84437	4.9808	5.05881	4.79728	5.0456	4.88107	4.8918	4.87598	5.01884	4.59616	4.78813	4.96614	4.76834	4.94002	4.89928	4.97454	4.71501	4.76135	4.833	4.83563	4.84899	4.77358
citrulline	6.0012	5.79485	6.51307	5.92695	6.53544	6.31874	5.87234	6.34101	6.33797	6.4169	6.32908	6.04435	6.24571	5.86579	6.08921	6.16515	6.44759	6.23554	6.29646	6.24559	6.23424	6.08927	6.33081	6.22188	6.26661	6.19895	5.99211	6.09079	6.26277	6.33251	6.18372	6.39557	6.29587	6.19341	6.20846	6.30748	5.97548	6.27373	6.2778	6.05312	6.28673	6.23223	6.26492	6.07012	6.02092	6.06582	6.07681	6.15976	6.03301
glucose_neg	4.92618	5.26093	4.99901	4.94282	4.72347	4.88406	4.82573	4.74701	4.74352	5.01367	4.86934	5.06795	4.80449	4.93751	4.95403	4.76172	4.6538	4.8732	4.82045	4.88558	4.99283	5.03125	4.89959	4.79234	4.91439	5.00193	4.84153	4.82354	4.86463	4.95081	4.9636	5.09034	5.10887	4.85649	4.9162	5.02869	4.88765	5.06424	4.96042	4.87924	4.82605	5.07858	4.79552	4.86067	4.86716	4.85828	4.8712	4.70395	4.86608
L-Tryptophan	7.57455	7.56779	7.7229	7.43307	7.80747	7.8564	7.50082	7.81192	7.6393	7.15431	7.57376	7.76375	7.78449	7.42209	7.46724	7.45774	7.86001	7.51317	7.76803	7.85815	8.24152	7.80425	7.68883	7.52482	7.50859	7.42922	7.47064	7.37516	7.82703	7.75851	7.97037	7.57494	7.81833	7.63637	7.57025	7.63326	7.69574	7.59542	7.75443	7.68268	7.70246	7.64912	7.54775	7.51514	7.63362	7.46035	7.43205	7.49894	7.5168
Acetylcarnitine	7.67388	8.19134	7.81723	8.16345	7.89722	7.62454	7.23221	7.69168	7.72044	7.58143	7.3785	7.48105	7.44123	7.81528	7.20969	8.00083	7.7768	7.27788	7.72421	8.08108	7.84706	8.11427	7.6257	7.7405	7.61975	7.77921	7.66981	7.60893	7.85993	7.94013	7.61336	7.94605	7.76771	7.80525	7.86608	7.89835	7.82827	7.80585	7.80965	7.6498	7.65171	7.88522	7.68875	7.59689	7.58454	7.52721	7.56299	7.61708	7.58994
Alpha-N-Phenylacetyl-L-glutamine	5.64788	6.36631	5.65603	6.14481	5.46863	6.26072	6.05049	5.59416	5.87196	5.50996	6.0817	5.4327	5.51395	6.32942	5.49217	5.68974	5.09231	5.78766	6.05564	5.35021	5.616	5.70798	5.77926	5.95708	5.25823	5.70917	5.51853	5.76765	5.71596	5.74082	5.75206	6.23114	5.53217	5.76154	5.85603	5.67352	5.60306	5.22837	5.93447	5.55279	5.77878	5.99384	5.79083	5.41625	5.59323	5.44425	5.52862	5.72237	4.95209
L-Histidine	6.81909	6.88455	7.16855	6.83718	7.01193	6.76719	7.16193	6.99498	6.88629	6.89462	7.00073	7.13807	6.76504	6.81752	6.95434	6.67418	7.11261	6.66629	7.0395	8.41963	9.14619	7.00818	6.8914	6.76696	6.7943	6.63904	6.75615	6.79471	6.83566	6.90306	6.91162	6.83701	6.88891	6.89913	6.86952	6.90327	6.8422	6.90007	6.88264	6.92584	6.88901	6.83756	6.89229	6.74459	6.70516	6.8066	6.67584	6.91099	6.69346
d-glucose_neg	5.31586	5.70955	5.36616	5.37613	5.20496	5.27864	5.24039	5.20866	5.22559	5.38414	5.3037	5.53262	5.21027	5.31217	5.398	5.15686	5.11094	5.26383	5.26871	5.28123	5.36728	5.33699	5.25609	5.17409	5.19596	5.31585	5.21332	5.25282	5.27711	5.3265	5.37696	5.44353	5.56798	5.26556	5.2724	5.42502	5.2156	5.4864	5.3125	5.1701	5.13825	5.3425	5.17732	5.25947	5.2722	5.30072	5.23051	5.16592	5.1474
Hydroxyisocaproic acid_neg	5.42114	5.38936	5.16929	5.5898	5.3035	5.30729	5.33041	5.15109	5.32738	5.21416	5.30149	5.1501	5.47603	5.3455	5.48166	5.30828	5.25211	5.19873	5.29756	5.22568	5.27781	5.48557	5.45495	5.40897	5.33647	5.09234	5.15885	5.11938	5.49312	5.28375	5.42938	5.52982	5.49603	5.30076	5.23495	5.54984	5.48577	5.45383	5.4853	5.30704	5.24551	5.51699	5.3806	5.0985	5.28385	5.24982	5.13436	5.38089	5.46931
Quinolinic acid	4.85141	4.89257	4.87161	4.72655	4.90216	4.91028	4.97552	5.01295	4.75615	4.88115	4.78799	4.88636	4.95562	4.80631	4.93567	4.99705	4.77206	5.06515	4.78268	5.00234	4.9138	4.81165	4.98535	5.34455	4.46335	5.47707	5.24242	4.92432	5.23969	3.91775	4.40817	5.43257	5.0571	5.42079	3.74373	4.17639	4.4415	4.94404	5.56918	5.36735	3.86494	5.20104	4.8262	4.42162	5.25048	4.763	5.31452	4.91597	4.16358
Kynurenine (1)_neg	4.82368	5.03318	4.91086	4.68368	4.59956	4.92316	4.27627	4.58517	4.82009	4.66516	4.80144	4.70467	4.88935	5.04754	5.07148	4.66751	4.70128	4.70191	4.64391	4.73235	4.63642	4.73425	4.85884	4.90824	4.57021	4.62496	4.82697	4.66668	4.63116	4.82706	4.81888	4.71409	4.89737	4.71758	4.69917	4.6394	4.62086	4.69154	4.75889	4.9199	4.89112	4.68872	4.53377	4.62485	4.58274	4.53301	4.52742	4.52614	5.12871
Pyridoxamine	7.52254	7.39794	7.40637	7.59831	7.51281	7.71405	7.06377	7.62109	6.49562	4.38489	7.49257	6.93922	7.43527	7.87711	6.751	6.71273	7.67362	7.47656	7.61146	7.57702	7.31675	7.65256	7.37465	7.08645	6.96968	7.49249	7.34188	7.38586	7.49033	7.38841	7.39924	7.49709	7.35114	7.51868	7.25699	7.44858	7.31842	7.22344	7.39405	7.58464	7.55983	7.56332	7.20901	7.17107	7.04904	7.23145	7.18499	7.45027	7.55351
Melatonin	5.29111	5.95267	5.34566	5.4862	5.37835	5.55373	5.1118	5.54576	5.06759	5.10433	5.70244	5.19454	5.53715	5.74252	5.13157	5.56163	5.4877	5.038	5.43707	5.18392	6.03612	5.91296	5.04676	5.32263	4.94705	5.2147	5.15623	5.04624	5.21444	5.5315	5.25263	5.41406	5.0632	5.22031	5.34264	5.18256	5.14684	4.93491	5.32494	5.26392	5.39285	5.69398	5.07252	5.20533	5.12306	5.05113	5.11018	5.0035	5.0814
Cystine (1)	5.34025	4.59995	5.23813	5.41479	5.42957	5.12927	5.21953	5.35537	5.13893	5.10416	5.30321	5.16509	5.32304	5.25405	5.17723	4.6813	5.2419	5.25775	5.43742	5.26004	4.99192	5.35176	5.32426	5.16316	5.1947	5.14973	4.93239	5.01114	5.15013	5.23713	5.20059	5.2341	5.29189	5.15801	5.21903	5.40553	5.00453	5.38039	5.081	5.18564	5.28542	5.34484	5.17997	5.04107	5.17265	5.04818	4.77228	5.07538	4.5587
Homogentisic acid_neg	6.4864	6.44299	6.3975	6.55363	6.51385	6.59757	6.11071	6.57733	5.49883	6.44567	6.55703	6.03829	6.42364	6.79348	5.79338	5.83239	6.62201	6.43226	6.59614	6.38182	6.20841	6.60615	6.43709	6.40803	6.17783	6.46441	6.3437	6.45326	6.36337	6.27553	6.29837	6.38261	6.21303	6.33426	6.18129	6.37323	6.28828	6.19393	6.43787	6.51107	6.53602	6.64584	6.25896	6.28036	6.39365	6.43138	6.29334	6.49406	6.70964
acetyl-CoA (2)	4.52104	4.48778	4.93412	4.40754	4.52113	4.30797	4.26348	4.60419	4.48178	4.59974	4.40244	4.61324	4.44709	4.24929	4.36289	4.54806	4.63813	4.54072	4.2661	4.95117	4.44243	4.41826	4.27753	4.24001	4.1798	4.37051	4.15358	4.04816	4.71327	4.5518	4.55853	4.54803	4.41542	4.4244	4.39878	4.31839	4.42844	4.41323	4.50532	4.27163	4.51956	4.29879	4.36872	4.24913	4.34048	4.45867	4.0658	4.06104	4.31261
caffeine	6.46465	6.96591	6.76253	5.61963	7.4616	6.19714	7.54238	6.47221	7.64789	6.03269	6.30614	6.55189	6.5847	6.32778	7.7915	7.08876	5.56208	7.08662	7.50783	6.04586	5.66779	6.30075	6.95569	6.22932	5.44716	5.89751	6.07128	6.23171	6.4931	6.72397	7.08486	6.56444	7.43907	6.44825	6.43132	6.24139	6.52654	6.07181	5.20289	7.27666	6.49552	7.25938	5.05999	6.34805	5.92773	6.45876	5.67981	6.99252	7.39372
L-Kynurenine (2)	6.21337	6.34631	6.2677	6.11155	5.90995	6.25356	5.85795	6.02246	6.19206	5.95749	6.10031	6.12346	6.19831	6.4045	6.40747	6.18107	6.09724	6.04752	6.10494	6.0578	5.93525	6.06012	6.16618	6.18263	5.92325	5.96387	5.98395	5.90463	6.05586	6.23064	6.18074	6.09746	6.27583	6.20046	6.07376	5.96614	5.99315	5.92032	6.07911	6.14342	6.16362	6.11002	5.87004	5.97555	5.95576	5.89722	5.86149	5.77609	6.31617
xanthine	7.37258	7.04253	7.0463	6.92046	6.89948	7.32591	6.57293	7.36528	6.87842	6.67395	8.1397	7.17872	6.45317	7.61455	7.00828	6.98741	6.81761	6.5559	6.93099	6.85152	6.74586	7.60169	6.64952	6.94133	6.58429	8.02628	7.01859	6.61055	7.04478	6.85654	6.73537	6.87856	6.77853	6.88848	6.82735	6.98991	6.84322	6.73166	6.99915	6.88367	7.08478	7.24326	6.74463	6.60416	6.63407	6.57391	6.72643	6.63436	7.11638
Pyroglutamic acid_neg	4.18402	4.31767	4.10104	4.27596	4.42792	4.36355	4.45209	3.89896	4.15414	4.2833	4.41338	4.45196	4.25638	4.23788	4.28575	4.39011	4.26439	4.13226	4.55655	4.3258	4.47836	4.38348	4.23441	3.95208	4.1567	4.21912	3.74652	3.84425	4.17831	4.01527	4.00333	4.05254	4.06548	4.23105	3.99991	4.24058	3.95524	4.1824	4.16559	4.19369	4.31217	3.81101	4.25089	4.14385	4.11628	4.21125	3.82784	3.94574	3.73125
cytidine	4.316	4.90763	4.25955	4.44657	4.09646	4.32598	3.95332	3.90643	4.37979	3.91749	4.37653	4.25489	4.4207	4.58539	4.45616	4.28683	3.87578	4.26785	4.22522	4.35758	4.04233	4.38708	4.18182	3.94821	4.07068	4.1653	3.87167	4.28129	4.09734	4.30924	3.94554	4.22392	4.23987	4.16981	4.03812	3.9597	3.85805	3.87479	4.14616	4.02184	4.2058	4.08146	3.85397	3.95185	4.03744	3.9528	3.99683	4.13665	4.36973
2-Aminooctanoic acid (1)	5.79399	6.56952	6.42349	6.32509	6.48128	6.62422	6.19896	6.30807	6.29972	6.09474	6.2133	6.63462	6.30076	6.40924	5.63261	6.06326	6.31969	6.21619	6.36448	6.06801	5.57215	6.02652	5.98712	6.21042	6.14239	5.89476	6.07792	6.28749	6.0524	6.39812	6.12575	6.29529	6.22504	5.83454	6.29279	6.10615	6.26235	6.2803	6.28194	5.99548	6.20037	6.01793	5.83326	6.27752	6.24302	6.22893	5.89684	5.8762	6.05531
L-Valine	6.41368	6.43952	6.4886	6.30744	6.45025	6.33711	6.43073	6.46248	6.39871	6.43489	6.49768	6.5023	6.42395	6.30832	6.46802	6.41506	6.45752	6.32653	6.458	6.20242	6.16166	6.42374	6.35178	6.46112	6.07718	6.23903	6.15207	6.20586	6.40754	6.38268	6.45302	6.50097	6.5199	6.27821	6.43037	6.41474	6.417	6.14763	6.53256	6.33007	6.32294	6.48095	6.2863	6.32065	6.35261	6.31857	6.21646	6.42025	5.69103
serotonin	4.85273	4.6846	5.13978	4.68994	5.12615	5.06481	4.83455	5.2104	4.97635	4.94462	5.00294	4.98739	4.99802	4.97597	4.88676	4.6396	5.19001	4.81381	4.91559	4.91368	4.80004	4.7769	4.96676	4.90261	4.84633	4.85948	4.64883	4.76156	4.76774	4.93639	4.75727	4.92933	4.89684	4.84583	4.83432	4.85197	4.58822	4.93836	4.92159	4.70472	4.85399	4.89917	4.86354	4.61702	4.69253	4.80069	4.72449	4.70569	4.73362
Guanidinoacetic acid	5.8147	5.36832	5.31406	5.72644	5.76203	5.31018	4.97452	5.21132	5.37936	5.25547	5.49765	5.07071	5.46205	5.79637	5.85134	5.80941	5.35807	5.27017	5.06789	5.43517	4.96725	5.42849	5.31562	5.78945	4.44136	5.44321	4.48834	4.53009	5.54824	4.97833	4.77582	5.51649	4.78606	5.59481	5.35084	5.15992	5.21671	4.84713	5.289	5.20104	5.29968	5.11715	5.57202	4.84515	5.01919	5.32799	5.22506	5.21264	4.68162
Lipoamide	7.26927	7.27061	7.44326	7.15238	7.4913	7.56441	7.24645	7.51966	7.33061	6.88596	7.30125	7.4831	7.53483	7.15762	7.1709	7.15092	7.56612	7.24297	7.45134	7.48036	7.76696	7.38277	7.24804	7.02467	7.01973	7.01422	7.0048	6.86576	7.42531	7.32306	7.55377	7.13865	7.39668	7.16423	7.15839	7.18411	7.20894	7.14305	7.32645	7.2564	7.2387	7.204	7.13078	7.03664	7.17188	6.99663	6.90471	7.05956	7.04249
Methylmalonic acid_neg	4.57246	4.8324	5.01175	4.69161	4.68244	4.90008	4.59725	5.02985	4.8983	4.83567	4.56104	4.81051	4.65239	4.79579	4.77739	4.57186	4.78567	4.71348	4.73855	5.78765	5.03038	4.67535	4.69256	4.31274	4.40697	4.51574	4.79008	4.41254	4.73449	4.53639	4.5574	4.76289	4.8109	4.46598	4.60635	4.59911	4.56323	4.40258	4.58921	4.78216	4.63625	4.70866	4.7232	4.57947	4.47928	4.4764	4.41441	4.59597	5.21732
Pyroglutamic acid	5.1586	5.19666	4.87438	4.48654	4.63225	5.27493	4.97564	4.73818	4.50304	4.71074	5.20547	4.69226	4.88204	5.60382	5.20955	5.48812	5.26999	4.66019	5.03974	5.03617	5.08362	5.06761	4.82714	5.01664	4.67438	4.83117	4.42717	4.95881	4.42288	4.15248	4.7333	4.93276	4.71253	4.63847	4.76865	4.46689	4.75037	4.54568	4.54926	4.88535	4.46894	4.49422	4.12792	4.14784	4.87801	4.43488	4.42212	4.63512	4.82658
xanthosine	4.9364	5.37565	4.91018	5.20878	5.09379	5.1926	5.36369	5.03792	5.06008	4.56106	6.48312	4.63155	4.81523	5.27334	5.12184	5.04845	4.9366	4.71296	5.17895	4.78321	4.73876	4.74236	4.8221	4.67875	4.55361	6.12389	4.75729	4.55359	4.68626	4.64495	4.61324	4.87322	4.70998	4.65302	4.73995	4.60221	4.72254	4.64784	4.75288	4.75446	4.67199	4.8518	4.73291	4.43778	4.54463	4.3884	4.44793	4.65179	4.77119
L-Phenylalanine	8.33453	8.18193	8.48167	8.27903	8.33692	8.42441	8.25738	8.49018	8.40397	8.21563	8.45298	8.43009	8.22728	8.39901	8.31372	8.36644	8.36907	8.15791	8.4224	8.15927	8.23061	8.28464	8.14381	8.09276	8.08234	8.09374	8.24958	8.06744	8.20302	8.36627	8.22662	8.24327	8.28909	8.27306	8.24433	8.26071	8.21816	8.17563	8.1655	8.10837	8.14662	8.23663	8.02903	8.25591	8.14695	8.10089	7.93828	8.07468	8.2231
L-Proline	7.2812	7.60168	7.72571	7.54141	7.7078	7.47457	7.81408	7.48139	7.57866	7.66912	7.73059	7.76668	7.54132	7.53477	7.43751	7.34991	7.78158	7.37151	7.61364	7.3954	7.48475	7.39345	7.47967	7.31215	7.33351	7.37143	7.24644	7.20331	7.29838	7.56519	7.39002	7.48079	7.50531	7.23513	7.39363	7.40513	7.26415	7.51359	7.41527	7.43244	7.34512	7.41089	7.16374	7.2336	7.5532	7.47068	7.09255	7.39325	7.3186
Ascorbic acid	5.19889	4.98967	5.73673	5.19787	5.61206	5.38074	5.0586	5.51401	5.46355	5.39634	5.41309	5.44042	5.38476	5.2217	5.23431	5.04182	5.61195	5.30264	5.39562	5.18882	5.16273	4.94662	5.27427	5.20612	5.23899	5.15579	4.88257	5.0362	5.13842	5.24587	5.11387	5.30586	5.20629	5.13274	5.08908	5.22972	4.88539	5.23177	5.18812	4.95659	5.13392	5.16616	5.17208	4.98696	4.99912	5.01991	5.06792	5.08835	4.93604
creatine	6.82195	7.04499	6.86761	7.93343	7.47611	6.70083	7.07955	7.26797	6.8655	7.3337	7.17564	7.17851	7.55422	7.15706	7.13044	7.02871	7.05832	6.78173	6.73708	6.73063	7.06099	6.75795	6.59262	6.79524	6.83177	6.4432	6.91385	6.69476	7.09956	7.12487	6.79962	6.9306	6.85941	6.75298	6.96891	6.92498	6.61448	6.81175	7.22038	6.64965	6.81494	7.04805	7.00995	7.08543	6.75778	6.70978	6.66536	6.62855	6.33724
cystine (2)	5.14384	4.37283	5.00367	5.14359	5.16942	5.00256	4.97565	4.99501	4.88808	4.91594	5.10839	4.95113	5.14016	5.1854	5.00713	4.09919	5.11478	5.19471	5.23581	5.04375	4.65241	5.02806	4.99384	4.87231	4.76841	4.9288	4.68608	4.69082	4.84254	4.95687	4.93507	4.91401	4.97818	4.83638	4.9832	5.15515	4.73934	5.12146	4.82029	4.7364	4.99255	5.14203	4.92356	4.80587	4.91581	4.93118	4.3726	4.78547	4.35558
Urea	7.70825	7.91942	7.53139	7.84961	7.60724	7.76596	7.56924	7.5736	7.6445	7.44451	7.89247	7.44995	7.67637	7.90114	7.62721	7.75165	7.42623	7.52225	7.61735	7.35749	7.33874	7.92634	7.58678	7.54849	7.45371	7.49893	7.34758	7.48659	7.46491	7.41223	7.32314	7.6141	7.36498	7.46943	7.44023	7.51855	7.53954	7.5496	7.57	7.45998	7.57238	7.73387	7.35716	7.43131	7.45917	7.57298	7.37864	7.26734	7.65162
L-Kynurenine (1)	6.04919	6.19729	6.1171	5.93928	5.72826	6.05799	5.6511	5.84014	6.01352	5.78441	5.89781	5.92284	6.04751	6.20929	6.22408	6.01057	5.91657	5.83615	5.90458	5.85053	5.67805	5.83861	5.83767	5.94464	5.64962	5.67522	5.76635	5.6016	5.78366	6.01277	5.96083	5.874	6.02322	5.93334	5.83002	5.72157	5.75956	5.64094	5.77204	5.87709	5.90845	5.86556	5.63715	5.7374	5.63911	5.65464	5.59584	5.49011	6.03847
N-acetyl-glutamine	5.94146	6.0146	5.82897	6.12533	5.90053	6.10607	5.61946	5.81132	5.79223	5.77482	5.88432	5.61659	6.0362	6.23145	5.90026	6.00884	5.99274	5.6114	6.00961	5.71177	5.86804	5.9136	5.69081	5.73717	5.92256	5.43354	5.57747	5.59844	5.64377	5.91758	5.91711	5.985	5.80612	5.64608	5.88488	5.85768	5.63042	5.75477	5.70504	5.58948	5.67613	5.72072	5.53727	5.56923	5.56253	5.50071	5.47129	5.61214	5.38435
Succinic acid_neg	4.47278	4.85942	4.98648	4.63702	4.71825	4.81985	4.5447	5.00425	4.89727	4.81217	4.57718	4.74135	4.70441	4.82392	4.78062	4.63822	4.84022	4.72247	4.70278	5.78655	4.97709	4.66282	4.74065	4.20576	4.45534	4.50698	4.49701	4.57307	4.61256	4.55364	4.62355	4.67388	4.73402	4.53466	4.56418	4.6566	4.55071	4.32262	4.48218	4.73471	4.65301	4.78072	4.72217	4.4724	4.46368	4.30503	4.43703	4.55209	5.07028
Lysine + glutamine	7.077	6.99306	6.84813	7.05524	7.28491	7.26843	7.20292	6.67072	7.02331	7.14465	7.17115	7.02653	7.25055	7.21965	6.94248	7.03018	7.29317	6.9911	7.1911	7.00798	7.20855	6.90194	6.81581	6.80545	6.78596	6.86832	6.81315	6.85566	6.95124	6.9558	6.99164	6.97753	6.5439	6.94986	6.98229	7.01616	6.80112	6.9282	6.92651	6.85898	6.74068	6.70444	6.89533	6.79933	6.82639	6.85387	6.83932	7.03182	6.75986
mevalonic acid	6.67201	6.47604	6.81819	6.62587	6.67291	6.74621	6.60106	6.81115	6.7472	6.54006	6.80762	6.75872	6.56609	6.74969	6.64974	6.70188	6.72991	6.50224	6.78865	6.43901	6.53515	6.61362	6.44886	6.38135	6.36693	6.37107	6.57459	6.32414	6.47824	6.66293	6.50415	6.54775	6.58652	6.58657	6.57334	6.54565	6.53682	6.47668	6.44232	6.41719	6.42295	6.5148	6.3266	6.54611	6.33286	6.34993	6.29977	6.36593	6.54533
Glycerophosphocholine	6.8818	6.9542	7.26361	6.7972	6.97742	7.3136	7.4407	7.27643	7.25909	7.44151	7.12252	7.35099	7.30878	7.32644	7.36516	7.05774	6.91827	7.21526	7.15573	7.1135	6.90871	6.73614	7.05619	6.76944	6.85136	6.80435	5.63356	6.10201	7.13799	7.03672	6.8803	7.02336	7.18024	7.1097	6.9678	6.9833	6.76694	7.51046	7.07952	6.77352	7.00594	6.8622	7.09066	6.86994	6.80605	6.82302	5.80092	6.02578	5.48904
indole	6.94395	6.95409	7.10328	6.85386	7.18304	7.23875	6.91992	7.21519	7.02344	6.55521	6.98956	7.15398	7.20935	6.85008	6.83699	6.80767	7.2671	6.91991	7.16807	7.03757	7.34158	6.98815	6.86165	6.67357	6.65979	6.60782	6.70609	6.55705	6.92002	6.8901	7.08691	6.73587	7.02631	6.78998	6.75119	6.77665	6.90844	6.79488	6.93	6.87655	6.87531	6.84666	6.73223	6.71025	6.80667	6.66156	6.61105	6.71719	6.70825
uracil	5.90869	5.85834	5.82531	5.96172	5.99072	6.15168	5.97668	6.02556	5.89876	5.85916	5.91494	5.80077	5.96238	6.09953	5.89985	5.63546	6.03314	5.83433	5.94428	6.01106	5.76241	5.64343	5.98962	5.52065	5.56323	5.72665	5.73215	5.19648	6.04514	5.78745	5.92873	5.91899	5.85546	5.89156	5.76954	6.0788	5.85899	5.81686	5.8784	5.85364	5.86683	5.79884	6.00098	5.49767	5.44274	5.52397	5.65252	5.71009	5.65007
3-hydroxykynurenine	7.69089	7.63651	7.67355	7.65244	7.64431	7.50019	7.69916	7.72645	7.62622	7.60652	7.67686	7.6759	7.63798	7.63992	7.67222	7.68522	7.67192	7.69811	7.67092	7.69658	7.53091	7.64509	7.60407	7.63427	7.58686	7.53661	7.61361	7.44923	7.70838	7.75043	7.68707	7.64666	7.69172	7.62516	7.62923	7.75269	7.79592	7.67476	7.62543	7.72343	7.57292	7.60656	7.57176	7.56196	7.5422	7.47832	7.55532	7.62614	7.60958
1,4-diaminobutane	6.5283	6.34058	6.28866	6.72654	6.43634	5.93681	6.34907	6.27936	6.51512	6.37093	6.4455	6.32267	6.10945	6.55497	6.53724	6.6028	6.43202	6.33773	6.2818	6.51079	6.50048	6.11771	6.01224	6.3593	5.8854	6.1585	5.75664	6.0525	6.36149	5.91568	5.92561	6.27658	5.85271	6.35093	6.29495	6.79458	6.37514	6.59326	6.48438	5.9636	5.9591	5.93543	6.35282	5.82483	5.88879	5.78863	5.70938	6.03652	6.2024
beta aminobutyric acid	6.18199	6.25096	6.36283	6.1548	6.37366	6.40837	6.36734	6.32385	6.27385	6.45773	6.40174	6.3373	6.2965	6.41159	6.35113	6.0163	6.19738	6.19422	6.38032	6.08918	5.80208	5.95316	6.09656	5.70637	5.73596	6.13689	5.7777	5.79693	6.05405	5.98876	5.97257	6.02398	6.07245	6.08597	5.78662	6.05806	5.79705	6.02853	5.93023	6.02384	6.03756	6.06227	6.0128	5.82226	5.87915	5.92015	5.68569	5.87174	5.93041
L-Arginine (1)	7.03592	6.9153	7.62537	7.0509	7.35988	7.18006	6.82508	7.35876	7.29702	6.89424	7.07027	7.42264	7.12238	7.16155	7.0371	5.73685	7.42374	7.0741	7.18749	6.48754	6.75275	6.46685	6.6181	6.30038	6.69152	6.4696	6.40398	6.32227	6.5725	6.66574	6.61881	6.62625	6.65717	6.77145	6.55773	6.62317	6.44294	6.4251	6.5437	6.51377	6.495	6.42289	6.51576	6.36473	6.60074	6.45693	6.31876	6.48476	6.1469
L-Homoserine	4.95462	4.70914	4.97155	4.99183	4.92837	5.07597	4.91403	5.05751	5.0033	4.24651	5.10471	5.07544	4.93675	4.94241	4.87874	5.06641	5.07304	4.83087	5.1287	4.6143	4.66039	4.68052	4.55411	4.51989	4.50202	4.49263	4.6416	4.56254	4.58969	4.83518	4.60875	4.56804	4.7378	4.72317	4.70845	4.71865	4.62479	4.54072	4.67647	4.46659	4.59654	4.64288	4.40756	4.75297	4.68428	4.56376	4.46707	4.50769	4.75088
5-Hydroxy-L-tryptophan	4.9785	5.01072	5.09065	4.78902	5.17471	5.21502	4.82072	5.10831	4.92836	4.83144	4.95738	5.13909	5.20092	4.69384	4.7437	4.59199	5.17248	4.89779	5.07466	4.62187	5.33972	4.78424	4.58617	4.43565	4.63587	4.72959	4.39672	4.34701	4.54985	4.52643	4.71829	4.47939	4.87719	4.72576	4.68551	4.32148	4.44371	4.27805	4.10897	4.47598	4.64492	4.6251	4.73464	4.64035	4.79295	4.65206	4.39079	4.40325	4.37616
Inosine	7.08524	6.12359	4.90428	6.1327	6.46821	6.95571	6.99128	4.33448	6.60223	4.8284	7.28852	4.94401	7.23891	5.45744	6.66201	7.24708	5.47734	6.86812	7.19555	4.03856	4.3084	5.08857	5.00889	4.16763	3.71443	4.98288	4.17605	3.95526	4.51256	4.42753	4.26063	4.68645	4.22301	4.51781	4.15666	4.19362	4.36023	4.21605	4.01159	4.40292	4.97924	5.03954	7.09455	3.73164	3.96522	3.80473	4.31643	4.64038	4.97083
betaine	7.75338	7.75818	7.82491	7.6272	7.73251	7.62333	7.67072	7.49408	7.87455	7.66887	7.6923	7.60144	7.76156	7.74699	7.95905	7.82897	7.74661	7.65067	7.69209	7.66907	7.9828	7.51233	7.58306	7.51706	7.43371	7.38382	7.58006	7.43444	7.54833	7.40491	7.80946	7.48609	7.52443	7.51511	7.55913	7.72873	7.48896	7.80359	7.63572	7.87858	7.41371	7.41593	7.38922	7.4229	7.61088	7.40506	7.33663	7.67703	7.60385
L-Lactic acid_neg	5.70119	5.87628	5.63132	5.94294	5.77643	6.10095	5.86635	5.79172	5.88833	5.82261	5.70683	5.80845	5.95849	5.96988	5.88094	5.73471	5.74434	5.77349	5.87073	5.589	5.69836	5.90607	5.574	5.41933	5.57531	5.62228	5.56056	5.46945	5.73549	5.66717	5.87176	5.66566	5.83844	5.61216	5.67465	5.6804	5.68225	5.5571	5.70736	5.62516	5.68019	5.83905	5.78521	5.48262	5.59586	5.69476	5.56416	5.79388	5.65329
3-Aminoisobutanoic acid	5.42209	5.54518	5.6236	5.39867	5.58312	5.64999	5.57003	5.55035	5.55007	5.69947	5.62927	5.59348	5.50603	5.64037	5.59671	5.33707	5.44549	5.40289	5.62605	5.33106	5.09363	5.31095	5.30274	5.08821	5.17131	5.31401	5.14802	5.15574	5.38873	5.37534	5.39777	5.39291	5.39172	5.31072	5.26271	5.31483	5.17293	5.27694	5.2186	5.23078	5.23027	5.29241	5.21404	5.21298	5.19763	5.20045	5.14992	5.14727	5.25787
Aminoadipic acid_1	5.85771	6.0029	5.87201	5.81257	5.86834	5.85924	5.93149	5.78882	5.93962	5.92365	5.90789	5.87766	5.90531	5.87592	5.91009	5.97641	5.78176	5.91384	5.8234	5.51985	4.93555	5.54412	5.35401	5.5537	5.25617	5.54338	5.2414	4.98551	5.26766	5.04876	5.12562	5.67097	5.2145	5.1424	4.98238	5.28979	5.63283	5.17806	5.42464	5.80538	4.99066	5.60328	5.16002	5.2591	5.0776	5.25686	5.15596	5.06116	5.07166
Gamma-Aminobutyric acid	6.77309	6.83783	6.95716	6.74778	6.91778	6.9698	6.93026	6.90852	6.85837	7.03224	6.98569	6.92776	6.8559	6.9811	6.92297	6.604	6.77149	6.77483	6.9728	6.6568	6.32953	6.49599	6.60116	6.31458	6.35028	6.69737	6.32935	6.37254	6.59736	6.5677	6.50291	6.52195	6.66255	6.65341	6.38698	6.62601	6.35037	6.58984	6.47713	6.52395	6.59906	6.67003	6.54968	6.34546	6.50775	6.44065	6.33034	6.44822	6.49359
Glutamate	6.81097	7.26551	7.57585	7.03327	7.19464	6.93647	7.22357	7.3899	7.33626	7.41644	7.21122	7.5978	7.00799	7.18975	7.48267	6.91553	7.323	7.41613	7.29438	6.38497	6.60441	6.48545	6.71427	6.68519	6.60659	6.33637	6.12404	6.36632	6.63087	6.37086	6.69507	6.62098	7.16115	6.39036	6.33646	6.63378	6.36281	6.50559	6.41548	6.54749	6.58801	6.59224	6.60706	6.33504	6.46835	6.45352	6.00959	6.1456	6.14987
riboflavin	5.11034	5.22224	5.2016	5.27205	5.17164	4.95936	5.04352	5.16389	5.30682	5.32754	5.18739	5.34493	5.20219	5.086	5.39526	5.11014	5.03719	5.24416	5.16997	4.63976	4.44315	4.45764	4.815	4.73022	4.51993	4.54087	4.69772	4.84421	5.8695	4.70693	4.82727	4.4172	4.4797	4.39808	5.0148	4.49319	4.53557	4.46082	4.50446	4.50169	4.30963	4.64473	4.94019	4.53307	4.32469	4.70124	4.58696	4.95451	4.6057
1-Methylnicotinamide	6.82829	7.18368	6.7296	6.85305	7.25299	7.06822	7.36637	6.16226	7.14424	6.69951	7.23836	7.07882	6.9584	6.63715	7.3256	6.87847	6.68674	6.85314	7.20088	5.57544	5.81268	6.17321	5.67332	5.51462	4.45983	5.80207	5.86222	5.63169	5.72218	5.86419	5.63328	5.92835	4.97657	5.73498	5.65773	5.20481	5.89653	5.58749	5.87475	5.60872	5.86151	5.78636	7.02445	4.86463	5.71947	4.89515	5.72628	5.83061	5.96526
hypoxanthine	7.01157	7.34803	6.91338	7.0267	7.43863	7.24578	7.5599	6.36105	7.31377	6.87411	7.42048	7.26242	7.14139	6.83211	7.48937	7.07163	6.88256	7.00558	7.36562	5.71071	5.9958	6.35432	5.87466	5.67489	4.86812	5.9827	5.99293	5.79007	5.96361	6.06762	5.7483	6.12325	5.18449	5.91585	5.896	5.39363	6.06419	5.76081	6.05833	5.83186	6.00805	5.91658	7.21496	4.8803	5.8877	5.15946	5.94548	5.97329	6.18699
1-Methyladenosine	6.15402	5.86769	6.01309	6.19002	5.93548	6.30247	5.88824	6.10481	6.27335	5.7863	5.7623	5.96929	6.32551	6.13235	6.07376	5.70349	6.13726	6.1539	5.84198	5.50493	5.59347	5.80888	5.59862	5.32461	5.50193	5.34317	5.33041	5.21438	5.6365	5.73555	5.50213	5.63306	5.69973	5.48902	5.78454	5.56135	5.74412	5.65852	5.56193	5.50934	5.61139	5.39834	5.22503	5.4844	5.39341	5.38113	5.16987	5.0892	5.40475
creatinine	6.99951	7.1634	6.97223	6.8228	6.78977	6.8596	6.61818	6.71982	6.76529	6.83694	6.90939	6.66493	6.89114	7.10159	6.9661	6.93373	6.87236	6.67788	7.07061	6.62426	6.54801	6.86884	6.44606	6.56645	6.52466	6.41492	6.29935	6.50335	6.5173	6.4928	6.42348	6.67468	6.55397	6.48783	6.54327	6.47871	6.43192	6.63898	6.49857	6.49869	6.56961	6.58724	6.32787	6.3121	6.47324	6.50717	6.33813	6.41895	6.49254
Deoxyribose 1-phosphate_neg	4.87449	4.89893	4.92278	4.87143	4.96663	4.86454	4.84258	4.75751	4.82089	4.90196	4.86759	4.95345	4.85187	4.93741	4.89323	4.74533	4.76586	4.87295	4.98118	4.74347	4.37712	4.54668	4.6416	4.42123	4.43671	4.77075	4.45036	4.44409	4.72756	4.58966	4.57421	4.63394	4.51848	4.66233	4.57078	4.70054	4.44339	4.29212	4.52458	4.62558	4.65292	4.57169	4.5156	4.48196	4.40081	4.49519	4.37399	4.6018	4.79706
D-glucuronic acid	8.28914	8.41778	8.36785	8.14234	8.64258	8.22684	8.69923	8.28499	8.77641	8.25163	8.27098	8.32538	8.32243	8.22725	8.93849	8.47217	8.13788	8.47642	8.66618	6.86898	6.47769	7.15455	7.888	7.0668	6.35172	6.68501	6.90749	7.1049	7.31647	7.60473	7.9348	7.45289	8.28912	7.33394	7.30912	7.10841	7.41428	6.86742	6.06877	8.14494	7.34659	8.13196	6.0928	7.1659	6.67934	7.32841	6.56881	7.87048	8.34723
L-Alanine	6.23721	6.34582	6.53609	6.68663	6.57195	6.30624	6.47478	6.41665	6.42657	6.53576	6.47216	6.55214	6.5229	6.48237	6.57545	6.23371	6.49304	6.31725	6.45996	6.04206	6.33341	6.15993	6.06628	5.96701	6.14638	6.08082	6.09644	5.94221	6.21522	6.1947	6.24029	6.1459	6.24697	5.97185	6.16288	6.07051	5.95632	6.08123	6.2336	5.97068	6.10163	6.20303	6.08774	6.13336	6.0997	6.1215	5.91616	6.16838	6.09431
Pipecolic acid	7.64143	7.74983	7.46319	7.71009	7.92449	7.86072	7.8928	7.32475	7.53308	7.93444	7.92758	7.82293	7.71368	7.8443	7.81882	7.94658	7.64666	7.70388	8.05258	7.51584	7.6062	7.42901	7.21031	7.1081	7.05844	7.33356	6.76525	7.01112	7.33677	7.22776	7.13512	7.16742	7.09918	7.41423	7.23599	7.30127	7.09096	7.21757	7.26376	7.38594	7.41934	7.16625	7.31525	7.10379	7.12732	7.08117	6.93773	6.99816	6.94365
sarcosine	6.22889	6.36888	6.54472	6.75303	6.56524	6.28891	6.51178	6.45156	6.44437	6.61529	6.51104	6.60252	6.56148	6.54168	6.61878	6.29735	6.53709	6.34766	6.52156	6.04965	6.35366	6.19522	6.09185	5.95197	6.13872	6.05584	6.12171	5.92933	6.27146	6.24767	6.32446	6.16934	6.27894	6.00545	6.2374	6.12036	5.96057	6.1272	6.28097	6.00279	6.11092	6.24323	6.13507	6.20539	6.07714	6.12425	5.94163	6.20947	6.0927
N-Acetylglutamic acid (1)_neg	5.12865	5.12773	4.895	5.20883	5.36573	5.2971	5.27381	4.84738	5.21297	5.36016	5.3802	5.31583	5.15466	5.25469	5.36955	5.32874	5.1062	5.15984	5.52974	4.7261	4.7758	4.22809	4.90389	4.53603	4.76706	4.98544	4.36981	4.4535	4.50115	3.96328	3.95808	4.1618	3.86957	4.60801	3.95193	4.4581	4.01979	3.9964	4.12071	4.48961	4.63289	4.61443	4.96845	4.70751	4.60446	4.70499	4.1015	4.50589	4.58294
Imidazole	7.42703	7.38442	7.5155	7.54993	7.49536	7.55584	7.45897	7.46299	7.5065	7.43284	7.49982	7.4464	7.50294	7.54642	7.48776	7.57396	7.50803	7.52774	7.52125	7.41627	7.5541	7.35093	7.3273	7.33727	7.35245	7.34998	7.32467	7.35415	7.29935	7.32343	7.41302	7.47675	7.38191	7.35443	7.43866	7.42787	7.35908	7.32665	7.41692	7.33825	7.30551	7.30602	7.31203	7.30155	7.35022	7.32384	7.29598	7.38133	7.34313
methylsuccinic acid	5.39332	5.61868	5.44628	6.48897	6.07481	5.33696	5.65178	5.82574	5.46796	5.94234	5.73592	5.74501	6.13315	5.74699	5.72407	5.62483	5.62605	5.3697	5.33211	5.06824	5.37722	4.98252	4.83568	5.0568	5.12364	4.62508	5.15139	4.93205	5.45363	5.44901	5.13456	5.23568	5.18863	5.00747	5.30857	5.2402	4.82613	5.03713	5.52305	4.8589	5.05247	5.28337	5.28085	5.32268	4.94647	4.88293	4.87794	4.85113	4.53728
Metanephrine	6.53192	6.67956	6.49002	6.55573	6.58612	6.56526	6.58208	6.6748	6.57482	6.80351	6.44868	6.5725	6.50615	6.45885	6.52264	6.64514	6.58049	6.47929	6.54723	6.01859	4.67152	6.93823	4.79571	5.89015	6.38047	4.7794	6.3086	6.03023	6.28295	5.24152	6.35052	6.7157	6.07516	4.78879	4.6597	6.38537	4.86877	6.3223	5.01636	4.72719	4.63212	4.92661	6.37374	6.54788	4.70298	5.9631	6.49908	6.24001	5.25153
palmitic acid_neg	7.45198	7.3616	7.44141	7.40921	7.60075	7.47577	7.41081	7.46427	7.4594	7.52785	7.37141	7.4572	7.52674	7.33699	7.74282	7.5079	7.30416	7.41525	7.53927	7.21991	6.93146	7.06654	7.40398	6.99493	7.00169	7.1381	7.17664	6.9874	7.19017	6.90685	7.41401	6.83991	6.84299	7.07285	6.96225	7.0459	7.46475	7.19016	7.38372	6.89172	7.10055	7.11255	7.4326	6.99278	6.81658	7.13155	7.08153	7.31115	6.93645
histamine	4.63753	4.87853	4.97744	4.7075	4.66309	4.70441	4.65421	4.45302	4.64598	4.81459	4.88503	4.57899	4.55101	4.79727	4.94041	5.04103	4.55131	4.66314	4.63461	5.69652	6.37911	4.63834	4.43453	3.92309	4.23197	4.06358	4.27608	4.3891	4.22467	4.29674	4.54417	4.13868	4.4149	4.45003	4.355	4.48719	4.59369	4.25174	4.1368	4.45579	4.56648	4.3621	4.25389	4.1924	4.3452	4.30951	4.23877	4.05238	4.09412
AICA-riboside	5.12176	5.28966	5.19954	5.09605	5.22824	5.19786	5.21954	5.10153	5.24786	5.24306	5.15587	5.24649	5.16633	5.20667	5.26715	5.20435	5.08162	5.15809	5.23	5.04383	4.69668	5.39338	5.17741	4.97186	4.95774	4.93525	4.83946	4.80968	4.79869	4.90995	4.90809	5.10532	4.95649	4.8332	5.25476	4.7653	4.79404	4.86298	4.66623	5.0282	5.18324	5.20292	4.7871	4.81424	5.03213	4.81792	4.84595	4.87168	4.87408
[truncated: 5 more columns]

## Sheet: covid
Sample/metabolite Name	CoV 108	CoV 108	CoV 108	CoV 16	CoV 16	CoV 16	CoV 32	CoV 32	CoV 32	CoV 415	CoV 415	CoV 415	CoV 40	CoV 40	CoV 40	CoV 119	CoV 119	CoV 119	CoV 235	CoV 235	CoV 235	CoV 284	CoV 284	CoV 284	CoV 248	CoV 248	CoV 248	CoV 37	CoV 37	CoV 37	CoV 264	CoV 264	CoV 264	CoV 100	CoV 100	CoV 100	CoV 83	CoV 83	CoV 83	CoV 282	CoV 282	CoV 282	CoV 218	CoV 218	CoV 218	CoV 228	CoV 228	CoV 228	CoV 283
	1	2	3	4	5	6	7	8	9	10	11	12	13	14	15	16	17	18	19	20	21	22	23	24	25	26	27	28	29	30	31	32	33	34	35	36	37	38	39	40	41	42	43	44	45	46	47	48	49
Mevalonolactone	2.98369e+06	2.74642e+06	2.71386e+06	3.50507e+06	2.76699e+06	3.26246e+06	2.64757e+06	2.75183e+06	2.69305e+06	2.62181e+06	2.07146e+06	2.35022e+06	2.95485e+06	2.90572e+06	2.94799e+06	2.62873e+06	2.76254e+06	1.44189e+06	2.91669e+06	2.91819e+06	2.7e+06	2.87455e+06	2.43412e+06	1.94341e+06	3.13499e+06	2.52771e+06	2.38566e+06	2.8276e+06	2.36773e+06	2.61595e+06	2.95403e+06	2.92272e+06	2.46636e+06	2.72498e+06	3.03663e+06	2.86769e+06	2.84803e+06	2.44705e+06	2.56e+06	2.75165e+06	2.47695e+06	2.4718e+06	3.4227e+06	2.36765e+06	2.47477e+06	3.25746e+06	3.08562e+06	2.96398e+06	2.52463e+06
inositol	656817	622359	459411	680116	681922	700912	754371	681436	651365	593182	613920	485677	564321	649148	598838	597017	565826	617344	571036	648297	637981	675280	667654	482551	653253	638134	613752	663370	714228	641095	854447	620813	540860	652774	588781	514338	654137	755774	662345	615118	618198	461044	669408	684233	623816	662580	598247	559779	531404
L-Dihydroorotic acid_neg	2.75261e+06	2.62264e+06	1.73392e+06	2.34903e+06	2.22195e+06	2.00954e+06	2.21973e+06	2.17527e+06	1.78625e+06	2.3719e+06	2.12554e+06	1.76276e+06	3.06875e+06	2.44191e+06	2.24363e+06	2.96424e+06	2.67187e+06	1.98518e+06	2.77785e+06	2.2932e+06	1.92824e+06	2.71128e+06	2.62966e+06	1.97399e+06	2.55654e+06	2.20194e+06	1.9363e+06	2.45789e+06	2.32976e+06	2.20224e+06	2.61894e+06	2.84879e+06	1.65873e+06	2.50469e+06	2.29686e+06	1.90752e+06	2.75467e+06	3.0056e+06	2.25113e+06	2.42664e+06	2.22134e+06	1.7544e+06	2.89345e+06	2.53153e+06	2.17202e+06	2.07266e+06	2.24911e+06	1.65261e+06	2.27073e+06
5-methoxytryptophan (2)	830281	939672	824503	1.55176e+06	1.18775e+06	1.01489e+06	878250	1.17726e+06	1.00546e+06	1.01529e+06	770148	723062	657961	764506	709810	888588	925861	818670	1.07674e+06	1.02007e+06	709476	993712	892484	564280	1.09947e+06	856394	798785	844122	981188	795216	1.09658e+06	988802	728986	984454	977196	760687	1.00853e+06	941003	815150	1.05046e+06	873915	709899	1.01835e+06	890252	936299	1.34266e+06	1.16451e+06	1.00249e+06	771388
carnosine	6.0626e+06	4.56852e+06	3.53525e+06	4.8852e+06	5.03398e+06	4.57817e+06	4.13464e+06	4.33585e+06	4.39321e+06	4.07248e+06	4.16304e+06	3.57497e+06	4.23817e+06	4.36487e+06	4.25992e+06	4.01649e+06	4.33849e+06	2.89488e+06	4.8372e+06	4.80257e+06	3.83541e+06	4.70077e+06	4.48318e+06	3.28765e+06	6.1754e+06	4.52219e+06	4.10365e+06	4.29545e+06	4.44414e+06	4.58149e+06	4.86957e+06	4.5225e+06	3.69087e+06	4.35001e+06	4.41107e+06	4.09715e+06	4.19029e+06	4.57999e+06	4.34815e+06	5.74263e+06	4.51733e+06	3.55908e+06	4.70973e+06	4.5069e+06	4.36255e+06	4.59419e+06	4.65436e+06	4.56841e+06	5.9511e+06
aminoimidazole carboxamide ribonucleotide	2.64635e+07	2.45096e+07	1.13264e+07	1.01705e+07	2.61519e+07	1.34767e+07	9.81903e+06	2.79161e+07	1.51268e+07	3.24683e+07	2.00918e+07	1.44827e+07	1.35291e+07	3.45283e+07	2.03989e+07	3.91437e+07	2.6761e+07	9.76497e+06	3.04865e+07	1.6896e+07	8.86144e+06	2.23944e+06	917568	633504	3.95932e+07	2.3541e+07	1.43633e+07	7.89686e+06	2.23694e+07	1.18226e+07	3.61668e+07	2.05227e+07	1.23259e+07	2.11145e+07	2.26842e+07	1.39326e+07	1.50288e+07	2.17364e+07	1.32245e+07	3.78209e+07	2.33631e+07	1.54584e+07	3.45589e+07	2.14348e+07	1.35819e+07	2.66804e+07	1.43956e+07	8.71083e+06	3.98818e+07
Imidazoleacetic acid	2.09936e+07	2.34068e+07	1.95323e+07	2.17261e+07	2.25544e+07	2.21349e+07	1.7094e+07	2.03941e+07	1.76335e+07	2.31006e+07	2.25163e+07	1.60259e+07	1.91058e+07	2.25944e+07	2.20497e+07	2.22763e+07	2.2145e+07	1.65576e+07	2.75815e+07	2.56832e+07	2.20657e+07	2.22168e+07	1.90298e+07	1.61245e+07	2.68654e+07	2.26899e+07	2.31219e+07	1.99003e+07	2.43764e+07	2.32469e+07	2.58937e+07	2.23079e+07	1.96601e+07	2.21006e+07	2.26429e+07	2.12278e+07	2.2309e+07	2.17871e+07	1.91269e+07	2.3207e+07	2.30952e+07	1.67369e+07	2.44647e+07	2.5369e+07	2.30424e+07	2.11465e+07	2.3737e+07	2.37006e+07	2.11364e+07
cystathionine	2.45021e+06	2.45109e+06	2.08504e+06	2.78459e+06	2.63047e+06	2.70244e+06	2.51447e+06	2.75155e+06	2.52093e+06	2.41434e+06	2.22608e+06	1.86214e+06	2.13593e+06	2.61173e+06	2.33729e+06	1.86095e+06	2.1344e+06	1.10053e+06	3.17781e+06	3.00522e+06	2.1995e+06	2.8887e+06	2.55992e+06	2.10634e+06	2.39211e+06	2.50839e+06	2.11345e+06	2.07506e+06	2.74226e+06	2.40452e+06	3.19883e+06	2.84418e+06	2.08672e+06	2.56126e+06	2.65855e+06	2.21819e+06	2.48327e+06	2.1843e+06	2.18835e+06	2.57544e+06	2.35835e+06	1.74234e+06	2.66999e+06	2.56627e+06	2.44049e+06	3.23902e+06	2.97184e+06	2.93864e+06	2.81335e+06
D-Sedoheptulose 7-phosphate (1)_neg	148423	115847	74185.4	119234	147988	86652	126821	111826	121351	157800	98249.9	84832.6	129023	123086	121318	149738	120360	121781	128066	108525	85173.2	158423	126482	56560.2	127123	146491	75532.3	156509	93442.3	144038	109984	90852.8	95572.9	122275	117028	106324	126289	151038	134333	146559	118728	93676	105657	103929	141887	94165.6	85075.2	84060.1	136495
suberic acid	1.07552e+06	965221	937855	1.19765e+06	970060	947608	844442	845887	720544	1.04044e+06	1.02366e+06	929558	1.07244e+06	1.01586e+06	945468	1.53931e+06	1.04742e+06	947911	1.13418e+06	1.09898e+06	951840	951330	1.0159e+06	692728	1.29179e+06	1.04111e+06	997049	1.2017e+06	1.0758e+06	1.09521e+06	1.25771e+06	1.09995e+06	900261	958866	810591	1.13897e+06	1.05707e+06	1.31563e+06	1.02989e+06	1.09653e+06	1.05683e+06	1.08253e+06	1.07575e+06	1.33214e+06	1.03384e+06	1.03639e+06	1.24141e+06	936050	961748
Methionine sulfoxide	475801	636051	705161	1.26117e+06	1.66698e+06	1.72296e+06	1.18174e+06	1.53077e+06	1.76974e+06	1.22668e+06	1.40325e+06	941272	580558	786996	1.04329e+06	811084	825235	630146	525631	654652	478918	1.06107e+06	1.35917e+06	884790	821282	938165	661654	885000	958364	1.17054e+06	747665	851319	645906	762293	985286	894301	303123	733152	530737	1.1561e+06	987166	1.15683e+06	576011	751547	649895	285527	583357	263865	895208
glucosamine	1.77474e+06	1.8931e+06	1.47328e+06	2.18709e+06	2.20034e+06	2.00913e+06	1.22385e+06	1.84973e+06	1.61473e+06	1.59437e+06	1.62218e+06	1.56204e+06	1.30408e+06	1.81324e+06	1.59439e+06	1.1876e+06	1.07203e+06	467006	1.95305e+06	2.05121e+06	1.76904e+06	1.56862e+06	1.48608e+06	1.33742e+06	2.14692e+06	1.96862e+06	2.02526e+06	1.82276e+06	2.33829e+06	2.52629e+06	1.73695e+06	1.71106e+06	1.34566e+06	1.63194e+06	1.81552e+06	1.76288e+06	1.44886e+06	1.40219e+06	1.73569e+06	2.03671e+06	1.81176e+06	1.50035e+06	2.1665e+06	1.85473e+06	1.81652e+06	2.33591e+06	2.47221e+06	2.1247e+06	1.26229e+06
L-Serine	825673	834198	747374	1.24369e+06	1.23275e+06	1.29991e+06	1.41367e+06	1.80668e+06	1.68671e+06	1.0301e+06	1.07426e+06	1.07257e+06	1.44078e+06	1.56474e+06	1.59355e+06	739672	883907	736353	1.46777e+06	1.50309e+06	1.32697e+06	1.34595e+06	1.30234e+06	1.0549e+06	1.38842e+06	1.46455e+06	1.2686e+06	1.52209e+06	1.5735e+06	1.54883e+06	1.37794e+06	1.41691e+06	1.29327e+06	1.64209e+06	1.60851e+06	1.47358e+06	930893	961205	950271	1.37257e+06	1.33544e+06	1.17215e+06	1.58261e+06	1.54335e+06	1.49049e+06	793287	768338	748714	1.58144e+06
homovanillic acid_neg	466929	424804	393151	516480	552911	608067	381385	497084	496222	607286	639645	459548	486720	421230	412721	512277	489838	396777	558112	531866	530016	494986	474662	308258	589473	527813	514444	454675	621395	518816	617375	576079	519527	647780	648963	492464	438433	389102	475656	487390	458226	479783	714983	702472	698640	629400	555524	525305	468280
D-Glyceraldehyde 3-phosphate_neg	140012	191169	120927	142556	171565	161865	113958	200293	152392	142241	117889	121790	136856	157474	179355	243489	193277	163160	196997	152213	104929	199061	225536	122310	267780	177537	130102	106430	165105	112054	160039	160918	110596	261784	141412	171986	198775	170543	104652	180002	147157	99678.3	126218	232958	148100	276507	156908	100066	150664
L-Homocysteic acid	550688	531996	473778	613746	376009	467096	464656	581850	574412	409434	320040	302740	487353	399607	401548	360081	394693	389020	411939	504366	503053	479001	416867	377354	537260	552953	474810	430280	667855	552758	727665	530730	386201	445474	479462	492148	477391	410093	425492	447825	509137	427716	520681	640648	501501	587714	506969	532482	323968
Phosphorylcholine	4.8049e+07	3.27493e+08	1.60984e+08	1.10217e+07	1.61279e+08	2.277e+08	1.77238e+07	2.78066e+08	1.62806e+08	1.31135e+08	1.13096e+08	8.4594e+07	2.48661e+07	2.31904e+08	2.15234e+08	4.1279e+07	3.30043e+08	1.51263e+08	5.55895e+07	3.44461e+08	1.20516e+08	1.90812e+08	2.25631e+08	9.6181e+07	8.26959e+07	3.65473e+08	1.48798e+08	2.56445e+07	2.27374e+08	1.97567e+08	9.05608e+07	2.23497e+08	1.5083e+08	2.88457e+07	3.57376e+08	2.06591e+08	2.44783e+07	3.06802e+08	2.00349e+08	1.29084e+08	2.15197e+08	8.08678e+07	5.00064e+07	2.23648e+08	1.05476e+08	4.8319e+07	2.87687e+08	1.34813e+08	1.5465e+08
pyridoxine	1.9921e+06	1.96633e+06	1.6656e+06	1.68333e+06	1.88436e+06	1.86787e+06	3.81275e+06	3.69746e+06	4.10885e+06	2.27598e+06	2.30335e+06	1.16365e+06	2.47564e+06	2.42203e+06	2.57547e+06	3.03232e+06	2.80631e+06	2.47681e+06	2.20825e+06	2.31276e+06	1.83252e+06	3.27496e+06	3.41742e+06	1.18052e+06	2.47261e+06	2.24559e+06	1.9258e+06	1.98474e+06	2.071e+06	2.18257e+06	2.45419e+06	2.6056e+06	1.48759e+06	3.4192e+06	3.5363e+06	3.4437e+06	1.74247e+06	2.08239e+06	1.81532e+06	3.40403e+06	2.95882e+06	1.96238e+06	2.65224e+06	2.71919e+06	2.41015e+06	1.0622e+06	1.07174e+06	686796	3.40774e+06
L-Alpha-aminobutyric acid	3.69849e+06	3.42579e+06	3.37035e+06	4.42608e+06	4.73449e+06	5.06397e+06	4.6481e+06	4.53226e+06	4.79196e+06	2.90263e+06	3.17818e+06	3.2867e+06	4.70401e+06	5.07494e+06	5.19812e+06	4.90667e+06	4.89603e+06	4.7041e+06	4.43836e+06	4.24601e+06	4.49912e+06	3.60576e+06	3.94057e+06	4.46288e+06	4.28332e+06	4.01878e+06	4.4425e+06	5.41267e+06	5.59136e+06	5.63259e+06	5.14543e+06	5.2145e+06	5.0077e+06	4.61742e+06	4.76472e+06	4.98024e+06	3.82096e+06	4.34389e+06	4.16255e+06	5.6677e+06	6.10343e+06	6.15414e+06	4.6815e+06	4.76034e+06	4.75381e+06	2.97161e+06	2.92651e+06	2.80447e+06	3.14202e+06
Orotic acid_neg	813743	871775	785661	1.06474e+06	777009	647919	793851	735314	716940	795988	735316	563480	687134	732882	739622	689053	524425	509464	861734	700630	783716	879701	645978	569620	605915	911992	588843	753579	799367	956478	851926	767906	657259	912828	641813	766910	991525	839199	680217	713437	853851	500025	815150	836404	696805	893700	703531	561505	661690
choline	5.78004e+07	5.78012e+07	6.02605e+07	6.65499e+07	6.5514e+07	7.30019e+07	8.51848e+07	9.36863e+07	9.61038e+07	5.23644e+07	5.68142e+07	5.32478e+07	8.02184e+07	8.89447e+07	9.21552e+07	9.49854e+07	9.40223e+07	9.38698e+07	8.77958e+07	8.43794e+07	9.50258e+07	7.10806e+07	7.76647e+07	8.62539e+07	7.08397e+07	6.69656e+07	8.23504e+07	1.007e+08	1.12372e+08	1.12766e+08	9.56788e+07	1.07478e+08	9.31989e+07	8.29629e+07	8.53409e+07	9.11545e+07	7.18204e+07	7.03921e+07	7.46177e+07	9.10968e+07	9.2933e+07	1.02126e+08	8.3091e+07	8.49354e+07	8.62382e+07	4.18216e+07	4.12265e+07	4.17375e+07	5.90506e+07
L-Threonine	2.31239e+06	2.07151e+06	2.15464e+06	1.48686e+06	1.44539e+06	1.5459e+06	2.97864e+06	3.30208e+06	3.04361e+06	2.22023e+06	2.18086e+06	1.92871e+06	2.90691e+06	3.15852e+06	3.32375e+06	2.63294e+06	2.15603e+06	2.38195e+06	2.64962e+06	2.4041e+06	2.17939e+06	2.90059e+06	2.94565e+06	2.19635e+06	2.06197e+06	2.06487e+06	1.69791e+06	2.33994e+06	2.26358e+06	2.31343e+06	2.09646e+06	2.08412e+06	1.59521e+06	2.52192e+06	2.49536e+06	2.40436e+06	3.03709e+06	3.13585e+06	3.12508e+06	2.87504e+06	2.23616e+06	1.77921e+06	2.41157e+06	2.41681e+06	2.10212e+06	1.66775e+06	1.57835e+06	1.34498e+06	4.15202e+06
purine	6.85198e+06	6.80222e+06	7.03391e+06	4.67116e+06	4.98138e+06	4.82977e+06	9.39161e+06	9.94704e+06	1.0144e+07	6.62112e+06	6.56599e+06	6.65735e+06	6.93974e+06	6.70431e+06	7.6555e+06	8.35232e+06	8.42165e+06	9.06915e+06	5.99756e+06	5.77212e+06	5.73597e+06	9.85833e+06	1.04604e+07	1.00536e+07	8.24976e+06	8.4062e+06	8.53027e+06	5.24213e+06	5.40362e+06	5.69763e+06	9.91566e+06	9.46721e+06	9.59344e+06	8.52956e+06	8.73744e+06	8.9519e+06	5.35454e+06	5.54918e+06	5.67006e+06	8.92583e+06	8.48719e+06	7.955e+06	6.80394e+06	7.05193e+06	6.78554e+06	7.27928e+06	7.65715e+06	7.05078e+06	7.79477e+06
aspartate	540868	475475	449645	917055	966520	1.00087e+06	1.63201e+06	1.65006e+06	1.67089e+06	1.4396e+06	1.38992e+06	1.28004e+06	1.38241e+06	1.28611e+06	1.362e+06	663077	673131	628075	1.72317e+06	1.74498e+06	1.79759e+06	888081	900160	475624	1.82109e+06	1.66931e+06	1.50073e+06	1.26873e+06	1.54346e+06	1.33835e+06	1.87865e+06	1.86849e+06	1.57901e+06	2.02799e+06	2.13539e+06	1.87343e+06	610579	571734	555110	1.10636e+06	1.28974e+06	831413	2.40301e+06	2.04058e+06	2.25068e+06	258271	252982	287903	1.20043e+06
5'-Methylthioadenosine	702994	610116	510540	275352	382559	398098	246048	281821	336140	741568	670016	663038	242588	279010	276901	840253	827596	779180	236625	328712	299090	389752	426679	382556	420755	429204	402080	231454	292933	244808	408231	394996	330897	276677	291769	233051	633657	667207	704558	855002	810022	600643	301725	295754	214098	354635	351999	307357	452298
dimethylglycine	3.59581e+06	3.37371e+06	3.29329e+06	4.61692e+06	4.6018e+06	5.19891e+06	4.43798e+06	4.87325e+06	4.89519e+06	3.05021e+06	2.90098e+06	3.01719e+06	5.03983e+06	5.10692e+06	5.16279e+06	4.58837e+06	4.70955e+06	4.63932e+06	4.47417e+06	4.33627e+06	4.57016e+06	3.53697e+06	3.85678e+06	3.99956e+06	4.07927e+06	4.15355e+06	4.68651e+06	5.45444e+06	5.73909e+06	5.64944e+06	5.22272e+06	5.34054e+06	5.11538e+06	4.81962e+06	4.39974e+06	5.22363e+06	4.39959e+06	4.04004e+06	4.38217e+06	5.64835e+06	5.67473e+06	6.15921e+06	5.31738e+06	4.99075e+06	4.97291e+06	2.76586e+06	2.64421e+06	2.81278e+06	3.07472e+06
4-Hydroxybenzoic acid_neg	1.02379e+06	879600	377941	5.39275e+06	5.68336e+06	4.06266e+06	5.13902e+06	5.0287e+06	3.87384e+06	1.39133e+06	623769	410319	9.93856e+07	9.10841e+07	7.51023e+07	1.33771e+06	620087	611749	8.66405e+06	5.34858e+06	3.96127e+06	848987	700457	447463	1.44904e+06	1.16693e+06	570741	6.12722e+07	5.30899e+07	4.29768e+07	5.29357e+06	3.20667e+06	2.35675e+06	2.02071e+06	2.01021e+06	1.21118e+06	2.41283e+06	2.03429e+06	1.53549e+06	1.19504e+06	658298	446860	1.83089e+06	920118	774311	1.21211e+07	8.16793e+06	7.67937e+06	2.0289e+06
Acetyllysine	2.20699e+06	2.10409e+06	2.05899e+06	2.53282e+06	2.29258e+06	2.55165e+06	2.07127e+06	1.85994e+06	1.90629e+06	2.95574e+06	2.92132e+06	2.88022e+06	2.43641e+06	2.07801e+06	2.2901e+06	2.95191e+06	2.73898e+06	2.6764e+06	1.3453e+06	1.38363e+06	1.2864e+06	1.93035e+06	2.00393e+06	2.03007e+06	1.67209e+06	1.41251e+06	1.5525e+06	2.01557e+06	1.959e+06	1.9683e+06	2.09243e+06	2.22338e+06	1.83958e+06	1.36221e+06	1.27988e+06	1.34589e+06	2.5395e+06	2.62016e+06	2.5152e+06	3.41968e+06	3.45893e+06	3.34069e+06	1.9787e+06	1.97556e+06	1.92927e+06	2.70317e+06	2.7525e+06	2.42041e+06	2.30416e+06
taurine_neg	469439	486777	437581	1.09684e+06	1.21007e+06	1.12995e+06	821718	849760	761430	2.13368e+06	2.0845e+06	2.43266e+06	1.27834e+06	1.29468e+06	1.27301e+06	1.00187e+06	779687	750618	1.2415e+06	1.3254e+06	1.28794e+06	1.16073e+06	1.02517e+06	1.10337e+06	1.36606e+06	1.14101e+06	1.29819e+06	1.03918e+06	960976	909398	1.27937e+06	1.42739e+06	1.31323e+06	1.02628e+06	885413	1.00263e+06	1.13132e+06	981194	1.04143e+06	2.02449e+06	1.8042e+06	1.96272e+06	1.61829e+06	1.57403e+06	1.43548e+06	707981	631404	692282	1.91618e+06
citric/Isocitric acid (2)_neg	326974	279697	289783	959025	906542	888333	510608	544563	595149	861238	974728	777303	410511	481537	440354	60475.7	55741.8	58108.7	1.46162e+06	1.77431e+06	1.7109e+06	168397	178697	162144	701397	714454	811645	86166.4	118378	112964	304096	238196	235980	114444	116088	103387	70305.9	138711	154692	612929	542126	525082	341028	283814	283134	1.24617e+06	1.22573e+06	1.3294e+06	207831
IMP_neg	12451.9	11784.2	13119.7	3958.86	9417.34	12087.8	6959.06	16582.3	13453.1	6024.24	6509.3	10364.1	17131.8	17796.9	16955	15489.3	9335.52	6422.63	13862.8	5389.31	10624.5	9909.82	9423.16	9947.45	3590	13087.8	4859.73	15348.5	5773.84	11632.5	6801.63	3845.13	8620.3	10400	7927.41	10844.6	4628.23	13840.8	19766.4	10455	5400.62	7927.79	12580.2	9632.08	8622.33	6244.73	6080.24	5875.86	14328.4
Indole-3-carboxylic acid_neg	186028	190286	178001	245413	226655	192253	170959	194533	144700	182678	213035	132539	210838	213765	154108	160337	223869	180231	228501	171850	186059	197052	176056	146647	222247	170033	191558	272845	232306	201580	187014	192935	131192	229030	201136	168767	263163	209467	142462	209631	148643	147283	246751	202602	200230	209817	186156	177656	156664
Fumaric + maleic acid_neg	108547	114012	127213	258048	265841	291504	60317	51601.3	65680.5	83848.7	63952.9	137356	74438.1	79104.3	82269.2	71139.7	56176.3	55890.6	27096.7	54400.6	55685.5	105526	78417.3	59977.5	104858	99642.6	138312	34030.2	26560.1	28862.3	42726.1	61390.3	37751.1	48229.4	26848.6	68245.2	84476	103248	67576.9	86601.9	81388.9	111526	55281.3	50147.6	40233.7	486953	417648	334955	44808.6
L-Tyrosine	6.01765e+06	5.75742e+06	5.6518e+06	6.27266e+06	5.18061e+06	5.14172e+06	6.95071e+06	6.22696e+06	6.64311e+06	6.23068e+06	6.12237e+06	5.12097e+06	7.27792e+06	7.64249e+06	7.99489e+06	7.67851e+06	7.71691e+06	6.90337e+06	4.52538e+06	4.44128e+06	4.03073e+06	7.15531e+06	7.49803e+06	5.67185e+06	6.73702e+06	6.28405e+06	5.95765e+06	3.47111e+06	3.34361e+06	3.96728e+06	5.91068e+06	5.40467e+06	4.77947e+06	6.66508e+06	6.47372e+06	6.56078e+06	7.49889e+06	7.66979e+06	8.02003e+06	8.00561e+06	7.48594e+06	7.43555e+06	4.3436e+06	4.76012e+06	4.30153e+06	4.72961e+06	4.29303e+06	4.39752e+06	6.72017e+06
putrescine	143253	166890	156392	140516	176188	150544	68556.6	81885.1	89152.1	40831.6	160633	88667	167902	162729	135544	110583	127708	39526.8	57449.7	69864.6	16804.3	158090	151710	59114.2	132316	183517	154008	16904.2	86059	112780	87779.9	167233	63131	23396.8	136824	147034	119776	99514.7	79300.6	163206	192202	77047.3	32760.8	88416.7	62384.9	96860.4	108529	166972	161124
Aminoadipic acid	125318	134682	87309.5	159313	158376	157487	133654	69162.2	93917.2	82901.2	129210	82153.1	126974	131094	117655	165342	134086	129736	108389	141473	87442.4	106673	108723	84842.3	140495	116042	80531.6	152255	145929	115315	148110	133928	93817.6	136174	165879	113260	107235	126587	128837	111740	127999	100389	142677	129279	91127.9	127639	111684	128255	102930
p-coumaric acid	5.25363e+06	5.67165e+06	6.05279e+06	5.5559e+06	4.61306e+06	4.69372e+06	5.9946e+06	5.44327e+06	6.11514e+06	5.41534e+06	5.25209e+06	4.95418e+06	6.56475e+06	5.91467e+06	7.16546e+06	6.89409e+06	6.22495e+06	5.98266e+06	4.26469e+06	3.93146e+06	4.02021e+06	6.80806e+06	7.11337e+06	6.43845e+06	5.96591e+06	5.78876e+06	6.25858e+06	2.90241e+06	2.98575e+06	3.05879e+06	4.72189e+06	4.83502e+06	4.48906e+06	6.34315e+06	5.29791e+06	6.02846e+06	7.54874e+06	7.28767e+06	7.22299e+06	6.85234e+06	6.74045e+06	6.7278e+06	4.34878e+06	3.71322e+06	4.4976e+06	4.06237e+06	4.35044e+06	3.95014e+06	5.88965e+06
adenine	2.53499e+06	2.63317e+06	2.31262e+06	2.33046e+06	2.11911e+06	2.18e+06	2.80697e+06	2.66206e+06	2.82128e+06	2.40535e+06	2.40152e+06	2.31566e+06	3.06903e+06	2.8203e+06	2.99882e+06	3.20531e+06	3.02547e+06	2.74887e+06	1.71057e+06	1.69594e+06	1.49841e+06	2.82477e+06	2.92189e+06	2.62032e+06	2.54921e+06	2.78816e+06	2.63962e+06	1.50103e+06	1.41491e+06	1.50663e+06	2.17099e+06	2.26603e+06	2.06548e+06	3.01e+06	2.72811e+06	2.74234e+06	3.43468e+06	3.17159e+06	3.32493e+06	3.34796e+06	3.09925e+06	3.18343e+06	1.82772e+06	1.7919e+06	1.55657e+06	1.71523e+06	2.17696e+06	1.63337e+06	2.49085e+06
Alpha-ketoisovaleric acid_neg	137824	89145.8	126844	318386	330194	335913	46053.8	57951.6	76004.9	76888.9	90928.8	110668	82704.3	70803.6	72302.8	52988.2	61227.1	80844.6	55587.7	54509.8	39724.1	85804.9	107446	64956	76643.8	138330	139882	29423.1	52260.7	29922	58593.8	47788.4	70471.2	40368.5	78446.6	52384.1	82819	94270.6	109582	127809	107060	169711	51537.9	57784	84079	607440	606862	482291	48691.4
Methylcysteine	5.90113e+06	6.01036e+06	5.33485e+06	5.6135e+06	5.54247e+06	5.45396e+06	7.63758e+06	6.91791e+06	6.80503e+06	5.92004e+06	6.2766e+06	5.38157e+06	7.70258e+06	6.86504e+06	7.7843e+06	7.47432e+06	7.31159e+06	7.2361e+06	4.73503e+06	4.46595e+06	4.16748e+06	8.01435e+06	7.72505e+06	6.98716e+06	6.39849e+06	5.98839e+06	7.04465e+06	3.56928e+06	3.38064e+06	3.58029e+06	5.53457e+06	5.7208e+06	5.24499e+06	6.51735e+06	6.69791e+06	6.60186e+06	8.43771e+06	8.05752e+06	8.52459e+06	7.79563e+06	7.54103e+06	7.90291e+06	4.40485e+06	4.25417e+06	4.26962e+06	4.27718e+06	4.60616e+06	4.45954e+06	7.13204e+06
3-hydroxybutyric acid_neg	105535	79737.8	73533.2	65151.8	49841.2	24424.5	32329.1	25586.5	31265.4	359454	293187	239476	71692.2	73069.3	40272.3	11585.2	3287.02	7436.09	19008.9	16226.8	4539.41	13892.3	6563.18	10146.8	91635.2	71800.2	42570.2	38628.5	34369.3	17099	52428.6	36913.3	31785	7204.43	7349.83	7277.13	4917.14	2964.95	5694.28	72506.7	67224.6	51184.1	113380	82015.2	76713.9	133743	130309	104443	2888.06
2-Oxo-3-methyl-butyrate	808027	787123	908985	877101	414480	853160	747081	261340	891183	64746.9	756604	989980	642129	406678	508299	688648	831977	760313	483496	479412	849922	654552	452418	1.09288e+06	254411	793715	331556	920479	751660	846479	312156	710432	654596	836262	387928	903124	292436	584021	536136	654507	526112	411659	14724.5	418963	845910	659649	653862	757218	628398
Asymm + symm dimethylarginine	1.05446e+06	1.02594e+06	1.33319e+06	811423	703847	860905	955439	903265	981535	1.68362e+06	1.52497e+06	1.88206e+06	799190	656672	801571	1.74428e+06	1.63707e+06	1.53799e+06	504174	468322	515746	819385	915165	1.01396e+06	969333	787135	924835	830240	759471	726739	610049	525549	481626	759088	754934	815148	780800	894098	949181	1.8302e+06	1.87318e+06	1.99745e+06	791859	794042	950366	597064	786948	867461	934213
L-Leucine + L-isoleucine	2.29372e+08	2.19089e+08	2.01167e+08	2.46372e+08	2.31396e+08	2.28684e+08	3.19548e+08	2.89698e+08	2.87119e+08	1.88791e+08	1.87347e+08	1.46277e+08	2.9238e+08	2.61278e+08	2.80265e+08	2.51751e+08	2.27459e+08	2.19523e+08	1.8746e+08	1.87494e+08	1.57815e+08	2.92999e+08	2.69415e+08	2.26077e+08	2.30235e+08	2.17606e+08	1.73354e+08	1.85912e+08	1.78997e+08	1.69568e+08	2.68687e+08	2.40341e+08	2.27635e+08	3.0298e+08	2.79172e+08	2.64396e+08	2.14919e+08	1.91185e+08	1.90586e+08	2.14269e+08	1.99676e+08	1.81726e+08	2.47532e+08	2.24439e+08	2.06018e+08	1.93961e+08	1.94778e+08	1.72371e+08	2.70908e+08
uridine_neg	47308	37218.4	33346.8	60486.9	51178.6	44202.1	41871.6	43422.6	47305.3	62038.5	41100.6	38771	54282.6	42650.5	32567.6	74448.1	78321.9	64872	62810.7	54277.8	32060.3	45937.7	48073.2	57540.8	33773.8	38607.6	27138.1	39551.7	39544.6	36356.2	53989.3	44194.2	47175.7	31178.2	38767.4	20644.5	51179.1	62816.2	42648	82199.8	45756.1	58156.7	48856.7	40323.8	49632.3	32332.8	27137.8	23242.2	58332.4
2-hydroxybutanoic acid_neg	94611	77545.4	68948.8	71341.6	74887	86857.7	20154.3	24337.1	15533.8	103132	83099.4	52260	44976.7	36425.7	50149.1	41189	40328.1	16889	37523.6	27709.5	27550.7	33307.2	20160.9	17823.4	52927.8	49600.9	37737.3	13490.5	24004.8	21172	21778.4	34119.8	28687.3	36709.9	36172.8	41097.8	33342.5	32899.1	34252.4	59359.1	52891	48462.1	49898.9	55256.6	18493.8	52645.8	52681.9	57144.9	10281.8
asparagine	165564	168902	164229	110493	140729	125375	322643	309111	325480	141213	183674	155612	305589	264213	301434	190690	247142	228294	207185	218981	185202	418402	341310	229848	239003	188002	198848	231943	228189	219938	190176	208461	190062	401042	351077	387887	242565	229243	206032	289475	313265	227465	298446	262975	286263	118690	79631.9	75137.5	456811
Glyceric acid_neg	5408.81	8013.34	7613.26	12300.8	17064.5	8716.29	14869.1	13501.4	17041.2	12357.6	14233.3	5804.9	20838.3	22410.6	13183.7	21981.6	14730.9	17061.9	17056.7	20401.4	6275.63	16926.6	7679.34	9227.47	39588.6	18611.3	17825.8	27858.7	17996.8	13478.9	25863.4	29156	16870.9	16467.6	22691.3	18138.1	9962.6	17834.4	12408.8	10472.1	6979.2	14730.9	19259.6	17488.5	12795.9	12403.2	11482.9	12404.3	16230.5
dUMP_neg	28295.4	17938.8	19934.6	40806.7	31578.6	19867	55046.4	29629.5	34683.9	13198.2	15841.3	12451.4	31198.3	36870.1	20646.5	30287.3	40575.8	23949.3	43353.8	47889.2	54666.6	40583.5	44322.1	27622.1	35023.4	19782.5	26634.3	52277.2	41819.4	18679.2	48526.1	37919.3	31498.2	23223.3	10952.2	10858	57537.1	35110.4	54289.6	20380.1	28878.6	19563.3	87904.5	37479.5	43309.4	47429.1	27745.2	35972.6	13966.3
ornithine	94719.9	78455.5	62191	92208.1	106736	94474.7	143220	230420	155230	116138	82584.6	104897	145884	117931	198045	171690	81077.6	94918.7	292059	242542	306003	155101	115961	157025	155219	109871	132126	428091	397060	353341	217098	208505	207793	197047	133756	150026	107129	79037.2	111366	121972	198103	127018	311331	221483	231939	125719	134283	205462	141299
7-methylguanosine	378886	349793	461361	422817	468944	514790	369217	376355	435686	672582	549158	583758	226726	239749	174711	752861	720700	732348	304264	399750	294818	216150	285275	197100	371996	406754	287928	211039	210560	250779	446272	351972	343773	183905	204135	180254	273237	314573	346665	594591	572921	440871	437727	419352	283302	604547	589989	563844	237913
Uric acid_neg	3.01746e+07	2.74392e+07	2.54188e+07	2.77729e+07	2.80092e+07	2.7949e+07	2.43191e+07	2.3602e+07	2.39259e+07	3.37293e+07	3.15689e+07	3.69509e+07	3.07427e+07	2.56192e+07	2.94993e+07	4.16805e+07	4.31294e+07	3.47971e+07	1.3935e+07	1.62004e+07	1.3956e+07	3.46831e+07	3.29414e+07	3.36851e+07	2.94421e+06	2.91004e+06	2.80682e+06	26872.4	27596.2	28077.6	3.12229e+07	2.88425e+07	2.99965e+07	1.03184e+07	9.18679e+06	8.577e+06	2.77094e+07	2.52844e+07	2.40212e+07	6.21188e+07	5.62023e+07	4.93002e+07	6.07545e+06	5.99014e+06	5.75088e+06	5.75417e+06	5.9112e+06	6.06472e+06	3.88488e+07
Indoleacrylic acid_neg	174928	137422	133058	160261	129136	127278	141214	161971	107079	9.50399e+06	7.35149e+06	5.9431e+06	123536	114295	81296.8	242210	121528	127633	15507.1	12133.2	12163.5	127821	28901.6	30108.1	19004.6	21931.5	99321.8	121082	62520.4	3958.99	146458	15255.6	101271	120519	10412.3	65465.8	165176	125966	110000	131043	109649	92464.3	122746	136647	112693	2796.82	4180.6	15714.5	154063
L-Methionine	4.09251e+06	4.0191e+06	3.71399e+06	1.55454e+06	1.4192e+06	1.36285e+06	2.34758e+06	1.70704e+06	1.52473e+06	3.10007e+06	2.70168e+06	2.19058e+06	3.75865e+06	3.30669e+06	3.36321e+06	6.13123e+06	5.52899e+06	5.07992e+06	2.59239e+06	2.44473e+06	2.15516e+06	2.6614e+06	2.74616e+06	2.07517e+06	2.56719e+06	2.06636e+06	1.96414e+06	1.50411e+06	1.19391e+06	1.05267e+06	2.11928e+06	1.59426e+06	1.4975e+06	3.10378e+06	2.39194e+06	2.35039e+06	3.8559e+06	3.40455e+06	3.5117e+06	4.00468e+06	3.93087e+06	4.004e+06	3.65418e+06	3.04938e+06	2.78029e+06	2.73239e+06	2.48234e+06	2.4057e+06	4.55283e+06
Citraconic acid_neg	407032	252515	152039	477554	195924	297800	559019	301157	301012	239537	310273	83248.1	580038	258761	355051	537778	314154	135604	378459	307018	92697	411642	234484	111064	427546	190561	309054	532538	226780	304356	352649	186236	74787.2	487597	241639	148411	627308	266105	342690	305185	223783	264484	450514	319644	75766.7	300175	224844	159626	378652
trimethylamine oxide	236860	242528	241386	194749	321167	436468	912080	1.0762e+06	1.4121e+06	455043	381719	310096	1.30371e+06	1.07649e+06	1.70183e+06	2.16445e+06	2.39563e+06	2.72348e+06	217196	248467	307975	1.57033e+06	2.01307e+06	1.7721e+06	302232	403125	524076	157797	192974	401812	1.11401e+06	1.5516e+06	1.3336e+06	91989.5	111685	132255	94660.5	93991.7	95329.2	1.74777e+06	1.84033e+06	2.01616e+06	203078	381717	296721	371111	302881	300088	3.32259e+06
N-Acetyl-L-alanine_neg	90440.4	83263.1	93254.7	107465	114316	122338	58683.4	64728.2	47000.6	105087	92298.8	84048.9	53705	47843.1	58511.5	137351	139196	119236	44347.1	43134	53279.6	49225.2	62371.2	46233.2	62320.3	43600.4	49021.8	31093.9	24698.7	26650.5	68170.1	46248.5	63596.3	40056.6	42571.3	31912.9	72832.3	57018	51114.5	136881	134648	134023	52650.6	53690.3	47001.9	49736.9	44230.5	57080.6	62777.1
Allantoic acid_neg	38425.9	40248.9	23391.7	50448.4	54216.5	84947.8	62587.1	51436.6	55477.5	58610.5	65331	57618.2	73325.3	87416.4	74104.8	73112.2	79605	63764.4	50362.1	46965.8	37692.4	51242.9	56057.3	55554.9	63568	61853.1	67255.9	84953.8	75332.1	54395.2	73837.3	74662.1	91757	31123.9	42900.1	36403.1	61162.4	41287	35385.3	35980.7	52782.4	28351.8	38174.1	48849.8	40272.8	77790.7	67675.7	74953.4	47914.8
pantothenic acid	94402.2	111898	121288	150600	192009	218655	107699	141004	109263	101826	133860	118445	55588.4	88837.4	96446.7	229931	216346	196400	93803.5	77481	89158.9	109737	129346	139218	115750	108274	111878	37891.4	48457.3	40114.6	140465	129925	134160	88303.1	127362	101883	99610.7	120253	140827	143612	152387	176674	110862	104128	131456	152615	151097	134567	64219.5
Tetradecanedioic acid_neg	1.24603e+06	899037	811950	1.11907e+06	910070	747294	1.37687e+06	1.36584e+06	1.03483e+06	952360	874866	607457	1.31112e+06	1.18387e+06	991464	2.62481e+06	2.35528e+06	1.32735e+06	1.59778e+06	1.15436e+06	895245	2.24184e+06	1.95654e+06	1.57871e+06	1.19845e+06	948395	778923	1.09142e+06	1.00019e+06	881027	1.12293e+06	835859	655152	1.46507e+06	1.10401e+06	1.08492e+06	606628	549698	453722	834343	716959	499576	1.19833e+06	953891	798286	920229	655113	582983	1.65784e+06
Phenyllactic acid (2)_neg	152655	146681	130851	132751	109004	103109	91501.2	74909.6	82262.4	148811	127344	102758	42988.7	35546.3	30835.9	111270	87350.9	79319.5	46414	58118.9	33448.5	49409	41094.2	27109.4	112379	104700	90102.1	42193.5	31600.5	33000	78725.2	93706.4	58690.8	55403.3	66893.9	44869.3	99402.4	62567.6	70599.5	79138.6	76188.4	56242.8	136224	91557.1	87999	300179	261420	233377	111722
L-Glutamine (?)	384831	382463	322423	309941	241109	310990	106618	99465.6	123377	348121	293511	298073	617583	636655	585783	545242	538373	544377	483165	395369	413003	75178.8	73065.6	71060.7	371057	334883	294687	417766	440829	456257	528625	478291	395201	264421	268834	263366	524316	550983	566995	461811	478596	431054	208361	216841	181842	294858	346367	280085	560591
hippuric acid_neg	347724	337072	230766	741329	674964	645521	3.36864e+06	2.6856e+06	2.60133e+06	673384	744992	521222	431956	385900	338813	1.64739e+06	1.35478e+06	1.41395e+06	1.66916e+06	1.67361e+06	1.25224e+06	2.09691e+06	1.95246e+06	1.66621e+06	3.92441e+06	3.77688e+06	3.29242e+06	332373	261316	265988	1.02801e+06	1.02187e+06	759214	651462	614844	641526	11712.1	14878	13295	698024	666842	575427	173832	139082	145329	166225	171793	125525	1.40239e+06
hippuric acid	1.17878e+06	1.2703e+06	995602	2.13083e+06	2.42533e+06	2.17427e+06	8.66503e+06	8.87167e+06	8.70906e+06	2.49072e+06	2.25898e+06	1.87809e+06	1.31522e+06	1.46452e+06	1.24741e+06	2.5149e+06	2.44333e+06	2.42798e+06	6.08066e+06	5.91774e+06	4.74697e+06	6.92956e+06	6.51574e+06	6.02434e+06	1.37207e+07	1.29735e+07	1.13392e+07	1.00668e+06	1.12254e+06	1.11764e+06	4.11381e+06	4.05519e+06	3.17864e+06	2.1222e+06	2.25566e+06	2.17783e+06	164034	171446	154730	2.55984e+06	2.09867e+06	1.76576e+06	569318	664728	477104	550886	695065	675903	4.5089e+06
gluconic acid_neg	201484	214296	224320	1.35734e+06	1.49493e+06	1.51944e+06	306378	310224	314415	249973	215111	210918	166780	178328	176621	277386	222474	135225	302830	312547	316351	194644	170506	172237	235611	259485	256165	191272	211658	197209	466595	440853	404093	270370	219302	215061	257964	247417	229470	360053	352497	330382	186986	178046	157676	308179	332908	287383	163073
Pantothenic acid_neg	99021	95262.2	83721	196013	219789	200967	115142	86693.3	134591	113931	104449	78672.3	97883.7	86276.8	82654.3	231872	200197	189667	86293.5	90283.3	77874.8	126822	107726	108259	111949	110754	155901	29594.3	42238.5	42392.7	115538	110584	116904	105538	103063	91532.5	123133	138436	91688.5	166832	166699	143230	125999	131383	124007	107021	132335	92958.9	45594.9
carnitine	5.748e+07	6.12269e+07	6.04232e+07	8.10083e+07	8.09424e+07	7.43542e+07	5.69198e+07	5.42961e+07	5.47914e+07	6.95385e+07	6.78115e+07	7.22052e+07	4.83708e+07	3.85963e+07	4.96604e+07	8.90313e+07	7.33799e+07	8.65521e+07	4.05834e+07	4.00812e+07	4.13181e+07	5.70709e+07	6.37065e+07	7.64454e+07	3.4288e+07	3.45035e+07	3.71446e+07	5.6457e+07	5.55621e+07	5.8227e+07	5.31522e+07	5.45901e+07	5.47747e+07	5.66528e+07	5.5924e+07	5.63565e+07	8.45633e+07	7.57849e+07	6.9475e+07	1.11509e+08	1.0843e+08	1.05376e+08	3.73483e+07	3.69349e+07	3.63555e+07	6.06125e+07	6.6923e+07	6.58766e+07	5.1806e+07
Ureidosuccinic acid_neg	72708.9	46951.8	40700	52635.4	75093.2	58264.8	60492.2	78560.2	75512.2	66136.5	69910.2	79661.3	84592.1	91765.8	71966.3	86235	85773.3	71576.3	48744.6	46621.4	62597.2	48509.7	57834.4	58019.9	76769	58974.5	66936	61681.2	89652.5	72928.5	104815	94789.5	99935.4	50483.4	32549	48129.6	47985.4	57049.7	45124.1	50012	55516.6	56310.9	41300.5	38875.9	38201	74156.9	90694	83477.4	53392.9
citrulline	1.05765e+06	933807	1.01686e+06	643559	631863	595129	3.15068e+06	3.31068e+06	3.31542e+06	956917	811373	767262	3.56182e+06	3.53317e+06	3.19844e+06	2.15717e+06	2.01187e+06	2.08068e+06	833149	735968	666835	2.394e+06	2.08313e+06	2.1014e+06	2.49345e+06	2.02997e+06	2.0093e+06	2.45671e+06	2.54767e+06	2.83028e+06	2.42465e+06	2.05836e+06	1.9173e+06	1.25808e+06	1.10516e+06	959309	1.9217e+06	1.73202e+06	1.62867e+06	812320	761891	628263	1.3395e+06	1.20841e+06	1.13617e+06	1.53104e+06	1.55567e+06	1.30137e+06	2.94721e+06
glucose_neg	98877.8	92291.8	61933	206885	175002	165193	98487.9	96943.6	103886	103972	87675.2	71346.4	62810.6	54915.3	40978.8	92116.3	64122.6	73472.2	75221.6	61266.6	64351	59661.3	67407.2	40476.3	64367.5	61263.2	40574.5	111422	122179	75990	103457	62059.5	56540.9	138376	117883	94548.3	75837.3	55945.9	59470.5	96365.4	78906	84522.7	115453	77629.2	76783.9	71351.1	57387.7	44579.4	50771.4
L-Tryptophan	3.83559e+07	3.85923e+07	3.56867e+07	3.18045e+07	3.97226e+07	3.93687e+07	4.64341e+07	5.52877e+07	5.67744e+07	3.02814e+07	2.76858e+07	2.3351e+07	6.00721e+07	6.58668e+07	6.66314e+07	7.45701e+07	6.78596e+07	7.31068e+07	3.69088e+07	3.04875e+07	2.76508e+07	6.58829e+07	7.33549e+07	5.53158e+07	5.19947e+07	4.26814e+07	3.60683e+07	1.28442e+07	1.46479e+07	1.53069e+07	4.08097e+07	3.9513e+07	3.21057e+07	5.72551e+07	5.65966e+07	6.02788e+07	6.59035e+07	7.20527e+07	4.4691e+07	2.80638e+07	2.93744e+07	2.18503e+07	3.00405e+07	2.97499e+07	2.81858e+07	3.12387e+07	2.78866e+07	2.69462e+07	7.8387e+07
Acetylcarnitine	4.99574e+07	4.80431e+07	4.35784e+07	1.58243e+08	1.60279e+08	1.47559e+08	7.10847e+07	6.03382e+07	6.55262e+07	1.60327e+08	1.36708e+08	1.40055e+08	8.23518e+07	7.82575e+07	7.61688e+07	3.62912e+07	4.79055e+07	4.21775e+07	2.00592e+07	1.64349e+07	1.47126e+07	5.2661e+07	5.10133e+07	4.38287e+07	5.88919e+07	5.16652e+07	4.70461e+07	4.19131e+07	3.62936e+07	3.62255e+07	2.8312e+07	2.31447e+07	2.02595e+07	2.98408e+07	3.15368e+07	2.94395e+07	2.86107e+07	2.89167e+07	2.53329e+07	7.33614e+07	7.16362e+07	5.1068e+07	1.77893e+07	1.62891e+07	1.45413e+07	1.08931e+08	1.04796e+08	8.68471e+07	7.46888e+07
Alpha-N-Phenylacetyl-L-glutamine	427903	484804	420809	2.25187e+06	2.42563e+06	2.29572e+06	421250	477672	459868	1.48139e+06	1.51102e+06	1.19484e+06	308460	299297	274818	1.8642e+06	1.8237e+06	1.78027e+06	1.17245e+06	1.2437e+06	953723	428691	381192	368487	761003	773313	699649	305782	328044	336858	1.358e+06	1.29298e+06	969980	274768	287890	249844	334633	344186	300833	2.36906e+06	2.2206e+06	1.81571e+06	327817	325157	278752	526015	497404	445036	129990
L-Histidine	6.27e+06	5.5102e+06	7.99911e+06	7.78515e+06	7.50367e+06	7.70798e+06	1.35378e+07	1.65774e+07	1.41104e+07	6.10081e+06	5.96383e+06	8.55603e+06	1.04979e+07	1.00484e+07	1.02894e+07	7.15807e+06	4.89393e+06	5.49933e+06	1.62921e+07	1.42383e+07	1.30262e+07	9.042e+06	8.99891e+06	1.16141e+07	7.45559e+06	7.48787e+06	8.14595e+06	7.21136e+06	7.77448e+06	8.55037e+06	9.16346e+06	9.3045e+06	1.15826e+07	1.22899e+07	1.31487e+07	1.5789e+07	5.95065e+06	5.84895e+06	5.66495e+06	5.71882e+06	6.62961e+06	7.35945e+06	9.05678e+06	8.48337e+06	9.46568e+06	4.31621e+06	4.08441e+06	5.76719e+06	1.17407e+07
d-glucose_neg	218728	215191	186919	537264	492276	507435	247431	237585	212061	252062	268862	192343	180185	145543	155195	220995	177447	171406	212174	167520	142114	185224	161491	138333	200810	163559	139960	274476	238223	213848	232376	199200	172125	347143	350027	325509	172172	175062	139611	249622	190796	175177	280457	263946	205708	173375	146112	111025	132663
Hydroxyisocaproic acid_neg	284262	312066	194827	281784	227029	226511	155208	158557	129241	465273	385467	315859	229609	170643	203167	207250	211936	189522	247014	215356	179625	153998	157540	113289	260453	207223	169856	146554	155345	189329	223309	226755	150577	171009	134869	117982	325334	282655	289750	296490	204489	163706	313766	307354	288328	241340	192115	176641	196627
Quinolinic acid	80338	69849.4	62888.7	89908.6	77054.2	67294.8	89606.9	71037.4	62572.8	63401.8	45921.9	50511.9	98625.1	60155.7	80707.2	90317.6	74728.1	78963.5	131905	86702.5	64950.3	145526	98621.7	64934.7	73994.6	50755	46360.1	81333.2	86043.9	60799.3	70785.5	65156.5	48181.1	83800.9	78141.2	68986.1	100739	76637.2	93481.4	91636.1	54755.3	45664.6	96694.3	83122.9	78877.2	122252	106937	68780.4	57634
Kynurenine (1)_neg	75822.4	69791.3	54282.6	118560	108505	96750.4	85222.5	69016.2	90094.4	49311.5	58306.4	37191.5	39539.3	39448.6	40323.8	87972.9	84525.7	78853.1	23955.7	17988.7	14730.9	42642	40216.2	32565.5	67194.6	76769.6	54284.5	56999	42221.3	39544.3	69013.5	61189.5	59714.5	55052.3	45753.9	51176.8	69787.1	83715.9	79022.1	123767	114105	96832.1	140795	93035.4	119841	48072.8	46525.9	44918.9	46615.4
Pyridoxamine	3.24967e+07	3.30074e+07	3.44178e+07	2.30597e+07	2.69262e+07	2.50139e+07	2.38381e+07	2.56678e+07	2.69642e+07	4.06721e+07	4.16672e+07	3.66303e+07	3.13318e+07	3.26042e+07	3.37713e+07	5.09484e+07	5.222e+07	5.21329e+07	1.11751e+07	1.25143e+07	1.10556e+07	3.9413e+07	4.59573e+07	4.00036e+07	3.42799e+06	3.22674e+06	2.73681e+06	19372.7	22308.2	31098.2	3.14369e+07	3.22463e+07	2.95759e+07	8.12999e+06	9.09899e+06	8.85327e+06	2.7761e+07	2.83581e+07	2.5612e+07	7.55488e+07	7.53181e+07	7.51962e+07	5.36593e+06	5.86931e+06	5.6738e+06	5.74674e+06	4.9485e+06	4.7875e+06	4.7196e+07
Melatonin	171029	283215	132203	586014	980983	1.12323e+06	205870	248742	210328	227190	385490	306340	135298	259601	322024	252788	282122	538701	121869	135430	130781	325830	365533	362741	116841	146885	86796.1	118590	114520	148354	493021	571601	447415	165364	219717	84442.8	373105	312751	347551	521513	647368	489342	172913	135559	97680.4	400799	263942	428587	303885
Cystine (1)	228859	227249	200604	37317.9	41823.3	40276.2	168425	178930	171746	238851	302125	238691	309997	247505	249158	132299	146075	125637	177035	168687	151615	256405	223993	199581	120718	131810	160569	128091	131962	121259	217479	204492	181053	139970	148140	150637	213594	231253	186339	176883	173676	187920	172563	145074	133549	36001.5	41019.9	66997.8	172287
Homogentisic acid_neg	2.8904e+06	3.38965e+06	2.91423e+06	2.53252e+06	2.85032e+06	2.93685e+06	2.54175e+06	2.4552e+06	2.49539e+06	3.23323e+06	3.3879e+06	4.11251e+06	3.55733e+06	3.04912e+06	3.18786e+06	4.31518e+06	3.6409e+06	3.9205e+06	1.34808e+06	1.30789e+06	1.21511e+06	3.55553e+06	3.79127e+06	3.98908e+06	295259	359273	291600	1.9607e+06	1.9607e+06	1.9607e+06	3.20269e+06	3.64801e+06	3.96735e+06	1.29129e+06	949461	1.03573e+06	2.5444e+06	2.74157e+06	2.67129e+06	7.01119e+06	5.75042e+06	5.88485e+06	587367	589205	687662	785578	653619	600237	4.12392e+06
acetyl-CoA (2)	50957.7	22172.4	26448.4	48852.8	24804.9	18578	85248.8	77022.7	95501.7	27104.4	24330	25241.1	44317.6	25835.1	29446.2	31709.9	13750.5	15505.7	20198.1	22000.4	12831.2	46942.2	47757	25891.6	21630.8	48712.4	20628.3	52716.4	40759.9	25885.5	34296.5	27336.3	14147.9	48756.7	42050.8	32320.6	26913.4	19290.8	37783.3	23220.1	9119.54	20921.3	32168.4	18539.4	18477.3	25253.5	22665.9	58049.7	40239.9
caffeine	3.07756e+06	2.97899e+06	2.68877e+06	8.10432e+06	1.00612e+07	9.56984e+06	5.30406e+06	5.9602e+06	6.09963e+06	488347	375515	385669	2.68815e+07	3.08012e+07	2.91567e+07	1.588e+06	1.59973e+06	1.53572e+06	3.76452e+07	3.60287e+07	3.09181e+07	3.25384e+06	3.0698e+06	2.57511e+06	4.8576e+07	4.41965e+07	4.05831e+07	1.0166e+06	1.11257e+06	1.10536e+06	2.15122e+06	2.23881e+06	1.68099e+06	3.54309e+06	3.60095e+06	3.54677e+06	3.48633e+06	4.04713e+06	3.99636e+06	2.29318e+06	2.38045e+06	1.70749e+06	6.33506e+07	6.26656e+07	5.96034e+07	1.29896e+07	1.2804e+07	1.10091e+07	355563
L-Kynurenine (2)	1.65148e+06	1.57016e+06	1.68168e+06	2.20005e+06	2.34275e+06	2.1166e+06	1.74801e+06	1.82877e+06	1.98e+06	1.395e+06	1.22382e+06	1.25976e+06	825260	788243	824713	1.87842e+06	1.76699e+06	1.73337e+06	772862	692997	697212	1.11442e+06	1.03961e+06	1.00523e+06	1.61729e+06	1.66614e+06	1.38512e+06	861557	1.00978e+06	848947	1.51691e+06	1.04238e+06	1.2202e+06	1.29375e+06	1.30218e+06	1.39049e+06	1.52658e+06	1.55806e+06	1.65158e+06	2.50839e+06	2.70932e+06	2.39652e+06	2.89908e+06	2.35256e+06	2.41481e+06	1.73071e+06	1.55455e+06	1.2666e+06	1.36822e+06
xanthine	2.28389e+07	2.39537e+07	2.39532e+07	1.42566e+07	9.27758e+06	9.55251e+06	1.49792e+07	9.68111e+06	8.71489e+06	8.77201e+06	7.98041e+06	8.22721e+06	9.29603e+06	6.54479e+06	7.96075e+06	2.15133e+07	1.95459e+07	2.2479e+07	4.0747e+06	3.71381e+06	3.43289e+06	2.32556e+07	2.424e+07	2.20718e+07	7.44933e+06	7.72515e+06	7.50006e+06	4.92029e+06	4.4619e+06	4.77811e+06	1.4115e+08	1.36317e+08	1.36358e+08	1.56417e+07	1.44744e+07	1.51568e+07	2.80332e+06	2.92544e+06	2.78823e+06	3.96338e+07	3.91268e+07	4.47406e+07	1.08936e+07	1.07587e+07	8.92553e+06	1.03469e+07	1.00337e+07	8.7619e+06	6.67962e+06
Pyroglutamic acid_neg	19067.6	13775.7	12986.1	27764.3	10703.3	23876.1	15606.8	10075.7	12176.2	16470.5	24036.5	16127.4	25519.2	24599.1	30241.2	24307	18412	26570.7	28678.5	23780.9	32499.7	5411.78	10849.3	7511.82	16028	16278.9	10474.9	20196.6	17373.1	20030.7	26111.6	32304.7	19298.3	29452.6	32227.1	23254.3	14153	20156.1	19828.5	23538.7	11364.7	16976.8	22212.1	19498.9	16214.4	27917	27136.8	18605.5	18599.7
cytidine	20937.7	19455.9	21710.1	98270.7	79070.7	65180.3	19728	20158.2	14648.9	35671.7	23415.5	24798.8	15673.3	8522.54	13265.4	19379.8	18611.4	25557	14673	3288.94	8980.96	10632.3	6575.98	6977.04	21650.4	30894.4	19386.2	6976.75	10076.3	7756.19	29336.1	20619.5	21437.4	23264.3	16732.3	13956	29471.7	19384.3	30179.9	32079.1	33949.6	49451.7	31014	30884.6	23859.6	19332	19792	18946.5	6705.47
2-Aminooctanoic acid (1)	617107	619557	630177	3.51391e+06	3.9e+06	3.71991e+06	2.71211e+06	2.54923e+06	2.69319e+06	2.30081e+06	2.17878e+06	1.86221e+06	2.93443e+06	3.14842e+06	3.00365e+06	4.20665e+06	4.04139e+06	4.38015e+06	1.64314e+06	1.59401e+06	1.50613e+06	1.95796e+06	2.23369e+06	1.90635e+06	2.0789e+06	2.04868e+06	1.8543e+06	1.24733e+06	1.20878e+06	1.27521e+06	1.80125e+06	1.60108e+06	1.50025e+06	4.20245e+06	4.33829e+06	4.39344e+06	1.88573e+06	2.11634e+06	1.99424e+06	2.64707e+06	2.53865e+06	2.512e+06	447248	385944	454248	1.06036e+06	1.16702e+06	1.24304e+06	2.08627e+06
L-Valine	2.67559e+06	2.55272e+06	2.54849e+06	2.74256e+06	2.83966e+06	2.67137e+06	3.0761e+06	3.14383e+06	3.02113e+06	2.17895e+06	2.07482e+06	1.83538e+06	2.9818e+06	2.6052e+06	2.87306e+06	2.21107e+06	2.1405e+06	2.16817e+06	2.90611e+06	2.75612e+06	2.42589e+06	3.00208e+06	3.07084e+06	2.62869e+06	2.75554e+06	2.515e+06	2.24283e+06	2.6508e+06	2.81093e+06	2.70437e+06	3.43083e+06	3.29748e+06	2.70802e+06	3.31716e+06	3.22451e+06	2.9956e+06	2.74531e+06	2.70988e+06	2.50765e+06	2.11351e+06	2.05208e+06	1.93598e+06	3.29233e+06	2.64814e+06	2.87279e+06	2.80408e+06	2.45767e+06	2.53975e+06	2.8896e+06
serotonin	71926.6	69617.1	72180.7	45138.9	44221.6	55758.2	124003	136643	153258	54983.3	48102.4	43829	117033	147973	136111	105284	135234	107767	75665.1	70938.9	58358.4	140319	174867	171800	87917.1	81057.4	115128	83311.7	91089.2	89683.5	101585	99914.1	100539	98726.5	94830.7	97858	90741.9	100143	107751	84299	109787	89766.4	65997.8	65994.6	99151.7	49010.2	36368.9	45455.7	165080
Guanidinoacetic acid	738211	621274	598551	197442	280114	222997	201931	195601	220737	570868	549470	477591	628670	575609	530115	255430	194249	163102	104868	81338.3	96698.3	168095	179650	140276	303690	236366	178532	200656	182569	157017	335489	365561	242522	118422	112996	121630	362370	231538	275387	707248	648455	521417	790541	693467	646403	660620	670446	603268	238197
Lipoamide	1.95103e+07	1.9489e+07	1.67701e+07	1.64489e+07	1.97994e+07	1.96926e+07	2.51208e+07	2.83526e+07	2.97765e+07	1.52144e+07	1.5523e+07	1.18718e+07	3.03362e+07	3.22189e+07	3.04322e+07	3.99812e+07	3.52333e+07	3.48201e+07	2.06744e+07	1.83703e+07	1.38689e+07	3.54682e+07	3.51273e+07	2.86658e+07	2.4873e+07	2.08538e+07	1.85016e+07	7.52089e+06	8.21826e+06	7.33284e+06	2.14371e+07	2.12135e+07	1.73803e+07	2.87306e+07	2.99811e+07	3.25355e+07	3.23783e+07	3.60932e+07	3.43177e+07	1.58667e+07	1.55852e+07	1.16748e+07	1.59532e+07	1.42026e+07	1.43098e+07	1.56602e+07	1.40622e+07	1.27436e+07	4.14956e+07
Methylmalonic acid_neg	42456.2	40401.8	29235	73624.6	67307.9	63018.3	112283	126902	69042.5	47017.8	54784.6	45676.2	57683.7	48465.7	38247.2	99094.6	69593.2	69654.8	47534.3	31550.1	39593.2	109619	110374	101355	83550.1	81195.2	72620.5	74845.4	64773.4	65871.6	38775.7	35205.8	35203.2	66802.5	61838.2	65284	39736.7	48106.6	46901	73076.4	56220.8	58165.4	85767.7	45762.8	48155.3	46178.7	43780.8	21979.6	60554.7
Pyroglutamic acid	163597	144833	123803	148583	169216	154031	78581.7	72005.6	74062.2	33065	36933.2	21975.2	36793.6	48480.8	43363	167895	207108	190005	92656.1	99324.4	91652.2	59384.3	62852.4	41936.2	33427.6	24646.2	37461.8	53598.1	57357.6	43165.7	149775	192105	139610	50944.6	30033.8	66721.5	58959.3	88354.1	81330.9	434860	382025	387990	170958	160626	154458	333535	287799	301746	170316
xanthosine	80694.5	85174.8	93261	236985	268178	207315	80042	84824.7	79082.9	131232	164509	189436	113645	108522	150149	170585	132962	163889	211988	237451	243686	95081.9	106933	125356	125133	97209.2	122169	40512.2	33302	35374.9	3.03374e+06	2.93875e+06	3.15277e+06	57861.6	39638.3	30931.7	17080.1	71403	107561	176067	207961	178913	133231	141484	122438	120416	108762	106228	76513.5
L-Phenylalanine	2.20411e+08	2.10113e+08	2.17591e+08	1.40113e+08	1.63017e+08	1.52962e+08	2.81741e+08	3.17611e+08	3.10134e+08	1.99372e+08	1.97857e+08	1.73138e+08	2.1486e+08	2.13471e+08	2.23357e+08	2.78749e+08	2.66404e+08	2.51973e+08	1.94333e+08	1.77691e+08	1.70597e+08	3.28794e+08	3.23507e+08	2.75176e+08	2.79665e+08	2.62704e+08	2.1811e+08	1.5727e+08	1.67336e+08	1.68289e+08	2.97648e+08	2.76048e+08	2.77635e+08	2.68415e+08	2.66983e+08	2.72223e+08	1.63322e+08	1.65768e+08	1.77198e+08	2.62037e+08	2.59513e+08	2.30295e+08	2.16443e+08	2.06645e+08	1.94708e+08	2.44425e+08	2.31076e+08	2.22024e+08	2.43353e+08
L-Proline	1.90786e+07	1.87781e+07	1.94647e+07	3.89923e+07	3.91889e+07	4.17128e+07	5.50548e+07	5.23017e+07	5.21693e+07	3.75519e+07	3.47211e+07	3.20874e+07	5.06313e+07	4.86691e+07	5.37798e+07	2.80913e+07	3.13585e+07	3.00222e+07	6.83023e+07	6.25892e+07	6.46326e+07	3.14042e+07	3.16309e+07	2.78544e+07	3.92348e+07	3.9752e+07	3.47176e+07	4.51845e+07	4.86024e+07	4.62489e+07	5.75678e+07	5.37726e+07	4.99887e+07	5.77644e+07	5.68183e+07	6.07253e+07	3.3477e+07	3.62449e+07	3.46161e+07	3.48923e+07	3.73717e+07	3.05121e+07	2.7664e+07	2.80852e+07	2.64052e+07	2.3501e+07	2.2659e+07	2.09881e+07	6.20349e+07
Ascorbic acid	163433	154101	156724	75155.4	67904.2	149892	505577	591989	538683	182894	129516	160732	453484	380105	394353	268489	234030	218360	115126	121897	106313	298995	356686	324106	255537	318169	298606	214727	245027	287483	268263	261886	246484	229820	318755	278496	226393	283602	217579	177205	155520	167102	167224	163473	183858	108625	106223	115475	406488
creatine	6.57551e+06	6.7419e+06	6.5927e+06	1.04263e+07	1.20649e+07	1.0783e+07	7.5155e+06	7.3966e+06	7.2051e+06	8.349e+07	8.07067e+07	9.31717e+07	3.03394e+07	2.99606e+07	2.94905e+07	4.94569e+06	4.93489e+06	5.18368e+06	1.16538e+07	1.18624e+07	1.25147e+07	1.75248e+07	2.04064e+07	1.76712e+07	7.59909e+06	7.16454e+06	7.24654e+06	2.12274e+07	2.14134e+07	2.20472e+07	1.56187e+07	1.52218e+07	1.41126e+07	1.53332e+07	1.4462e+07	1.54556e+07	3.75897e+07	3.40471e+07	3.58466e+07	1.45238e+07	1.40726e+07	1.44742e+07	1.34696e+07	1.3624e+07	1.34161e+07	1.07781e+07	1.09955e+07	1.02768e+07	1.18505e+07
cystine (2)	147320	134890	135586	22802.6	23392.1	24592.5	104770	103726	94051.1	136723	163304	117522	140613	167828	134704	114861	101490	85423.6	100737	86736.9	96166.9	101715	106947	87907.5	73672	72194.7	85979.7	69903	82977.4	94325.7	141314	135460	108266	74447.9	107519	86106.2	161700	122501	130071	189613	143701	126437	129358	89772.1	85834.7	6967.73	6003.55	24726.5	132694
Urea	5.0202e+07	5.30694e+07	4.99695e+07	7.45055e+07	8.33646e+07	9.13276e+07	3.08649e+07	3.3613e+07	3.75004e+07	7.07084e+07	7.16704e+07	6.98138e+07	3.70516e+07	4.16923e+07	4.26952e+07	5.92156e+07	5.68189e+07	5.89833e+07	3.47237e+07	3.80762e+07	3.8467e+07	3.73283e+07	3.74143e+07	3.76449e+07	4.19847e+07	4.55198e+07	4.48132e+07	2.48325e+07	2.86041e+07	3.00528e+07	7.7949e+07	8.08459e+07	7.54066e+07	2.51021e+07	2.98456e+07	2.95941e+07	4.40602e+07	4.95087e+07	4.88247e+07	7.92327e+07	8.16374e+07	7.80541e+07	4.09412e+07	4.34646e+07	4.2749e+07	5.44593e+07	5.66303e+07	5.82548e+07	2.58247e+07
L-Kynurenine (1)	1.11871e+06	1.0833e+06	1.15778e+06	1.55445e+06	1.54168e+06	1.62892e+06	1.31829e+06	1.27517e+06	1.33504e+06	932510	885355	790717	558403	516816	529449	1.2184e+06	1.10285e+06	1.1073e+06	478596	419828	445035	600614	823624	651919	1.13336e+06	1.09401e+06	867506	593438	642166	590539	845539	749555	775879	854606	796618	860449	1.05191e+06	1.16025e+06	1.13466e+06	1.66797e+06	1.70484e+06	1.4847e+06	1.92667e+06	1.53478e+06	1.56427e+06	1.14963e+06	1.03226e+06	892014	882723
N-acetyl-glutamine	819602	734026	1.06806e+06	1.03332e+06	1.03721e+06	1.03205e+06	672312	736798	614355	1.22833e+06	1.39885e+06	1.37641e+06	733972	777952	873995	1.2487e+06	1.31113e+06	1.27013e+06	383478	449263	416326	544761	709341	688764	584471	632478	642373	565466	595895	624867	754234	785163	759093	513297	411880	315662	1.12254e+06	1.11762e+06	1.02061e+06	1.72462e+06	1.66882e+06	1.71836e+06	872972	791867	719599	1.01616e+06	1.07543e+06	970122	924735
Succinic acid_neg	37826.9	24776.6	26501.8	73608.1	82063	61367.4	115910	93981.8	80912.5	46372.7	50773.7	32914	59346.3	48788.1	48675.5	67544.9	69600.5	60995.3	49604.8	27859.8	27687.6	104208	104879	93860.8	86907.6	66335.8	83559.6	70908.1	71967.3	51792.3	32278.8	31689.8	49351.3	50510.6	60088.5	54776.2	46352.1	52719.8	52819	75367.6	63086.3	61553.6	71367.9	46396.7	63263.6	51303.8	27680.6	51434	89056.5
Lysine + glutamine	1.25813e+07	1.19002e+07	1.13381e+07	9.86411e+06	9.60662e+06	1.0054e+07	7.16559e+06	7.24392e+06	6.73776e+06	1.17563e+07	1.13077e+07	1.10055e+07	1.91784e+07	1.97406e+07	1.88951e+07	1.94295e+07	1.754e+07	1.86911e+07	1.60886e+07	1.6443e+07	1.53359e+07	4.48983e+06	4.94623e+06	4.61926e+06	1.09232e+07	1.04041e+07	1.03271e+07	1.32917e+07	1.38132e+07	1.47521e+07	1.6816e+07	1.4425e+07	1.32496e+07	1.10669e+07	1.09913e+07	9.83159e+06	1.80235e+07	1.76994e+07	1.76926e+07	1.68426e+07	1.64925e+07	1.64121e+07	9.32917e+06	8.40491e+06	8.54437e+06	1.14865e+07	1.08356e+07	9.83701e+06	2.06191e+07
mevalonic acid	4.73549e+06	4.5982e+06	4.76344e+06	2.6879e+06	3.19828e+06	3.0915e+06	6.08703e+06	6.88678e+06	6.76457e+06	4.15931e+06	4.38661e+06	4.13045e+06	4.21433e+06	4.82937e+06	5.08261e+06	5.43535e+06	5.5856e+06	5.70255e+06	4.24848e+06	3.89967e+06	3.82426e+06	6.40322e+06	6.62177e+06	6.39611e+06	5.85019e+06	5.48858e+06	5.42316e+06	3.29733e+06	3.61033e+06	3.49589e+06	6.66849e+06	6.39192e+06	6.20345e+06	5.78682e+06	5.84176e+06	5.58397e+06	3.69881e+06	3.70894e+06	3.63838e+06	5.65222e+06	5.49288e+06	5.71309e+06	4.75362e+06	4.31874e+06	4.32022e+06	5.26503e+06	5.02994e+06	4.80593e+06	5.44483e+06
Glycerophosphocholine	7.94378e+06	7.69174e+06	7.21617e+06	8.87746e+06	8.72074e+06	9.39885e+06	1.85846e+07	1.75352e+07	1.89267e+07	6.257e+06	6.12593e+06	6.42399e+06	9.56992e+06	9.20872e+06	9.70157e+06	2.06926e+07	2.07884e+07	2.02805e+07	2.6152e+07	2.82961e+07	2.83129e+07	1.79245e+07	2.09328e+07	1.78392e+07	1.75109e+07	1.70925e+07	1.98734e+07	2.63756e+07	2.96142e+07	2.69255e+07	1.38368e+07	1.31785e+07	1.27624e+07	2.41962e+07	2.13424e+07	2.1777e+07	1.94635e+07	2.01291e+07	2.14882e+07	2.16875e+07	2.12053e+07	2.07222e+07	2.18403e+07	2.4156e+07	2.35515e+07	1.12684e+07	1.18745e+07	1.11227e+07	7.92257e+06
indole	8.0807e+06	9.24264e+06	9.04415e+06	7.70579e+06	9.21184e+06	1.00731e+07	1.14692e+07	1.23545e+07	1.42301e+07	6.71854e+06	7.42766e+06	7.28165e+06	1.38552e+07	1.50665e+07	1.68037e+07	1.6458e+07	1.59276e+07	1.95981e+07	8.03674e+06	8.31405e+06	8.59755e+06	1.57735e+07	1.7049e+07	1.64167e+07	1.05733e+07	1.04262e+07	1.06639e+07	3.08223e+06	3.66027e+06	4.03027e+06	9.48211e+06	1.00724e+07	9.73307e+06	1.31839e+07	1.41804e+07	1.54017e+07	1.44399e+07	1.61849e+07	1.79568e+07	6.74712e+06	7.42407e+06	7.07099e+06	6.91008e+06	6.60167e+06	7.10001e+06	6.41905e+06	6.6687e+06	6.17806e+06	1.79237e+07
uracil	772954	830254	827925	768451	706130	690459	713417	618089	674958	924885	938041	883949	1.02385e+06	933073	979672	1.43569e+06	1.46963e+06	1.34869e+06	1.03316e+06	962275	847703	1.14569e+06	1.1404e+06	895773	798031	849815	728353	668632	761465	738989	847037	828869	790462	635075	639850	621312	861212	886575	1.00325e+06	1.21038e+06	1.27183e+06	1.29045e+06	806850	842663	732673	453747	417626	424572	1.17855e+06
3-hydroxykynurenine	4.22244e+07	5.55704e+07	4.94388e+07	3.39515e+07	5.32913e+07	4.26648e+07	3.75709e+07	5.58559e+07	4.80448e+07	4.3834e+07	4.92755e+07	4.16519e+07	3.82116e+07	5.03953e+07	4.36552e+07	3.81766e+07	4.12441e+07	1.549e+07	5.55936e+07	5.46347e+07	3.98366e+07	6.59879e+07	5.23848e+07	4.14245e+07	4.40344e+07	4.33502e+07	3.94791e+07	3.23777e+07	4.68898e+07	4.19722e+07	5.38477e+07	4.88931e+07	3.98151e+07	4.15005e+07	4.97412e+07	5.09982e+07	3.943e+07	4.4485e+07	4.64327e+07	4.76557e+07	4.53796e+07	3.78951e+07	5.05117e+07	4.49585e+07	4.55708e+07	5.34437e+07	4.71195e+07	4.47607e+07	5.14062e+07
1,4-diaminobutane	3.49263e+06	3.15542e+06	3.47763e+06	2.21002e+06	1.71782e+06	2.64419e+06	2.21805e+06	2.45102e+06	1.16239e+06	4.7796e+06	7.03595e+06	4.16754e+06	2.20178e+06	2.90052e+06	3.09104e+06	552117	1.1075e+06	934126	2.29293e+06	2.04644e+06	2.36248e+06	2.47169e+06	1.66553e+06	1.57069e+06	2.86654e+06	3.87726e+06	3.07914e+06	2.27327e+06	1.93351e+06	2.84099e+06	2.28652e+06	2.36451e+06	3.71696e+06	2.17998e+06	1.72181e+06	2.4047e+06	2.15628e+06	307164	1.3964e+06	3.92506e+06	3.54e+06	3.30176e+06	3.93432e+06	3.01769e+06	3.38414e+06	4.371e+06	3.79483e+06	3.85475e+06	3.13141e+06
beta aminobutyric acid	1.59746e+06	1.57043e+06	1.39365e+06	1.6473e+06	1.80992e+06	1.88944e+06	2.04502e+06	2.4238e+06	2.44865e+06	1.37516e+06	1.48801e+06	1.42152e+06	2.28911e+06	2.35979e+06	2.44326e+06	2.55267e+06	2.49225e+06	2.63732e+06	2.2024e+06	2.40598e+06	2.3813e+06	1.95359e+06	2.05344e+06	2.31673e+06	1.75766e+06	1.82508e+06	2.05332e+06	2.91472e+06	2.85603e+06	2.83615e+06	2.44652e+06	2.61792e+06	2.50142e+06	2.02951e+06	2.16586e+06	2.3272e+06	1.96492e+06	1.99224e+06	1.98055e+06	2.36335e+06	2.66274e+06	2.71332e+06	2.27697e+06	2.12851e+06	2.32822e+06	960741	1.05933e+06	1.09466e+06	1.57062e+06
L-Arginine (1)	1.04831e+07	1.11921e+07	1.09118e+07	7.92909e+06	8.76983e+06	7.98563e+06	3.99977e+07	4.30329e+07	4.35857e+07	1.15726e+07	1.12143e+07	1.09437e+07	2.2466e+07	2.28732e+07	2.33685e+07	1.57213e+07	1.49274e+07	1.47648e+07	6.64557e+06	6.7542e+06	6.65447e+06	2.05752e+07	2.51997e+07	2.27552e+07	2.07054e+07	1.83911e+07	2.0352e+07	7.58851e+06	8.04253e+06	7.88502e+06	1.21123e+07	1.23278e+07	1.08286e+07	2.58763e+07	2.61468e+07	2.73667e+07	1.29216e+07	1.3425e+07	1.3418e+07	1.41135e+07	1.52274e+07	1.41776e+07	1.14134e+07	1.06004e+07	1.06617e+07	625105	754011	257579	2.73947e+07
L-Homoserine	78788.8	92137.9	99310.8	16904.9	26866.1	109782	83389	104617	92969	127626	77573.2	89208.5	50505.5	114961	88920.8	115445	107015	134888	85354	78937.9	81829.1	105909	135573	100997	100806	106950	94536	12091.5	27193.2	13637.2	124167	108701	148929	118392	109036	129481	91652.8	93200.9	74485.3	90866.6	77457.4	94417.3	41064.6	104409	81441.1	102396	147169	100004	126012
5-Hydroxy-L-tryptophan	117761	116793	50958.8	108182	120861	78454.7	141133	135810	92692.6	103033	70045.8	11482.8	200889	122125	125560	214374	214592	63236	99386.1	85129.1	14020.5	190829	169032	25115.2	135821	96362.6	22195.5	159821	22464.9	21213.4	144147	102166	25642.3	161549	148354	103345	191415	184567	100491	68749.5	72696.4	6793.83	62048.9	81036	23188.1	44747.8	43514.7	28987.5	215337
Inosine	1.30669e+07	1.12121e+07	1.2227e+07	1.88693e+06	1.20179e+06	898864	121840	62025.4	56793.6	1.74363e+06	1.31867e+06	1.00986e+06	3.80623e+06	2.33953e+06	2.67147e+06	9.92571e+06	7.79187e+06	9.37367e+06	1.19752e+07	8.05455e+06	9.37425e+06	21601.1	18759.8	24442.4	4.396e+06	3.83094e+06	3.77786e+06	80704.4	47565.6	73810.3	2.31473e+07	1.56591e+07	1.94894e+07	94493.3	42277.5	126943	1.87317e+07	1.39653e+07	1.93062e+07	237978	260175	361981	5.66202e+06	4.56209e+06	3.55226e+06	2.0349e+07	1.73227e+07	1.53195e+07	373760
betaine	5.17092e+07	5.75686e+07	6.07441e+07	5.32527e+07	6.05457e+07	5.81127e+07	6.3923e+07	6.46774e+07	7.18618e+07	4.21173e+07	3.96844e+07	4.53505e+07	5.46073e+07	5.23024e+07	5.51333e+07	4.22675e+07	4.41503e+07	3.9607e+07	4.67686e+07	4.77476e+07	4.60365e+07	2.77291e+07	3.19728e+07	3.38822e+07	7.17661e+07	7.33488e+07	7.96189e+07	4.48311e+07	4.87193e+07	4.64064e+07	5.21815e+07	5.24166e+07	4.3117e+07	3.86552e+07	3.97563e+07	4.14169e+07	6.10986e+07	6.03326e+07	5.18215e+07	5.5167e+07	5.85219e+07	5.38479e+07	9.05712e+07	9.00511e+07	9.23823e+07	6.75964e+07	7.06515e+07	6.40952e+07	5.34831e+07
L-Lactic acid_neg	579955	524972	402757	938747	705622	611965	481220	426869	375540	1.00665e+06	878913	745073	692726	588797	511350	1.49033e+06	1.23022e+06	1.0645e+06	853051	708319	643966	675582	616303	565250	895703	799099	625004	805015	684520	504485	549168	461975	516239	730550	642942	556590	1.03854e+06	907536	780445	1.08159e+06	892940	824478	958701	755969	566019	612074	550572	466028	706159
3-Aminoisobutanoic acid	288464	249458	254968	298361	352707	401626	423559	397345	440119	248045	253354	249868	413788	348046	386968	440575	509990	389443	330357	372520	411814	319663	355344	390303	330414	343149	391059	499985	500954	500788	421624	448017	407944	375838	373435	427250	304126	309328	348490	395848	384193	530632	395068	402354	387887	243609	209485	198822	232507
Aminoadipic acid_1	747830	787862	626206	1.14657e+06	905686	967871	794905	707270	732053	797394	663603	487458	696134	800056	719274	714088	749908	705488	892642	911016	758512	689708	616312	538766	892038	825812	892766	923652	761749	830954	881642	889420	655625	706430	754725	802354	907989	732609	771697	863329	755583	635549	870270	774738	793979	814264	1.07805e+06	949082	716048
Gamma-Aminobutyric acid	5.65829e+06	6.50475e+06	5.6285e+06	7.08016e+06	6.84195e+06	6.72921e+06	8.65947e+06	9.4399e+06	9.08293e+06	5.54743e+06	5.62459e+06	5.61234e+06	8.02358e+06	8.18735e+06	8.61494e+06	9.5216e+06	8.96641e+06	9.49659e+06	8.34246e+06	8.34551e+06	8.86117e+06	7.41702e+06	7.73593e+06	9.14877e+06	6.88057e+06	6.7593e+06	8.01174e+06	1.0416e+07	1.10139e+07	1.08822e+07	9.04999e+06	1.01572e+07	9.82043e+06	8.1872e+06	8.51463e+06	8.70109e+06	6.77235e+06	7.05648e+06	7.69988e+06	8.91545e+06	9.17435e+06	1.06327e+07	7.80227e+06	8.25228e+06	9.06981e+06	4.18513e+06	3.8934e+06	3.9751e+06	5.9803e+06
Glutamate	6.45528e+06	6.60352e+06	6.35419e+06	1.74473e+07	1.91681e+07	1.86728e+07	3.80227e+07	3.92783e+07	3.56711e+07	1.11329e+07	1.17039e+07	9.55169e+06	1.71543e+07	1.52331e+07	1.45765e+07	8.67779e+06	8.89296e+06	8.34688e+06	1.74067e+07	1.67808e+07	1.60114e+07	2.51598e+07	2.69823e+07	2.14815e+07	2.25144e+07	2.24656e+07	2.00908e+07	2.69828e+07	2.53233e+07	2.59578e+07	1.77902e+07	1.61956e+07	1.48058e+07	4.02059e+07	4.1027e+07	3.75967e+07	9.81036e+06	1.10607e+07	9.68612e+06	1.67365e+07	1.52168e+07	1.4484e+07	3.02165e+07	3.00195e+07	3.09202e+07	8.31944e+06	8.55262e+06	7.82511e+06	2.26028e+07
riboflavin	146523	133250	107001	193540	167009	139906	185589	181399	110240	221939	186223	153103	178301	162080	105030	149033	119285	4881.83	119617	125275	86726.9	189125	165044	83361.7	242638	237301	128116	225604	234552	177615	199907	138294	123657	273610	191397	198822	183743	152769	141355	156631	126871	82198.4	318056	239116	188218	136497	134162	115942	139178
1-Methylnicotinamide	7.05459e+06	6.83616e+06	6.31222e+06	1.60504e+07	1.43653e+07	1.53778e+07	6.416e+06	4.68259e+06	4.9976e+06	7.54405e+06	7.04497e+06	6.79883e+06	1.84526e+07	1.64847e+07	1.87793e+07	1.27507e+07	1.10918e+07	1.126e+07	2.44945e+07	2.31494e+07	2.20972e+07	1.5201e+06	1.51114e+06	1.32773e+06	1.35788e+07	1.51485e+07	1.30909e+07	5.44476e+06	5.08667e+06	4.48716e+06	1.78802e+07	1.7491e+07	1.65666e+07	1.28172e+07	1.15173e+07	1.16352e+07	8.70634e+06	9.53219e+06	9.02097e+06	4.79726e+06	4.18854e+06	4.024e+06	2.16554e+07	2.17788e+07	2.00577e+07	8.11055e+06	7.64442e+06	6.92229e+06	4.84074e+06
hypoxanthine	1.08124e+07	1.06053e+07	9.39251e+06	2.34958e+07	2.23191e+07	2.10424e+07	9.77455e+06	6.87991e+06	7.92075e+06	1.10563e+07	1.04667e+07	1.03795e+07	2.9369e+07	2.50971e+07	2.78996e+07	1.76287e+07	1.77123e+07	1.74916e+07	3.68175e+07	3.6916e+07	3.51659e+07	2.3106e+06	2.58746e+06	1.99119e+06	2.19836e+07	2.04742e+07	1.93288e+07	8.52667e+06	7.22058e+06	6.70334e+06	2.83571e+07	2.61837e+07	2.44545e+07	1.8741e+07	1.93374e+07	1.68175e+07	1.4672e+07	1.38229e+07	1.30494e+07	6.88759e+06	6.60998e+06	6.88376e+06	3.27968e+07	2.93769e+07	3.04001e+07	1.20043e+07	1.25714e+07	1.08042e+07	8.40826e+06
1-Methyladenosine	1.58728e+06	1.49335e+06	1.19643e+06	948349	658373	605409	1.2839e+06	940013	867896	1.6625e+06	1.38782e+06	1.59637e+06	909464	833047	843342	2.59682e+06	1.93618e+06	1.4869e+06	891385	699153	728777	1.4267e+06	1.3381e+06	1.054e+06	2.17058e+06	1.7238e+06	1.73519e+06	658884	631423	543781	728216	477272	530008	1.0188e+06	901233	875185	2.28521e+06	2.10797e+06	1.95477e+06	1.50724e+06	1.20727e+06	1.35434e+06	1.42305e+06	1.13981e+06	992468	569625	518770	427281	1.48992e+06
creatinine	1.03355e+07	9.64975e+06	9.98098e+06	1.42813e+07	1.40616e+07	1.53612e+07	8.54688e+06	9.58052e+06	1.00141e+07	6.78301e+06	6.37439e+06	6.79183e+06	6.39736e+06	6.21018e+06	5.88038e+06	6.57366e+06	7.19114e+06	7.94831e+06	4.29615e+06	3.90058e+06	4.25717e+06	4.97023e+06	5.50479e+06	5.26283e+06	5.84231e+06	5.76911e+06	5.8633e+06	6.51257e+06	6.87189e+06	7.22486e+06	7.97466e+06	8.53891e+06	7.83716e+06	4.40684e+06	4.55717e+06	4.90529e+06	7.15516e+06	7.44369e+06	8.74967e+06	1.2096e+07	1.29874e+07	1.28226e+07	9.14839e+06	8.86057e+06	9.7381e+06	8.30608e+06	8.67263e+06	8.7759e+06	7.56238e+06
Deoxyribose 1-phosphate_neg	90519.6	91056.7	43129	87819.3	86646.2	63246.6	59540.6	99318.4	92270	94181.2	75465.8	53480.3	82567.8	102629	92616.9	65385.8	78724.3	75506.8	85651.1	69399.5	53734.1	66468.9	62796.9	42377.7	85098.5	55822.4	57692.9	79432.3	91000	68945.9	85466.4	88482	47214.4	100826	76471	92209.7	43019.4	93518.1	76760.7	125909	74368.2	59459.2	77595.6	77343	79674.8	54516.7	57537.8	54844.7	62946.5
D-glucuronic acid	2.08122e+08	1.90361e+08	1.85317e+08	2.76734e+08	2.62092e+08	2.46238e+08	2.53607e+08	2.28987e+08	2.17194e+08	1.64958e+08	1.35257e+08	1.16139e+08	4.40295e+08	4.47738e+08	4.29319e+08	2.05877e+08	1.77208e+08	1.22693e+08	5.54815e+08	5.43598e+08	4.02502e+08	2.15838e+08	1.96032e+08	1.66372e+08	6.3925e+08	6.38497e+08	5.15046e+08	1.90843e+08	1.76983e+08	1.67667e+08	2.30418e+08	1.83249e+08	1.46223e+08	2.20355e+08	2.18979e+08	1.95267e+08	2.31928e+08	2.10496e+08	1.87884e+08	2.03834e+08	1.68091e+08	1.34332e+08	9.32095e+08	8.99248e+08	7.72466e+08	3.26077e+08	3.01639e+08	2.62072e+08	1.68635e+08
L-Alanine	1.811e+06	1.55481e+06	1.81426e+06	2.53117e+06	2.09147e+06	2.02917e+06	3.7939e+06	3.18876e+06	3.32618e+06	5.01562e+06	4.65264e+06	4.91148e+06	4.00494e+06	3.6326e+06	3.55855e+06	1.9748e+06	2.04617e+06	2.05143e+06	3.13834e+06	2.75836e+06	3.05491e+06	2.508e+06	2.93805e+06	2.38414e+06	3.0926e+06	2.30793e+06	2.61056e+06	3.52019e+06	3.62603e+06	3.15486e+06	3.35689e+06	2.86539e+06	2.67553e+06	3.82511e+06	3.23164e+06	3.64014e+06	3.57202e+06	2.90787e+06	3.52055e+06	3.21446e+06	2.88025e+06	3.01466e+06	4.19461e+06	3.42663e+06	3.66546e+06	1.77869e+06	1.70897e+06	1.65077e+06	3.35665e+06
Pipecolic acid	4.38078e+07	4.48661e+07	4.2713e+07	5.94018e+07	5.60865e+07	5.31478e+07	3.05889e+07	2.87761e+07	2.77944e+07	5.33603e+07	5.38378e+07	4.66932e+07	8.74955e+07	8.07928e+07	8.3833e+07	7.15825e+07	7.132e+07	7.47908e+07	7.65135e+07	7.87837e+07	7.90835e+07	2.39405e+07	2.01332e+07	1.92944e+07	3.295e+07	3.40108e+07	3.54154e+07	8.7553e+07	8.63485e+07	8.40629e+07	8.78677e+07	8.89018e+07	7.71528e+07	7.29902e+07	6.51504e+07	6.14101e+07	5.19909e+07	5.31329e+07	5.00424e+07	6.98695e+07	7.23253e+07	6.74178e+07	7.13435e+07	6.44394e+07	6.1887e+07	9.04219e+07	9.39717e+07	8.08855e+07	4.67896e+07
sarcosine	1.72109e+06	1.54884e+06	1.81182e+06	2.24177e+06	2.24187e+06	2.53099e+06	3.29768e+06	3.45737e+06	3.76067e+06	5.66191e+06	5.28936e+06	6.03692e+06	3.50406e+06	3.70477e+06	3.81567e+06	1.85208e+06	1.9986e+06	1.98421e+06	3.11511e+06	3.15945e+06	3.4731e+06	2.57955e+06	3.14025e+06	2.76582e+06	2.87335e+06	2.99823e+06	2.47476e+06	3.60182e+06	4.48258e+06	4.28681e+06	3.26127e+06	3.60403e+06	2.86578e+06	3.49139e+06	4.15462e+06	4.36682e+06	3.27922e+06	3.41072e+06	4.23963e+06	3.54015e+06	3.70623e+06	3.19607e+06	4.11052e+06	3.98061e+06	4.37996e+06	2.16227e+06	1.72729e+06	2.05981e+06	3.49052e+06
N-Acetylglutamic acid (1)_neg	131426	125826	146184	106952	140553	155072	81342.6	74066.7	80159.5	152623	155662	176947	219566	233030	243786	138816	213691	242088	168578	192126	202839	62363.1	64326.7	84417	155262	161762	172853	187324	246906	253281	203269	247750	268958	218811	178597	223384	128525	149364	150443	162515	183001	193758	246605	201697	254241	218002	190407	231125	112132
Imidazole	2.8861e+06	4.64873e+07	3.08217e+07	148511	3.03651e+07	4.21871e+07	284079	5.53933e+07	4.26385e+07	4.58292e+07	4.23201e+07	1.82779e+07	534653	5.23937e+07	4.09313e+07	6.60482e+06	6.34324e+07	3.78477e+07	1.55188e+07	5.25192e+07	1.82772e+07	3.73725e+07	3.11845e+07	1.85613e+07	2.16252e+07	5.77776e+07	1.68965e+07	385630	4.19382e+07	3.89517e+07	2.51235e+07	5.19699e+07	1.77363e+07	2.20332e+06	4.55106e+07	3.61399e+07	757825	5.61075e+07	3.8648e+07	3.31159e+07	5.38813e+07	1.85729e+07	1.10094e+07	5.77459e+07	2.34775e+07	1.55117e+07	5.91671e+07	3.7802e+07	3.19497e+07
methylsuccinic acid	293707	211219	237137	437977	437415	371432	323379	253052	261870	3.28032e+06	2.84538e+06	3.1232e+06	1.35539e+06	1.09584e+06	1.11276e+06	212043	215633	224074	495333	419458	430774	640377	709026	659064	357491	248475	275239	929726	887300	809972	622221	511700	499281	583977	526494	557272	1.41389e+06	1.41563e+06	1.24683e+06	652937	547146	475305	563827	561574	463835	487011	390195	387394	505390
Metanephrine	4.18753e+06	3.31309e+06	2.70986e+06	5.51273e+06	4.94352e+06	3.88814e+06	3.17993e+06	3.21156e+06	2.87986e+06	4.22254e+06	3.60419e+06	2.95915e+06	4.52997e+06	3.87291e+06	3.16462e+06	5.50863e+06	3.94513e+06	1.57119e+06	5.2785e+06	3.45386e+06	2.72815e+06	6.28117e+06	4.70006e+06	3.20665e+06	5.10834e+06	3.28351e+06	2.87858e+06	6.75232e+06	6.95235e+06	5.37771e+06	3.74556e+06	2.68011e+06	2.00378e+06	4.65725e+06	3.5636e+06	2.98963e+06	3.90052e+06	2.92027e+06	2.80129e+06	3.69359e+06	2.88753e+06	2.04806e+06	4.73891e+06	2.89926e+06	2.35636e+06	5.76978e+06	4.11531e+06	3.36636e+06	4.73654e+06
palmitic acid_neg	2.72548e+07	3.11514e+07	2.65311e+07	2.37251e+07	2.4231e+07	2.1023e+07	2.70371e+07	3.09773e+07	2.48818e+07	2.85546e+07	2.47016e+07	2.3716e+07	4.04516e+07	4.34912e+07	3.56965e+07	3.29218e+07	3.10065e+07	2.57931e+07	2.88566e+07	2.74075e+07	2.09914e+07	3.05368e+07	3.00358e+07	2.6804e+07	3.46568e+07	2.6297e+07	2.54467e+07	3.33729e+07	3.87478e+07	2.90308e+07	2.42103e+07	2.46576e+07	2.16872e+07	3.31008e+07	2.825e+07	2.46147e+07	3.39395e+07	3.43494e+07	3.26037e+07	1.8199e+07	2.53066e+07	2.16746e+07	5.80876e+07	5.68435e+07	5.10036e+07	3.66654e+07	3.33029e+07	2.66408e+07	2.30404e+07
histamine	47656.2	39816.3	42739.7	50952.1	72841.2	103010	111519	89563.1	83729	47479	52474.5	53022.1	41109.1	73438.6	23557.1	61085.1	30640	60164.2	49121.7	66959.3	19228.1	22339.7	28078.4	34723.2	43672.3	42003.2	47095.1	37068.8	79687.1	78999.9	79758.7	76190.7	74277.4	30422.9	44290.4	39079.3	45485.1	50090.7	11116.6	65403.5	50858.9	71838.1	109981	86336.7	65217.2	110022	106572	113135	35841.9
AICA-riboside	141616	166980	88487.9	230332	223133	131024	106210	211136	157621	163978	107448	102833	124412	213005	169997	107295	119262	246569	197563	176187	123604	139567	110839	128600	202744	173387	154734	168737	202521	153763	183401	142348	103779	142073	241131	145986	147529	143918	148551	168094	177176	137556	215678	202701	136594	169052	192130	119073	171141
[truncated: 8 more columns]

## Sheet: control
	15	15	15	40	40	40	52	52	52	64	64	64	75	75	75	83	83	83	89	89	89	98	98	98	102	102	102	18	18	18	22	22	22	25	25	25	28	28	28	30	30	30	36	36	36	38	38	38	43
	1	2	3	4	5	6	7	8	9	10	11	12	13	14	15	16	17	18	19	20	21	22	23	24	25	26	27	28	29	30	31	32	33	34	35	36	37	38	39	40	41	42	43	44	45	46	47	48	49
Mevalonolactone	6.83919e+06	7.14367e+06	7.22661e+06	1.1488e+07	1.17984e+07	1.191e+07	7.31772e+06	8.03968e+06	6.7589e+06	5.14018e+06	5.64692e+06	5.68801e+06	4.96404e+06	5.38378e+06	4.56031e+06	5.6871e+06	6.33363e+06	6.77528e+06	6.93313e+06	7.41836e+06	6.58393e+06	5.74657e+06	6.60866e+06	5.47176e+06	6.62522e+06	7.32864e+06	7.55875e+06	7.47226e+06	8.05049e+06	7.25946e+06	7.62475e+06	8.90003e+06	8.33463e+06	4.75805e+06	5.55257e+06	4.33355e+06	7.07805e+06	7.66903e+06	7.44853e+06	5.39986e+06	5.9509e+06	5.6858e+06	9.44527e+06	1.02134e+07	9.59281e+06	6.65747e+06	7.58216e+06	7.18351e+06	7.15751e+06
inositol	2.50308e+06	2.83454e+06	2.71135e+06	349363	590977	699678	1.97413e+06	2.28441e+06	2.06779e+06	4.2769e+06	4.66203e+06	4.54251e+06	2.06865e+06	2.69844e+06	2.25971e+06	2.26385e+06	2.63223e+06	2.78062e+06	2.48228e+06	3.03603e+06	2.68486e+06	2.39577e+06	2.74531e+06	2.41768e+06	2.34765e+06	2.84906e+06	2.20308e+06	1.22936e+06	1.49298e+06	1.17751e+06	2.18021e+06	2.42929e+06	2.20682e+06	3.52466e+06	3.77195e+06	3.85559e+06	2.12021e+06	2.59935e+06	2.5602e+06	931333	1.45072e+06	887653	1.33389e+06	1.76418e+06	957973	1.13136e+06	1.37705e+06	1.56174e+06	1.16985e+06
L-Dihydroorotic acid_neg	1.16891e+07	1.31392e+07	1.33302e+07	5.5917e+06	7.41054e+06	6.664e+06	1.3704e+07	1.50345e+07	1.51017e+07	1.26056e+07	1.45495e+07	1.3582e+07	8.08664e+06	8.54395e+06	7.70183e+06	1.01791e+07	1.14604e+07	1.18439e+07	1.24564e+07	1.31617e+07	1.33488e+07	1.07991e+07	1.09756e+07	1.10825e+07	1.07012e+07	1.1373e+07	1.00296e+07	1.3463e+07	1.45247e+07	1.45972e+07	1.20492e+07	1.34773e+07	1.25054e+07	1.52904e+07	1.63897e+07	1.48289e+07	1.63797e+07	1.78098e+07	1.66746e+07	1.17638e+07	1.35133e+07	1.30512e+07	1.34208e+07	1.46088e+07	1.4127e+07	1.25171e+07	1.37183e+07	1.29887e+07	1.25749e+07
5-methoxytryptophan (2)	4.81052e+06	5.8234e+06	5.46352e+06	8.39545e+06	9.01632e+06	8.34969e+06	1.51594e+06	2.01768e+06	2.41561e+06	2.95503e+06	3.51315e+06	3.56166e+06	2.6852e+06	3.01035e+06	2.5486e+06	2.76202e+06	3.05664e+06	2.72827e+06	2.65056e+06	3.27819e+06	3.65074e+06	2.74825e+06	3.18455e+06	2.59402e+06	3.53803e+06	4.33077e+06	3.31262e+06	3.74722e+06	4.17294e+06	3.78013e+06	4.73158e+06	5.11812e+06	5.49539e+06	3.86628e+06	4.5493e+06	3.46981e+06	3.16267e+06	3.79823e+06	3.86118e+06	3.40399e+06	3.77657e+06	3.29334e+06	4.86645e+06	5.7726e+06	4.74346e+06	2.99753e+06	3.15889e+06	3.19955e+06	5.56532e+06
carnosine	1.97684e+07	2.04689e+07	1.95235e+07	3.18155e+07	3.28324e+07	3.19808e+07	2.05894e+07	2.24498e+07	2.18687e+07	1.58129e+07	1.82704e+07	1.5357e+07	1.64443e+07	1.74661e+07	1.74356e+07	1.28779e+07	1.49357e+07	1.45201e+07	1.30092e+07	1.45035e+07	1.56626e+07	1.66967e+07	1.74673e+07	1.71692e+07	9.42503e+06	1.18113e+07	1.22283e+07	1.74216e+07	2.01047e+07	1.71978e+07	3.12699e+07	3.39341e+07	3.07537e+07	1.08842e+07	1.27911e+07	1.32909e+07	2.18417e+07	2.33308e+07	2.39098e+07	1.45143e+07	1.6215e+07	1.47456e+07	1.59511e+07	1.85335e+07	1.9332e+07	1.69961e+07	1.92807e+07	1.92057e+07	2.85927e+07
aminoimidazole carboxamide ribonucleotide	3.7779e+06	4.95845e+06	4.83872e+06	3.47278e+06	4.65348e+06	3.51496e+06	2.23763e+06	3.57567e+06	3.2975e+06	4.18419e+06	4.51205e+06	4.23025e+06	1.01054e+07	1.11121e+07	9.74711e+06	719789	1.72811e+06	1.67139e+06	7.46204e+06	8.10739e+06	7.02052e+06	8.77972e+06	9.99666e+06	9.58005e+06	4.40852e+06	5.19523e+06	5.74171e+06	5.97298e+06	7.05447e+06	6.43385e+06	1.41187e+06	1.58172e+06	1.64525e+06	1.22663e+06	2.60182e+06	1.83132e+06	9.75299e+06	1.10935e+07	1.04775e+07	6.20497e+06	7.08617e+06	5.62983e+06	1.04146e+07	1.18729e+07	1.12783e+07	74421.2	1.3266e+06	1.00405e+06	1.13791e+06
Imidazoleacetic acid	5.53298e+07	6.13307e+07	5.22277e+07	6.8049e+07	7.03396e+07	6.82207e+07	5.83718e+07	6.28333e+07	5.51439e+07	7.04424e+07	7.59507e+07	7.67762e+07	5.48309e+07	5.9177e+07	5.13557e+07	5.70855e+07	6.05064e+07	5.89201e+07	6.52453e+07	6.93948e+07	6.3523e+07	4.49132e+07	4.8164e+07	5.09034e+07	4.60398e+07	5.49574e+07	4.82183e+07	5.85784e+07	6.71279e+07	6.25485e+07	5.71112e+07	6.49207e+07	6.05693e+07	7.61597e+07	8.27755e+07	8.25366e+07	8.03437e+07	8.78812e+07	8.17036e+07	9.76876e+07	1.02335e+08	9.35142e+07	6.82682e+07	7.64721e+07	7.5089e+07	5.59046e+07	6.47578e+07	6.09706e+07	9.54594e+07
cystathionine	1.46812e+07	1.63678e+07	1.7945e+07	9.91214e+06	1.27156e+07	1.15867e+07	1.0114e+07	1.12771e+07	1.08279e+07	6.56174e+06	9.05356e+06	6.43295e+06	9.69448e+06	1.16991e+07	9.57708e+06	6.5514e+06	9.55093e+06	8.72714e+06	1.03316e+07	1.35081e+07	1.28864e+07	1.1343e+07	1.45681e+07	1.36355e+07	1.04748e+07	1.2381e+07	1.38281e+07	1.15166e+07	1.5042e+07	1.33476e+07	2.29033e+07	2.57554e+07	2.43007e+07	1.76275e+07	1.91127e+07	1.65895e+07	1.31557e+07	1.40217e+07	1.27001e+07	7.91181e+06	9.71929e+06	7.35399e+06	5.99062e+06	9.44072e+06	7.32948e+06	1.22015e+07	1.40872e+07	1.22357e+07	1.06211e+07
D-Sedoheptulose 7-phosphate (1)_neg	1.85899e+06	1.95839e+06	2.03376e+06	797710	981483	883858	1.41191e+06	1.61509e+06	1.47421e+06	1.29208e+06	1.56332e+06	1.56658e+06	1.47317e+06	1.71719e+06	1.40295e+06	1.44082e+06	1.77221e+06	1.52013e+06	1.12459e+06	1.36347e+06	1.10397e+06	1.58038e+06	1.79777e+06	1.87118e+06	1.50992e+06	1.69485e+06	1.76205e+06	2.19461e+06	2.22662e+06	2.19752e+06	2.13391e+06	2.30243e+06	2.04062e+06	1.7185e+06	1.81534e+06	1.69277e+06	1.91225e+06	2.03668e+06	2.01268e+06	2.69471e+06	2.87089e+06	2.97207e+06	1.93924e+06	2.06614e+06	2.06039e+06	1.80899e+06	2.07822e+06	1.78837e+06	1.27999e+06
suberic acid	1.52941e+07	1.72449e+07	1.62595e+07	1.44063e+07	1.6058e+07	1.49113e+07	1.55097e+07	1.68758e+07	1.6426e+07	1.03952e+07	1.18832e+07	1.06601e+07	1.30321e+07	1.39566e+07	1.35507e+07	1.08408e+07	1.18829e+07	1.19942e+07	1.06231e+07	1.18635e+07	1.12341e+07	1.40331e+07	1.56642e+07	1.52261e+07	8.4755e+06	9.46074e+06	9.84677e+06	1.2967e+07	1.39267e+07	1.24691e+07	1.17166e+07	1.31041e+07	1.20498e+07	1.2153e+07	1.31302e+07	1.28058e+07	1.55444e+07	1.66236e+07	1.62475e+07	1.39534e+07	1.47206e+07	1.54517e+07	1.20646e+07	1.30419e+07	1.28366e+07	1.90422e+07	1.92579e+07	1.89029e+07	1.48914e+07
Methionine sulfoxide	6.44404e+06	6.9251e+06	7.24548e+06	7.0227e+06	7.58886e+06	7.40662e+06	9.92874e+06	1.06734e+07	1.01359e+07	5.46734e+06	6.0517e+06	6.15339e+06	5.52535e+06	6.2436e+06	5.90271e+06	4.62215e+06	5.45011e+06	4.84094e+06	5.67061e+06	6.07275e+06	6.37173e+06	7.11588e+06	7.62931e+06	7.29823e+06	4.89395e+06	5.3131e+06	5.02077e+06	7.57704e+06	8.16625e+06	7.49235e+06	1.0438e+07	1.13595e+07	1.16385e+07	8.33669e+06	8.90397e+06	8.83358e+06	7.62877e+06	8.84152e+06	8.2252e+06	8.70296e+06	9.41595e+06	8.0203e+06	7.82524e+06	8.35324e+06	7.46562e+06	9.44355e+06	1.0005e+07	1.00817e+07	7.23716e+06
glucosamine	2.09853e+07	2.30806e+07	2.07411e+07	1.73546e+07	2.05461e+07	1.91496e+07	1.56924e+07	1.83539e+07	1.83185e+07	1.14983e+07	1.32188e+07	1.27423e+07	1.00197e+07	1.12027e+07	1.17655e+07	8.41415e+06	9.26434e+06	8.5879e+06	9.56579e+06	1.13202e+07	1.15518e+07	1.06821e+07	1.27556e+07	1.09661e+07	1.37589e+07	1.49443e+07	1.52925e+07	2.43153e+07	2.50239e+07	2.42622e+07	2.32447e+07	2.56222e+07	2.75206e+07	1.96992e+07	2.27437e+07	2.26317e+07	1.78062e+07	2.07283e+07	2.09843e+07	2.88927e+07	3.29608e+07	3.11339e+07	1.51829e+07	1.71554e+07	1.64828e+07	1.59609e+07	1.78815e+07	1.53255e+07	1.29191e+07
L-Serine	2.13078e+07	2.2118e+07	2.18723e+07	2.74606e+07	2.96144e+07	2.92071e+07	1.68717e+07	1.90548e+07	1.74557e+07	1.69347e+07	1.87755e+07	1.93782e+07	1.1041e+07	1.22433e+07	1.30108e+07	1.63079e+07	1.75538e+07	1.69521e+07	1.55329e+07	1.72094e+07	1.84811e+07	1.17725e+07	1.21886e+07	1.20502e+07	1.08916e+07	1.25686e+07	1.30057e+07	1.91763e+07	2.05873e+07	1.94558e+07	1.45812e+07	1.59859e+07	1.44956e+07	2.10582e+07	2.25138e+07	2.11542e+07	1.66867e+07	1.88165e+07	1.88822e+07	1.76387e+07	2.02859e+07	2.0173e+07	1.81298e+07	2.02508e+07	1.7447e+07	1.88054e+07	2.01332e+07	1.91974e+07	2.18042e+07
homovanillic acid_neg	5.10226e+06	5.33517e+06	5.19696e+06	2.26572e+06	2.6133e+06	2.07048e+06	5.48971e+06	6.19779e+06	5.55379e+06	1.7612e+07	1.79824e+07	1.78542e+07	6.59151e+06	7.26723e+06	6.18441e+06	4.72627e+06	5.83702e+06	5.41637e+06	8.5988e+06	9.22994e+06	8.44566e+06	5.68691e+06	6.12325e+06	6.20661e+06	2.64321e+06	3.29447e+06	3.28317e+06	3.53849e+06	4.04327e+06	3.21725e+06	3.10491e+06	3.95541e+06	3.41677e+06	7.06161e+06	7.24495e+06	7.03472e+06	6.55895e+06	6.92088e+06	6.63954e+06	9.62479e+06	1.01669e+07	9.09655e+06	6.39938e+06	7.00602e+06	5.97466e+06	4.13748e+06	5.29102e+06	4.68711e+06	4.1135e+06
D-Glyceraldehyde 3-phosphate_neg	2.1606e+06	2.41426e+06	2.26447e+06	1.16978e+06	1.53935e+06	1.21531e+06	4.83796e+06	5.49068e+06	5.93903e+06	2.851e+06	3.65728e+06	2.83727e+06	1.26012e+06	2.08829e+06	1.12123e+06	1.3926e+06	1.74785e+06	1.78411e+06	4.24914e+06	4.50197e+06	4.11544e+06	960725	1.39888e+06	1.36461e+06	878911	1.56759e+06	1.3119e+06	2.60888e+06	3.45169e+06	2.82512e+06	3.04854e+06	3.15876e+06	3.0409e+06	3.50694e+06	4.21244e+06	3.49041e+06	4.43181e+06	5.56165e+06	5.01541e+06	1.41145e+06	2.05921e+06	1.38158e+06	3.08015e+06	3.30134e+06	3.00155e+06	1.66888e+06	2.45463e+06	2.55023e+06	3.08702e+06
L-Homocysteic acid	7.94741e+06	9.2848e+06	8.40734e+06	1.07198e+07	1.21621e+07	1.30406e+07	1.16511e+07	1.27669e+07	1.37437e+07	8.42491e+06	9.55195e+06	8.69047e+06	6.71896e+06	7.57646e+06	7.96812e+06	7.37195e+06	8.65444e+06	6.30521e+06	6.76509e+06	8.20077e+06	7.30221e+06	8.19169e+06	9.02719e+06	9.75236e+06	4.25698e+06	5.71066e+06	5.976e+06	1.05265e+07	1.20888e+07	1.12683e+07	1.06618e+07	1.25072e+07	1.09835e+07	1.49891e+07	1.69195e+07	1.65186e+07	9.54564e+06	1.06773e+07	8.76642e+06	1.72795e+07	1.89916e+07	1.87223e+07	8.53448e+06	1.01271e+07	8.65171e+06	1.13742e+07	1.21092e+07	1.12859e+07	8.67354e+06
Phosphorylcholine	7.55063e+08	7.81243e+08	7.81795e+08	4.5744e+08	5.15199e+08	4.82603e+08	6.35158e+08	6.71628e+08	6.03408e+08	5.7563e+08	5.99719e+08	5.77557e+08	5.94607e+08	5.95674e+08	5.94072e+08	5.46107e+08	6.01345e+08	5.80228e+08	7.42334e+08	7.86893e+08	7.81555e+08	7.69567e+08	7.7355e+08	7.65774e+08	6.74853e+08	6.98714e+08	7.1531e+08	7.68881e+08	8.029e+08	7.59553e+08	5.24957e+08	5.66756e+08	5.69034e+08	5.58723e+08	6.23319e+08	5.821e+08	6.38444e+08	6.67494e+08	6.3997e+08	7.43755e+08	7.47511e+08	7.47377e+08	4.84517e+08	5.30818e+08	4.74553e+08	5.64875e+08	6.17526e+08	5.95165e+08	6.73881e+08
pyridoxine	3.58427e+07	3.80995e+07	3.58739e+07	1.98623e+07	2.19826e+07	2.24251e+07	4.20165e+07	4.359e+07	4.38572e+07	3.20202e+07	3.58676e+07	3.54248e+07	1.40927e+07	1.76791e+07	1.74418e+07	1.32869e+07	1.6815e+07	1.69847e+07	3.14661e+07	3.37741e+07	3.19323e+07	2.21871e+07	2.62661e+07	2.40822e+07	2.41341e+07	2.53677e+07	2.65982e+07	4.16188e+07	4.31299e+07	4.10078e+07	3.48614e+07	3.76871e+07	3.66077e+07	3.2768e+07	3.57747e+07	3.06696e+07	3.8987e+07	4.22372e+07	4.11316e+07	2.97289e+07	3.20585e+07	2.89197e+07	2.91656e+07	3.15605e+07	3.27114e+07	1.80693e+07	2.32981e+07	2.08107e+07	2.20283e+07
L-Alpha-aminobutyric acid	9.66484e+07	1.00152e+08	9.76576e+07	7.42122e+07	7.95502e+07	7.56214e+07	8.96515e+07	9.2698e+07	9.4381e+07	8.60727e+07	9.08007e+07	8.42491e+07	5.77021e+07	6.01906e+07	5.84e+07	4.9327e+07	5.71823e+07	5.44501e+07	8.68336e+07	9.01004e+07	8.49708e+07	4.84959e+07	5.34645e+07	5.63152e+07	5.08799e+07	5.55208e+07	5.43258e+07	8.96394e+07	9.45573e+07	9.0077e+07	7.96574e+07	8.64879e+07	8.08188e+07	8.1981e+07	8.6631e+07	8.83423e+07	8.58033e+07	8.96069e+07	8.61398e+07	8.49819e+07	8.98444e+07	8.99666e+07	9.03359e+07	9.16491e+07	9.1058e+07	6.66642e+07	7.00896e+07	6.99849e+07	9.76181e+07
Orotic acid_neg	2.02317e+07	2.04547e+07	2.04667e+07	3.04419e+07	3.17549e+07	2.99924e+07	1.8963e+07	2.18349e+07	2.05962e+07	1.78718e+07	1.88597e+07	1.70661e+07	1.56046e+07	1.78644e+07	1.53461e+07	1.18028e+07	1.47018e+07	1.36033e+07	2.00834e+07	2.09687e+07	2.11473e+07	1.20191e+07	1.3442e+07	1.27118e+07	1.63562e+07	1.67407e+07	1.6809e+07	2.01761e+07	2.19232e+07	2.01408e+07	1.69016e+07	1.86819e+07	1.7109e+07	1.74537e+07	1.97416e+07	1.97173e+07	1.89396e+07	2.1067e+07	2.09994e+07	1.85513e+07	1.885e+07	1.88734e+07	1.75809e+07	2.03221e+07	1.91776e+07	1.60811e+07	1.63772e+07	1.60297e+07	1.55157e+07
choline	5.26439e+08	5.60104e+08	5.28464e+08	3.10948e+08	3.31367e+08	3.39467e+08	4.34881e+08	4.75163e+08	4.50967e+08	4.65796e+08	4.75572e+08	4.61506e+08	2.90256e+08	3.20383e+08	2.96918e+08	3.22252e+08	3.53887e+08	3.16746e+08	5.14338e+08	5.34345e+08	5.28995e+08	2.88803e+08	3.35378e+08	3.14051e+08	2.97325e+08	3.25938e+08	3.28478e+08	5.16147e+08	5.50136e+08	5.18553e+08	4.90073e+08	4.95927e+08	4.95827e+08	4.71199e+08	4.84653e+08	4.76872e+08	4.84463e+08	5.22551e+08	4.98444e+08	5.15867e+08	5.46535e+08	5.26176e+08	5.17694e+08	5.55434e+08	5.49464e+08	3.54123e+08	3.92926e+08	3.66382e+08	4.92971e+08
L-Threonine	4.13245e+07	4.33144e+07	4.39175e+07	6.56768e+07	6.75113e+07	6.72544e+07	4.32872e+07	4.68048e+07	4.19425e+07	5.06753e+07	5.11464e+07	5.08118e+07	3.29665e+07	3.76199e+07	3.89368e+07	5.06702e+07	5.33239e+07	5.49105e+07	4.61264e+07	4.99772e+07	4.44491e+07	3.10213e+07	3.35627e+07	3.03397e+07	3.91432e+07	4.09727e+07	3.76047e+07	4.55878e+07	4.92822e+07	4.51546e+07	4.27049e+07	4.51676e+07	4.18295e+07	5.53183e+07	5.88116e+07	5.22231e+07	5.49299e+07	5.78498e+07	5.55957e+07	6.28083e+07	6.4866e+07	6.1194e+07	4.15287e+07	4.71727e+07	4.26354e+07	5.23171e+07	5.62361e+07	4.96832e+07	4.27755e+07
purine	1.01633e+08	1.09914e+08	1.14208e+08	1.17461e+08	1.2562e+08	1.27664e+08	1.37066e+08	1.3867e+08	1.39952e+08	1.04415e+08	1.16616e+08	1.08787e+08	8.76215e+07	9.35414e+07	9.5771e+07	9.38894e+07	9.82637e+07	9.19115e+07	8.77547e+07	9.39269e+07	9.97141e+07	1.21626e+08	1.30526e+08	1.24218e+08	8.01167e+07	8.81517e+07	9.29681e+07	1.15291e+08	1.23858e+08	1.14685e+08	1.51688e+08	1.53017e+08	1.52347e+08	1.2084e+08	1.30824e+08	1.26441e+08	1.25523e+08	1.28357e+08	1.24059e+08	1.3059e+08	1.3885e+08	1.27414e+08	1.27354e+08	1.31905e+08	1.28563e+08	1.26091e+08	1.34269e+08	1.30359e+08	1.21076e+08
aspartate	1.80126e+07	1.91197e+07	1.7428e+07	1.3987e+07	1.5073e+07	1.49687e+07	1.61479e+07	1.73449e+07	1.76149e+07	1.18908e+07	1.24008e+07	1.21567e+07	1.09947e+07	1.12018e+07	1.13832e+07	9.57978e+06	1.075e+07	9.97817e+06	1.41917e+07	1.49926e+07	1.38617e+07	1.3122e+07	1.49233e+07	1.40638e+07	1.35429e+07	1.4036e+07	1.41958e+07	1.62432e+07	1.77269e+07	1.69307e+07	1.61096e+07	1.66185e+07	1.70262e+07	1.5598e+07	1.6442e+07	1.53802e+07	1.62993e+07	1.68614e+07	1.66464e+07	1.64751e+07	1.68495e+07	1.63701e+07	1.66052e+07	1.76353e+07	1.8286e+07	1.64022e+07	1.69344e+07	1.72614e+07	1.80352e+07
5'-Methylthioadenosine	5.03275e+06	7.26006e+06	7.22667e+06	7.241e+06	9.1424e+06	6.96338e+06	1.4726e+07	1.75126e+07	1.59956e+07	5.65492e+06	7.2084e+06	6.79451e+06	5.35379e+06	7.59437e+06	5.58285e+06	7.04837e+06	8.2113e+06	9.30858e+06	7.84949e+06	1.08795e+07	9.39709e+06	1.1702e+07	1.3743e+07	1.36111e+07	9.20673e+06	1.1005e+07	8.61222e+06	6.66787e+06	7.56472e+06	7.95168e+06	1.34548e+07	1.43184e+07	1.50529e+07	1.03178e+07	1.10881e+07	1.05584e+07	1.16264e+07	1.23651e+07	1.29998e+07	1.82937e+07	1.96844e+07	1.87978e+07	9.00405e+06	1.12356e+07	1.01017e+07	1.03124e+07	1.20829e+07	1.20873e+07	7.04826e+06
dimethylglycine	1.08295e+08	1.1206e+08	1.04992e+08	8.98393e+07	9.24078e+07	8.97814e+07	1.08691e+08	1.12705e+08	1.07548e+08	9.59557e+07	9.8875e+07	9.62385e+07	6.57103e+07	7.3032e+07	7.11383e+07	6.04298e+07	6.76215e+07	6.45701e+07	1.00845e+08	1.09177e+08	1.04282e+08	6.32533e+07	6.79986e+07	6.33156e+07	5.97613e+07	6.54248e+07	6.62549e+07	1.01788e+08	1.10515e+08	1.05791e+08	9.47205e+07	9.65597e+07	9.49781e+07	9.56892e+07	1.00153e+08	9.8501e+07	1.01296e+08	1.04898e+08	1.01087e+08	1.00074e+08	1.02325e+08	1.04234e+08	9.91247e+07	9.97855e+07	9.86701e+07	8.11505e+07	8.54201e+07	8.12227e+07	1.04562e+08
4-Hydroxybenzoic acid_neg	3.56326e+06	5.46722e+06	7.33029e+06	5.44188e+06	7.89296e+06	3.43061e+06	9.82159e+06	1.47192e+07	9.58683e+06	1.49e+07	1.70652e+07	1.31502e+07	4.02335e+07	4.21238e+07	4.22569e+07	1.12209e+06	3.81117e+06	6.10535e+06	1.25957e+07	1.58517e+07	1.01054e+07	7.17996e+06	1.25917e+07	1.11634e+07	2.87736e+07	3.07096e+07	3.05527e+07	3.03923e+06	6.84103e+06	7.81598e+06	1.20251e+07	1.6743e+07	1.6141e+07	7.88662e+06	1.06774e+07	8.42225e+06	2.30935e+07	2.96738e+07	2.70601e+07	9.69184e+06	1.46872e+07	1.53547e+07	5.00146e+06	9.52213e+06	9.72943e+06	4.24007e+06	9.98172e+06	8.65944e+06	8.86221e+06
Acetyllysine	4.83921e+07	5.16338e+07	4.75454e+07	6.12189e+07	6.21266e+07	6.12218e+07	6.87509e+07	7.25586e+07	7.05233e+07	5.0637e+07	5.46316e+07	5.10957e+07	4.91092e+07	5.28421e+07	5.1032e+07	6.79652e+07	6.92791e+07	6.98337e+07	5.23626e+07	5.39747e+07	5.38503e+07	5.24346e+07	5.56056e+07	5.11757e+07	4.89016e+07	5.3314e+07	5.07993e+07	6.02707e+07	6.26715e+07	5.85324e+07	6.20127e+07	6.53868e+07	6.32751e+07	6.34572e+07	6.58081e+07	6.23511e+07	6.63472e+07	6.93999e+07	6.50777e+07	5.57404e+07	6.01132e+07	5.81628e+07	4.77417e+07	5.09431e+07	4.76178e+07	5.9632e+07	6.17028e+07	6.14349e+07	6.00885e+07
taurine_neg	2.49745e+07	2.62946e+07	2.57192e+07	3.15503e+07	3.38591e+07	3.11625e+07	3.04491e+07	3.18248e+07	3.01473e+07	2.7199e+07	2.88614e+07	2.73371e+07	1.65466e+07	2.06857e+07	1.86193e+07	2.14822e+07	2.47423e+07	2.45643e+07	1.76039e+07	2.18371e+07	1.99936e+07	8.80906e+06	1.12173e+07	9.38724e+06	1.99835e+07	2.21005e+07	2.00005e+07	2.38997e+07	2.65232e+07	2.27283e+07	2.6926e+07	3.06732e+07	2.99156e+07	2.36904e+07	2.68316e+07	2.45978e+07	2.77834e+07	2.86958e+07	2.90259e+07	2.40971e+07	2.62751e+07	2.34604e+07	1.95189e+07	2.37614e+07	2.21287e+07	1.88469e+07	2.23642e+07	2.14458e+07	2.60947e+07
citric/Isocitric acid (2)_neg	4.2908e+08	4.75243e+08	4.59648e+08	3.5307e+08	3.84215e+08	3.53289e+08	2.52685e+08	2.9949e+08	2.86275e+08	2.68465e+08	3.0966e+08	3.02747e+08	1.81873e+08	1.93551e+08	1.79332e+08	2.40593e+08	2.74826e+08	2.4798e+08	2.65496e+08	2.68407e+08	2.63751e+08	2.97321e+08	3.35472e+08	3.12986e+08	2.81021e+08	3.09176e+08	2.81867e+08	3.06898e+08	3.27877e+08	3.08514e+08	3.37327e+08	3.38252e+08	3.36642e+08	3.09899e+08	3.4441e+08	3.07398e+08	3.3889e+08	3.71279e+08	3.51801e+08	3.41838e+08	3.56035e+08	3.47178e+08	2.93009e+08	3.17593e+08	3.42039e+08	3.23717e+08	3.50948e+08	3.48812e+08	3.13466e+08
IMP_neg	1.20031e+07	1.31042e+07	1.21116e+07	1.06687e+07	1.11144e+07	1.064e+07	6.87928e+06	8.46244e+06	7.7753e+06	5.31217e+06	6.54421e+06	6.28881e+06	3.54845e+06	4.71272e+06	3.82836e+06	4.39471e+06	4.67501e+06	4.76123e+06	5.07826e+06	6.03715e+06	6.07226e+06	3.90478e+06	4.71497e+06	4.97427e+06	5.38041e+06	6.30908e+06	6.65458e+06	9.65476e+06	1.0841e+07	1.02318e+07	6.96115e+06	8.07896e+06	8.04182e+06	1.09002e+07	1.19039e+07	1.05525e+07	5.93216e+06	7.15254e+06	6.4801e+06	9.7586e+06	1.04507e+07	1.03962e+07	6.61059e+06	7.8225e+06	6.85557e+06	4.71409e+06	6.35661e+06	5.54416e+06	5.8621e+06
Indole-3-carboxylic acid_neg	3.69528e+07	4.02348e+07	3.65213e+07	3.53125e+07	3.73802e+07	3.85315e+07	3.95708e+07	4.22328e+07	4.17044e+07	3.67565e+07	3.88841e+07	3.58236e+07	3.30366e+07	3.37421e+07	3.31013e+07	3.6117e+07	3.86396e+07	3.97323e+07	3.17324e+07	3.49576e+07	3.41753e+07	3.5737e+07	3.78621e+07	3.68017e+07	3.04461e+07	3.15719e+07	3.13469e+07	4.23445e+07	4.39182e+07	4.15009e+07	5.37571e+07	5.7335e+07	5.4798e+07	3.45604e+07	3.79307e+07	3.66966e+07	4.48062e+07	4.88265e+07	4.73431e+07	3.28376e+07	3.48181e+07	3.43214e+07	3.65028e+07	3.85329e+07	3.79747e+07	3.63367e+07	3.76052e+07	3.51221e+07	4.8202e+07
Fumaric + maleic acid_neg	5.01166e+07	5.33154e+07	5.29291e+07	5.60805e+07	5.81375e+07	5.62095e+07	5.05235e+07	5.11417e+07	5.05679e+07	4.96611e+07	5.12415e+07	5.17523e+07	4.3566e+07	4.91982e+07	4.68066e+07	4.78367e+07	5.12623e+07	4.74982e+07	4.41901e+07	4.74305e+07	4.81273e+07	4.51965e+07	4.62924e+07	4.61815e+07	4.24912e+07	4.55343e+07	4.12004e+07	4.91295e+07	5.28327e+07	5.12235e+07	7.03795e+07	7.34097e+07	7.11533e+07	4.28392e+07	4.49062e+07	4.6132e+07	6.52676e+07	6.85207e+07	6.51389e+07	4.54314e+07	5.02019e+07	4.65171e+07	4.63679e+07	5.2021e+07	4.98572e+07	4.68889e+07	5.02277e+07	4.47266e+07	6.7764e+07
L-Tyrosine	3.5231e+08	3.54842e+08	3.52976e+08	4.00887e+08	4.31036e+08	3.93916e+08	4.45444e+08	4.79845e+08	4.74995e+08	3.78626e+08	4.14682e+08	4.25247e+08	3.27789e+08	3.60057e+08	3.38164e+08	3.14267e+08	3.3944e+08	3.31312e+08	2.98282e+08	3.21221e+08	3.06703e+08	3.62405e+08	4.02154e+08	3.93343e+08	2.86729e+08	3.30057e+08	3.25921e+08	3.93344e+08	4.29725e+08	4.00333e+08	4.03485e+08	4.32461e+08	4.20604e+08	5.27412e+08	5.68307e+08	5.22769e+08	3.77782e+08	4.19391e+08	3.77225e+08	5.56621e+08	5.84292e+08	5.57324e+08	3.53227e+08	3.78936e+08	3.33949e+08	3.93453e+08	4.17169e+08	4.04142e+08	3.89204e+08
putrescine	2.45336e+07	2.56462e+07	2.43344e+07	1.90216e+07	1.95368e+07	1.97548e+07	2.30964e+07	2.40579e+07	2.45823e+07	1.93401e+07	2.21515e+07	2.13435e+07	1.59067e+07	1.82107e+07	1.57458e+07	1.61649e+07	1.87027e+07	1.78241e+07	1.8256e+07	1.90245e+07	1.83416e+07	1.31271e+07	1.5457e+07	1.61991e+07	2.05673e+07	2.19498e+07	1.92558e+07	2.24234e+07	2.60455e+07	2.44848e+07	2.60058e+07	2.61689e+07	2.58772e+07	2.48251e+07	2.69637e+07	2.56743e+07	2.6884e+07	2.82873e+07	2.74471e+07	2.30363e+07	2.55656e+07	2.37686e+07	2.36969e+07	2.49636e+07	2.35328e+07	2.21032e+07	2.28831e+07	2.36135e+07	2.46019e+07
Aminoadipic acid	1.56784e+07	1.80447e+07	1.64976e+07	1.87249e+07	2.10994e+07	1.95894e+07	1.76064e+07	1.8946e+07	1.7886e+07	1.60565e+07	1.75834e+07	1.66542e+07	1.66659e+07	1.83562e+07	1.64972e+07	1.60999e+07	1.75652e+07	1.62604e+07	1.64049e+07	1.79246e+07	1.74685e+07	1.8294e+07	1.97441e+07	1.77532e+07	1.50722e+07	1.56356e+07	1.51428e+07	1.75687e+07	1.90989e+07	1.81243e+07	2.79511e+07	2.91979e+07	2.71329e+07	1.5549e+07	1.60745e+07	1.55297e+07	2.44238e+07	2.66424e+07	2.51279e+07	1.59811e+07	1.72673e+07	1.55095e+07	1.84737e+07	1.9344e+07	1.80132e+07	1.5969e+07	1.81157e+07	1.71462e+07	2.25903e+07
p-coumaric acid	3.2401e+08	3.29664e+08	3.34473e+08	3.699e+08	3.90819e+08	3.7768e+08	4.14787e+08	4.42335e+08	4.11974e+08	3.36166e+08	3.65667e+08	3.85665e+08	2.55649e+08	2.92935e+08	2.88768e+08	2.91816e+08	3.11848e+08	2.77064e+08	2.61049e+08	3.10549e+08	2.80593e+08	3.36555e+08	3.70295e+08	3.43673e+08	2.35619e+08	2.65012e+08	2.67676e+08	3.67034e+08	3.8404e+08	3.58487e+08	3.74222e+08	4.0317e+08	3.7512e+08	4.73669e+08	4.99362e+08	4.9444e+08	3.48969e+08	3.5776e+08	3.64564e+08	4.87402e+08	5.19871e+08	5.33243e+08	3.0422e+08	3.37703e+08	3.29489e+08	3.7323e+08	3.95046e+08	3.53812e+08	3.71074e+08
adenine	1.76429e+08	1.90557e+08	1.8135e+08	1.91109e+08	2.07341e+08	2.13032e+08	2.28575e+08	2.36949e+08	2.39698e+08	2.01531e+08	2.05159e+08	1.98577e+08	1.42533e+08	1.69064e+08	1.60467e+08	1.4939e+08	1.66274e+08	1.70537e+08	1.44987e+08	1.719e+08	1.5585e+08	1.7876e+08	1.99221e+08	1.9157e+08	1.52117e+08	1.704e+08	1.48638e+08	1.95784e+08	2.05999e+08	2.08316e+08	2.02087e+08	2.19975e+08	1.98136e+08	2.54951e+08	2.67774e+08	2.72469e+08	1.89694e+08	1.98423e+08	1.85109e+08	2.79636e+08	2.97537e+08	2.81052e+08	1.70871e+08	1.84392e+08	1.647e+08	1.91688e+08	2.13215e+08	2.06857e+08	2.0013e+08
Alpha-ketoisovaleric acid_neg	4.44218e+07	4.71189e+07	4.39116e+07	4.90353e+07	5.27877e+07	5.12016e+07	5.08536e+07	5.51595e+07	5.13545e+07	4.33643e+07	4.90181e+07	4.57543e+07	3.82381e+07	4.2369e+07	4.32628e+07	4.4395e+07	4.9989e+07	4.71603e+07	3.95468e+07	4.54453e+07	4.26298e+07	3.83322e+07	4.07281e+07	4.03644e+07	3.72501e+07	4.37678e+07	4.00276e+07	4.68879e+07	5.17698e+07	4.64547e+07	6.59785e+07	6.61107e+07	6.59556e+07	4.0552e+07	4.28371e+07	4.09094e+07	5.56907e+07	5.9796e+07	5.92941e+07	4.27127e+07	4.53485e+07	4.40996e+07	4.38612e+07	4.56851e+07	4.25105e+07	4.36944e+07	4.54377e+07	4.62673e+07	6.6258e+07
Methylcysteine	2.96641e+08	3.46185e+08	3.28704e+08	3.47172e+08	3.93396e+08	3.75426e+08	4.05718e+08	4.35095e+08	4.00872e+08	3.65317e+08	3.7428e+08	3.56572e+08	2.60124e+08	3.11089e+08	2.8743e+08	2.69042e+08	3.13031e+08	3.0106e+08	2.59448e+08	2.899e+08	2.97691e+08	3.21142e+08	3.69464e+08	3.50475e+08	2.56648e+08	2.82736e+08	3.06556e+08	3.62545e+08	3.71087e+08	3.64106e+08	3.55369e+08	4.06707e+08	3.82765e+08	4.69263e+08	4.95713e+08	4.84738e+08	3.52332e+08	3.66846e+08	3.42298e+08	4.85314e+08	5.20807e+08	5.19434e+08	3.13164e+08	3.38786e+08	3.07502e+08	3.69783e+08	3.72767e+08	3.75709e+08	3.66226e+08
3-hydroxybutyric acid_neg	7.90119e+07	9.26924e+07	8.57805e+07	8.82673e+07	9.55462e+07	8.39469e+07	4.09909e+07	4.63034e+07	3.59624e+07	2.89304e+07	3.53244e+07	2.83489e+07	7.01765e+07	7.71409e+07	7.45646e+07	2.11128e+07	3.26952e+07	3.09795e+07	4.81735e+07	5.95365e+07	3.77993e+07	1.54766e+07	2.98951e+07	2.94495e+07	3.16195e+07	3.81649e+07	3.22612e+07	6.04126e+07	7.11915e+07	5.7486e+07	1.79386e+07	2.58503e+07	1.78108e+07	2.35588e+07	2.60312e+07	2.66532e+07	3.56795e+07	5.86013e+07	4.72517e+07	1.04327e+07	2.25488e+07	5.32951e+06	6.57886e+07	7.32062e+07	5.98973e+07	5.91609e+07	6.55206e+07	5.97199e+07	1.42837e+08
2-Oxo-3-methyl-butyrate	6.76399e+07	6.97901e+07	6.60083e+07	7.39473e+07	7.74794e+07	8.05639e+07	7.9446e+07	8.24056e+07	8.42276e+07	6.39379e+07	6.9719e+07	6.90081e+07	6.30404e+07	6.78633e+07	7.19679e+07	6.75979e+07	7.0758e+07	6.80408e+07	7.38227e+07	7.54509e+07	7.69717e+07	5.63925e+07	6.15627e+07	6.5243e+07	5.07577e+07	5.52475e+07	5.38587e+07	6.78254e+07	7.59039e+07	7.42286e+07	7.01551e+07	7.55298e+07	7.34573e+07	6.679e+07	7.08635e+07	6.66382e+07	7.58828e+07	8.18614e+07	8.11903e+07	7.2805e+07	8.0267e+07	7.64338e+07	7.9371e+07	8.15554e+07	8.16093e+07	8.56952e+07	8.81166e+07	9.01346e+07	8.29941e+07
Asymm + symm dimethylarginine	1.56492e+08	1.6604e+08	1.69154e+08	1.38154e+08	1.44996e+08	1.3596e+08	7.2187e+07	7.58658e+07	7.53459e+07	1.16143e+08	1.19664e+08	1.1743e+08	9.61339e+07	1.02743e+08	9.77244e+07	1.04731e+08	1.17412e+08	1.09381e+08	8.4051e+07	9.68915e+07	9.3801e+07	8.23013e+07	8.43058e+07	8.54052e+07	7.45934e+07	8.75071e+07	8.86544e+07	9.39468e+07	1.05959e+08	9.01793e+07	1.03765e+08	1.09814e+08	1.1054e+08	1.00973e+08	1.08022e+08	9.44425e+07	1.1979e+08	1.23298e+08	1.24157e+08	1.05935e+08	1.06821e+08	1.06828e+08	1.25332e+08	1.31519e+08	1.29676e+08	1.15009e+08	1.23873e+08	1.10898e+08	9.93863e+07
L-Leucine + L-isoleucine	2.13596e+09	2.33403e+09	2.24014e+09	2.50207e+09	2.63149e+09	2.62398e+09	2.22651e+09	2.32877e+09	2.32421e+09	2.14334e+09	2.18071e+09	2.14412e+09	2.12383e+09	2.27068e+09	2.14634e+09	1.82043e+09	1.86609e+09	1.86162e+09	1.87894e+09	1.88865e+09	1.8736e+09	2.03315e+09	2.12061e+09	1.94668e+09	1.91965e+09	2.04282e+09	1.954e+09	2.43978e+09	2.53958e+09	2.39366e+09	2.18868e+09	2.33666e+09	2.18361e+09	2.33777e+09	2.3498e+09	2.36117e+09	2.57465e+09	2.69808e+09	2.55419e+09	2.5228e+09	2.608e+09	2.55931e+09	2.28772e+09	2.2983e+09	2.27778e+09	2.1621e+09	2.27022e+09	2.22474e+09	2.80215e+09
uridine_neg	1.11111e+07	1.18784e+07	1.03968e+07	7.39461e+06	8.5383e+06	7.0043e+06	4.9905e+06	6.34434e+06	5.74051e+06	1.09915e+07	1.18971e+07	1.26411e+07	7.39935e+06	8.19241e+06	8.42791e+06	8.26093e+06	9.08318e+06	8.89603e+06	8.20389e+06	9.47525e+06	9.02979e+06	9.88766e+06	1.08679e+07	1.14083e+07	6.85884e+06	7.55937e+06	8.17314e+06	1.38076e+07	1.43539e+07	1.33204e+07	8.96825e+06	9.21626e+06	9.36178e+06	1.0737e+07	1.11681e+07	1.13908e+07	1.09196e+07	1.1058e+07	1.11885e+07	9.26294e+06	9.8363e+06	1.01465e+07	9.65553e+06	1.06005e+07	9.12648e+06	7.59629e+06	8.63415e+06	7.38634e+06	1.26291e+07
2-hydroxybutanoic acid_neg	1.49525e+07	1.67064e+07	1.43037e+07	1.08123e+07	1.31528e+07	1.07984e+07	1.37978e+07	1.66148e+07	1.48584e+07	5.89015e+06	7.40306e+06	5.50052e+06	9.50047e+06	1.04211e+07	9.50579e+06	6.21175e+06	6.8621e+06	5.65245e+06	8.31649e+06	9.0023e+06	8.83529e+06	6.7586e+06	8.32849e+06	7.29908e+06	3.5987e+06	6.17169e+06	3.69412e+06	1.40734e+07	1.57798e+07	1.4064e+07	6.18169e+06	8.04008e+06	5.70029e+06	1.14081e+07	1.30624e+07	1.10092e+07	1.28632e+07	1.52359e+07	1.30811e+07	1.0387e+07	1.18764e+07	1.17936e+07	9.78405e+06	1.11641e+07	8.48018e+06	7.58559e+06	1.01791e+07	9.09707e+06	2.11098e+07
asparagine	5.66637e+07	7.28841e+07	6.87351e+07	7.83947e+07	7.98274e+07	8.03554e+07	3.79229e+07	4.61828e+07	3.52682e+07	2.17943e+07	4.14639e+07	2.54787e+07	7.81715e+07	9.07002e+07	8.16051e+07	7.56832e+07	9.14002e+07	8.0082e+07	1.55304e+07	3.01685e+07	1.09374e+07	9.76853e+07	1.09105e+08	1.03434e+08	1.08048e+08	1.16643e+08	1.1971e+08	1.55582e+07	2.18425e+07	2.7332e+07	6.50708e+07	8.30149e+07	8.08367e+07	7.40799e+07	9.50137e+07	8.00615e+07	7.45215e+07	7.62806e+07	7.42057e+07	6.29543e+07	7.40291e+07	8.35947e+07	3.23795e+07	3.8339e+07	4.29255e+07	6.38681e+07	7.88547e+07	6.71111e+07	7.48115e+07
Glyceric acid_neg	2.38675e+06	2.92301e+06	2.71155e+06	1.74252e+06	2.08593e+06	1.99542e+06	5.42465e+06	5.83046e+06	5.45883e+06	3.05733e+06	3.62103e+06	3.24077e+06	913251	1.56355e+06	1.6622e+06	3.32167e+06	3.85583e+06	4.15554e+06	1.7529e+06	2.43542e+06	1.93704e+06	3.15904e+06	3.32093e+06	3.31428e+06	2.39678e+06	2.82133e+06	2.0458e+06	3.61534e+06	4.13735e+06	3.69865e+06	4.29737e+06	4.82614e+06	3.94328e+06	5.18975e+06	5.88206e+06	5.60607e+06	2.53078e+06	3.3416e+06	2.87315e+06	1.70916e+06	2.31502e+06	2.19586e+06	1.98923e+06	2.20964e+06	2.3525e+06	4.13157e+06	4.20286e+06	4.09123e+06	2.12041e+06
dUMP_neg	1.2759e+07	1.41308e+07	1.30402e+07	4.9317e+06	5.82547e+06	4.28418e+06	3.07509e+06	4.08411e+06	4.46901e+06	5.40597e+06	5.97119e+06	5.69538e+06	6.42484e+06	7.2242e+06	7.21631e+06	5.53886e+06	6.66658e+06	6.25091e+06	5.09773e+06	6.17352e+06	6.41744e+06	6.40729e+06	7.4594e+06	6.88968e+06	9.38561e+06	9.75873e+06	9.13582e+06	7.16309e+06	8.42382e+06	7.58614e+06	7.78117e+06	8.40044e+06	7.76898e+06	8.12342e+06	8.63629e+06	7.65919e+06	5.28916e+06	6.7234e+06	5.63793e+06	3.40288e+06	4.19771e+06	3.6651e+06	4.48339e+06	5.65211e+06	5.64859e+06	6.16579e+06	7.80105e+06	7.23114e+06	5.69111e+06
ornithine	1.52626e+08	1.68925e+08	1.5636e+08	1.78652e+08	1.87593e+08	1.80627e+08	1.04782e+07	2.02169e+07	2.3349e+07	1.70731e+07	2.27545e+07	2.1308e+07	1.0661e+07	1.89596e+07	2.25962e+07	1.26006e+08	1.34344e+08	1.24996e+08	1.16337e+07	2.60109e+07	1.44547e+07	1.43894e+08	1.56766e+08	1.5935e+08	7.01051e+07	8.45693e+07	7.10872e+07	5.86757e+06	1.66672e+07	2.19054e+07	1.2149e+07	2.21998e+07	1.60337e+07	1.69539e+07	2.62555e+07	1.24723e+07	1.8266e+07	2.32309e+07	2.65421e+07	2.14903e+07	3.23658e+07	1.53281e+07	1.06792e+07	2.40809e+07	1.95468e+07	8.9252e+06	1.82994e+07	2.00607e+07	1.49087e+08
7-methylguanosine	3.79046e+07	4.41048e+07	4.1787e+07	4.91021e+07	5.18072e+07	4.88302e+07	4.80331e+07	5.49532e+07	5.04839e+07	3.85789e+07	4.23362e+07	3.93415e+07	3.7646e+07	3.91043e+07	3.71129e+07	3.45956e+07	3.61787e+07	3.69357e+07	2.90932e+07	3.37936e+07	2.689e+07	3.97456e+07	4.33922e+07	4.63104e+07	3.6267e+07	4.12368e+07	4.26291e+07	4.16327e+07	4.65365e+07	4.55924e+07	5.40606e+07	5.46119e+07	5.42999e+07	4.82687e+07	4.94689e+07	4.92932e+07	5.45563e+07	5.79219e+07	5.22741e+07	4.48606e+07	4.55857e+07	4.56891e+07	2.30336e+07	2.85131e+07	2.80294e+07	6.12843e+07	6.55232e+07	6.50973e+07	4.32025e+07
Uric acid_neg	7.56093e+08	7.90746e+08	8.01129e+08	5.0161e+08	5.39134e+08	5.76288e+08	9.26534e+08	9.97252e+08	9.45567e+08	6.60706e+08	6.76627e+08	6.73653e+08	5.67418e+08	6.31223e+08	6.25291e+08	4.17766e+08	4.62545e+08	4.78512e+08	6.63956e+08	6.78004e+08	6.77678e+08	5.79928e+08	6.24589e+08	5.51975e+08	6.16135e+08	6.84073e+08	6.30734e+08	7.41192e+08	8.00864e+08	7.75867e+08	6.35313e+08	7.26356e+08	6.70812e+08	6.82687e+08	7.14553e+08	6.92907e+08	7.61163e+08	8.30994e+08	7.72941e+08	5.65696e+08	6.39061e+08	6.1481e+08	6.80484e+08	7.46543e+08	6.6573e+08	5.67425e+08	5.92485e+08	5.64624e+08	6.61372e+08
Indoleacrylic acid_neg	3.24649e+07	3.59279e+07	3.27096e+07	4.82427e+07	5.25829e+07	4.64009e+07	2.68305e+07	2.89452e+07	2.68812e+07	2.14825e+07	2.1794e+07	2.14183e+07	1.07716e+07	1.43901e+07	9.55072e+06	7.47086e+06	1.04642e+07	1.32651e+07	1.16979e+07	1.58105e+07	1.11864e+07	7.22463e+06	1.16297e+07	1.02849e+07	1.48654e+07	1.72894e+07	1.54638e+07	2.5018e+07	3.04705e+07	2.49977e+07	2.0404e+07	2.29078e+07	2.16561e+07	2.93742e+07	3.30342e+07	3.04476e+07	1.54793e+07	1.78705e+07	1.31824e+07	2.55629e+07	2.9348e+07	2.64772e+07	1.602e+07	1.81642e+07	1.79918e+07	1.70092e+07	2.20837e+07	1.83811e+07	2.18507e+07
L-Methionine	9.99982e+07	1.22314e+08	1.2536e+08	1.09395e+08	1.23884e+08	1.13076e+08	2.65865e+08	2.96642e+08	2.80235e+08	1.91543e+08	2.13366e+08	1.97256e+08	1.61896e+08	1.82891e+08	1.83419e+08	1.2136e+08	1.253e+08	1.20908e+08	1.59193e+08	1.79211e+08	1.56612e+08	9.63e+07	1.13336e+08	1.04433e+08	1.43732e+08	1.54847e+08	1.60058e+08	2.0609e+08	2.14441e+08	2.15354e+08	2.1443e+08	2.322e+08	2.00905e+08	2.69802e+08	2.91245e+08	2.70169e+08	1.83208e+08	2.05385e+08	1.89202e+08	2.84653e+08	2.98842e+08	2.71629e+08	1.71799e+08	1.9709e+08	1.95138e+08	2.04046e+08	2.21909e+08	2.34962e+08	1.35651e+08
Citraconic acid_neg	4.22341e+07	4.28576e+07	4.24346e+07	3.31712e+07	3.573e+07	3.07946e+07	2.60405e+07	2.75371e+07	2.47326e+07	2.90703e+07	2.99467e+07	3.07078e+07	1.45505e+07	1.82234e+07	1.82272e+07	1.76559e+07	2.09579e+07	2.16526e+07	2.13364e+07	2.39841e+07	2.30228e+07	2.84353e+07	3.13057e+07	2.66669e+07	2.5573e+07	2.80662e+07	2.81718e+07	2.67684e+07	2.89468e+07	2.62511e+07	3.1022e+07	3.201e+07	3.1812e+07	3.08299e+07	3.20096e+07	3.12066e+07	3.39826e+07	3.52321e+07	3.30401e+07	3.2862e+07	3.52562e+07	3.36138e+07	2.6363e+07	2.96266e+07	2.58033e+07	3.2917e+07	3.37671e+07	3.34902e+07	2.7883e+07
trimethylamine oxide	4.11863e+07	5.34466e+07	3.91904e+07	7.59666e+06	1.45215e+07	5.32152e+06	9.00514e+07	1.01315e+08	9.92397e+07	6.89362e+07	7.8581e+07	6.74858e+07	2.93991e+07	3.89598e+07	3.87485e+07	9.25279e+07	1.03005e+08	9.91309e+07	4.87101e+07	6.18905e+07	4.86246e+07	2.63019e+07	3.50555e+07	1.75506e+07	4.37102e+07	5.56003e+07	5.03729e+07	4.04997e+07	5.55608e+07	4.41002e+07	2.72537e+07	3.95847e+07	2.7152e+07	3.77449e+07	4.63663e+07	4.8294e+07	9.3723e+07	1.07069e+08	1.01964e+08	3.52365e+07	4.21669e+07	4.05803e+07	4.6869e+07	5.8801e+07	5.56162e+07	6.43035e+07	7.69488e+07	7.76711e+07	1.60554e+07
N-Acetyl-L-alanine_neg	8.50696e+06	9.6019e+06	8.95765e+06	6.86619e+06	7.47786e+06	7.3544e+06	1.09532e+07	1.15697e+07	1.06158e+07	7.4417e+06	8.2472e+06	7.66648e+06	6.95088e+06	7.3921e+06	7.19242e+06	5.37972e+06	6.11499e+06	5.94217e+06	8.70739e+06	9.38206e+06	9.40708e+06	5.10189e+06	6.06374e+06	5.69432e+06	5.04605e+06	6.03055e+06	5.27189e+06	8.08201e+06	8.82495e+06	8.07069e+06	7.6487e+06	7.8217e+06	7.54469e+06	5.21183e+06	5.79613e+06	6.0529e+06	1.04998e+07	1.1046e+07	9.9581e+06	8.81329e+06	9.47712e+06	9.306e+06	7.44464e+06	7.92915e+06	7.93803e+06	7.64552e+06	8.51878e+06	8.04431e+06	8.40971e+06
Allantoic acid_neg	5.71441e+06	6.93665e+06	6.2362e+06	5.91902e+06	6.42431e+06	6.19969e+06	6.57133e+06	6.99742e+06	6.99196e+06	1.12923e+07	1.16331e+07	1.14285e+07	8.58562e+06	9.35324e+06	8.50594e+06	7.39895e+06	8.1756e+06	8.51927e+06	8.86537e+06	9.05503e+06	8.95816e+06	4.85055e+06	5.67757e+06	5.52713e+06	6.60051e+06	7.52845e+06	7.57241e+06	9.28293e+06	9.57336e+06	9.67515e+06	1.01293e+07	1.03818e+07	1.05683e+07	6.51383e+06	7.39866e+06	6.44776e+06	1.03103e+07	1.11371e+07	1.06231e+07	7.6318e+06	8.35374e+06	9.06308e+06	7.98106e+06	9.03159e+06	8.45459e+06	8.29065e+06	8.73317e+06	8.63581e+06	8.95734e+06
pantothenic acid	1.30011e+07	1.51938e+07	1.50856e+07	1.27565e+07	1.65464e+07	1.51218e+07	1.96842e+07	2.20549e+07	1.96465e+07	8.44644e+06	1.1917e+07	9.47391e+06	6.5738e+06	7.41889e+06	6.09647e+06	9.81372e+06	1.25857e+07	1.16324e+07	1.04606e+07	1.3734e+07	1.12353e+07	2.03625e+07	2.1577e+07	1.99654e+07	1.23773e+07	1.37939e+07	1.21802e+07	1.39454e+07	1.57489e+07	1.48969e+07	2.86168e+07	2.92894e+07	2.79647e+07	2.14773e+07	2.26005e+07	2.08204e+07	2.12205e+07	2.37111e+07	2.00396e+07	1.19512e+07	1.44372e+07	1.58026e+07	1.51809e+07	1.69996e+07	1.40028e+07	1.98391e+07	2.19918e+07	2.03713e+07	1.44706e+07
Tetradecanedioic acid_neg	1.08861e+08	1.2078e+08	1.06208e+08	7.0927e+07	7.83497e+07	6.91717e+07	9.38937e+07	1.01199e+08	1.00786e+08	7.15727e+07	7.94229e+07	8.45399e+07	8.39465e+07	9.21844e+07	9.26921e+07	5.25289e+07	6.64486e+07	6.33175e+07	9.83688e+07	1.07535e+08	9.25899e+07	8.23641e+07	8.90147e+07	8.96993e+07	5.93836e+07	6.5172e+07	6.48651e+07	1.14022e+08	1.28856e+08	1.15201e+08	9.38657e+07	1.10409e+08	1.01389e+08	8.29725e+07	9.90954e+07	9.2259e+07	7.58438e+07	8.47297e+07	8.64056e+07	8.99778e+07	9.72019e+07	8.80453e+07	4.88951e+07	5.73238e+07	6.48722e+07	9.01948e+07	9.94767e+07	8.28596e+07	8.39193e+07
Phenyllactic acid (2)_neg	3.6088e+07	3.8802e+07	3.98637e+07	3.07564e+07	3.56386e+07	3.06123e+07	6.16144e+06	9.76516e+06	6.9798e+06	3.03708e+07	3.64719e+07	3.38613e+07	5.99475e+07	6.33477e+07	5.79149e+07	1.32043e+06	5.26599e+06	7.70045e+06	4.73314e+07	4.97467e+07	5.18751e+07	5.9524e+07	6.17778e+07	6.09495e+07	3.56171e+07	4.17479e+07	4.1462e+07	4.60719e+07	5.16877e+07	4.50356e+07	4.94206e+06	6.73949e+06	7.21602e+06	6.40295e+06	7.46117e+06	7.24547e+06	6.05938e+07	6.60375e+07	6.64351e+07	4.01316e+07	4.56256e+07	4.4473e+07	7.24015e+07	7.98236e+07	7.64282e+07	3.34142e+06	1.11218e+07	8.73367e+06	3.19417e+06
L-Glutamine (?)	7.03968e+07	7.94232e+07	7.46708e+07	7.30486e+07	8.02979e+07	8.20253e+07	2.82863e+07	3.48309e+07	3.19499e+07	2.31567e+07	3.01576e+07	2.95001e+07	2.52923e+07	3.00061e+07	3.26857e+07	2.4881e+07	2.83917e+07	2.82048e+07	2.61497e+07	3.4994e+07	2.64383e+07	3.11024e+07	3.74317e+07	2.69961e+07	3.18137e+07	3.71232e+07	2.99902e+07	3.04097e+07	3.85855e+07	3.21452e+07	3.19596e+07	3.91095e+07	2.96861e+07	3.40504e+07	3.89382e+07	4.29222e+07	3.26851e+07	4.00241e+07	3.60402e+07	1.79884e+07	2.51641e+07	1.49011e+07	2.75392e+07	3.74858e+07	3.10722e+07	2.94855e+07	3.82598e+07	3.63429e+07	3.53766e+07
hippuric acid_neg	1.51395e+08	1.59118e+08	1.65779e+08	9.53515e+07	1.10706e+08	8.74701e+07	5.50479e+07	7.62077e+07	7.199e+07	1.42229e+08	1.56451e+08	1.59788e+08	3.95046e+07	5.63764e+07	4.45752e+07	4.65274e+07	5.68549e+07	5.69366e+07	5.17695e+07	6.7319e+07	7.54678e+07	5.24087e+07	7.33364e+07	6.75858e+07	4.17886e+07	5.46014e+07	6.70176e+07	2.49148e+07	2.75592e+07	2.50693e+07	1.177e+08	1.4045e+08	1.23721e+08	7.49215e+07	8.72861e+07	7.15526e+07	7.06953e+07	7.83025e+07	8.40059e+07	4.31857e+07	4.89075e+07	4.77789e+07	2.8443e+07	4.38195e+07	2.09048e+07	8.80129e+07	9.92058e+07	1.07381e+08	1.92386e+07
hippuric acid	2.25611e+08	2.46459e+08	2.45735e+08	1.46851e+08	1.70574e+08	1.68532e+08	1.59926e+08	1.91117e+08	1.61323e+08	3.19188e+08	3.53378e+08	3.58626e+08	1.09062e+08	1.13303e+08	1.15665e+08	1.31303e+08	1.66505e+08	1.26835e+08	1.54817e+08	1.8791e+08	2.09789e+08	1.3952e+08	1.82306e+08	1.70787e+08	1.36105e+08	1.65189e+08	1.81903e+08	4.27193e+07	7.29061e+07	6.49234e+07	2.65907e+08	2.81105e+08	2.71659e+08	1.59999e+08	1.89059e+08	1.85098e+08	1.64615e+08	2.06148e+08	1.62428e+08	1.12606e+08	1.38252e+08	1.06743e+08	6.5552e+07	8.81326e+07	7.69177e+07	2.05656e+08	2.33537e+08	1.94315e+08	4.37112e+07
gluconic acid_neg	3.18019e+07	3.56235e+07	3.05428e+07	2.52189e+07	2.85443e+07	2.43268e+07	4.88064e+07	4.96975e+07	4.83672e+07	2.58134e+07	2.94898e+07	2.6749e+07	1.93293e+07	2.08631e+07	1.97417e+07	3.36278e+07	3.47312e+07	3.43982e+07	2.6015e+07	2.66722e+07	2.64396e+07	1.39264e+07	1.60358e+07	1.59213e+07	1.50526e+07	1.82046e+07	1.43526e+07	2.2065e+07	2.60835e+07	2.12427e+07	2.33768e+07	2.95661e+07	2.74224e+07	1.06975e+07	1.31301e+07	1.50443e+07	3.41497e+07	3.54425e+07	3.31933e+07	2.96903e+07	3.32597e+07	3.25047e+07	2.54709e+07	2.59081e+07	2.57332e+07	1.83878e+07	2.38187e+07	2.10626e+07	2.53999e+07
Pantothenic acid_neg	1.23621e+07	1.27989e+07	1.23671e+07	1.26864e+07	1.44389e+07	1.29494e+07	1.6341e+07	1.82346e+07	1.69806e+07	1.00311e+07	1.12424e+07	9.71312e+06	7.7444e+06	9.45732e+06	9.77325e+06	1.04364e+07	1.21112e+07	9.57446e+06	1.15446e+07	1.25661e+07	1.29732e+07	1.57125e+07	1.75966e+07	1.58628e+07	1.58932e+07	1.73663e+07	1.44558e+07	1.25501e+07	1.30894e+07	1.33776e+07	1.66612e+07	1.83805e+07	1.83803e+07	1.22217e+07	1.27763e+07	1.26358e+07	1.51263e+07	1.69928e+07	1.68875e+07	9.73894e+06	1.09339e+07	1.00026e+07	1.34104e+07	1.53447e+07	1.39525e+07	1.68027e+07	1.83424e+07	1.63444e+07	1.06253e+07
carnitine	1.02404e+09	1.08012e+09	1.10721e+09	8.95899e+08	9.11219e+08	9.20936e+08	1.18566e+09	1.29032e+09	1.23198e+09	7.75248e+08	8.89245e+08	8.37534e+08	6.99651e+08	7.84535e+08	6.98862e+08	8.2308e+08	8.88776e+08	9.15196e+08	7.24939e+08	8.17507e+08	7.96723e+08	7.59393e+08	8.014e+08	7.43661e+08	8.26578e+08	9.30119e+08	8.62488e+08	7.63636e+08	8.03409e+08	7.52798e+08	9.26997e+08	9.80072e+08	9.84814e+08	7.72642e+08	8.61514e+08	8.17319e+08	8.30769e+08	8.9209e+08	9.06787e+08	8.62072e+08	9.16905e+08	8.56364e+08	8.44456e+08	9.10419e+08	8.17194e+08	8.30956e+08	8.74752e+08	9.07608e+08	7.77902e+08
Ureidosuccinic acid_neg	5.29818e+06	5.57859e+06	5.85667e+06	5.20502e+06	5.55721e+06	5.63856e+06	6.89759e+06	6.99016e+06	7.04987e+06	9.94644e+06	1.05736e+07	1.0177e+07	7.87403e+06	8.48306e+06	7.56981e+06	8.36218e+06	8.54712e+06	8.30159e+06	9.17984e+06	1.00455e+07	9.34748e+06	4.53806e+06	5.32326e+06	4.79714e+06	6.47201e+06	7.6746e+06	7.20822e+06	9.09602e+06	9.85819e+06	9.23663e+06	1.04633e+07	1.14248e+07	1.10431e+07	6.01839e+06	6.60505e+06	6.74379e+06	1.05411e+07	1.08233e+07	1.07165e+07	7.15052e+06	8.20755e+06	7.67056e+06	7.29043e+06	7.99092e+06	8.25857e+06	7.14698e+06	8.06473e+06	7.57803e+06	1.00411e+07
citrulline	8.83175e+07	9.29217e+07	8.96911e+07	8.72618e+07	9.34078e+07	8.53753e+07	6.88609e+07	7.45659e+07	6.68397e+07	9.95698e+07	1.08551e+08	1.02132e+08	8.30939e+07	9.05267e+07	8.71995e+07	8.94004e+07	9.72501e+07	9.35369e+07	7.83424e+07	8.62581e+07	8.67625e+07	5.48577e+07	6.1119e+07	6.3051e+07	6.91517e+07	7.3724e+07	6.79177e+07	9.13387e+07	9.83506e+07	8.87872e+07	1.02866e+08	1.08097e+08	1.00124e+08	8.03525e+07	8.71646e+07	7.77368e+07	1.11373e+08	1.15815e+08	1.16301e+08	9.64255e+07	9.80674e+07	9.90559e+07	8.11369e+07	8.62045e+07	8.17852e+07	8.49227e+07	8.93032e+07	8.10209e+07	9.6695e+07
glucose_neg	7.46412e+06	8.14642e+06	7.63207e+06	9.46657e+06	1.01893e+07	9.2236e+06	1.02763e+07	1.05973e+07	1.03069e+07	7.58879e+06	8.00817e+06	8.32069e+06	5.92864e+06	6.45166e+06	6.78859e+06	7.67722e+06	8.68307e+06	8.28992e+06	9.75377e+06	1.0421e+07	9.2351e+06	6.84843e+06	7.26114e+06	7.12045e+06	6.41157e+06	7.4278e+06	6.6148e+06	7.29971e+06	8.06734e+06	6.89791e+06	8.46761e+06	9.33691e+06	8.73437e+06	8.77301e+06	9.3371e+06	9.12272e+06	1.16478e+07	1.19469e+07	1.14474e+07	1.14539e+07	1.23993e+07	1.24854e+07	7.16727e+06	7.56491e+06	7.16274e+06	7.7696e+06	8.36899e+06	8.60257e+06	9.86312e+06
L-Tryptophan	8.12749e+08	9.70308e+08	9.1048e+08	1.43339e+09	1.51155e+09	1.39213e+09	8.10981e+08	8.41473e+08	8.61948e+08	6.39513e+08	7.48687e+08	7.78118e+08	5.45188e+08	6.30646e+08	5.70331e+08	5.58518e+08	5.95737e+08	5.54607e+08	4.92243e+08	5.48396e+08	4.9593e+08	4.89713e+08	5.99358e+08	5.35344e+08	3.86913e+08	5.03837e+08	5.37605e+08	8.45803e+08	9.54304e+08	7.88634e+08	7.28501e+08	8.38299e+08	8.04063e+08	9.86238e+08	1.07934e+09	1.03831e+09	5.39685e+08	6.27368e+08	6.98958e+08	7.6262e+08	9.20973e+08	8.7653e+08	5.82375e+08	7.44027e+08	6.96586e+08	5.53665e+08	6.83931e+08	6.16896e+08	6.57034e+08
Acetylcarnitine	1.17289e+09	1.19708e+09	1.19301e+09	8.64182e+08	9.38424e+08	8.53183e+08	1.21769e+09	1.23996e+09	1.25441e+09	6.58841e+08	7.19897e+08	6.16145e+08	7.69768e+08	7.96551e+08	7.50069e+08	6.28811e+08	6.67121e+08	6.83443e+08	7.78221e+08	8.18563e+08	8.38099e+08	6.80023e+08	7.14086e+08	7.19207e+08	6.30713e+08	6.54303e+08	6.66436e+08	8.74661e+08	9.1403e+08	9.10949e+08	9.35065e+08	1.04971e+09	1.00336e+09	6.18121e+08	7.06077e+08	6.38632e+08	9.83715e+08	1.0213e+09	1.00546e+09	7.53523e+08	8.28189e+08	8.17398e+08	7.90936e+08	8.62356e+08	8.64322e+08	8.41874e+08	9.46827e+08	9.32156e+08	8.90563e+08
Alpha-N-Phenylacetyl-L-glutamine	1.87104e+07	2.58965e+07	1.30473e+07	2.66905e+07	3.80926e+07	2.88416e+07	3.17126e+07	3.7139e+07	4.12875e+07	3.68316e+07	4.42737e+07	4.35887e+07	4.97499e+07	6.14151e+07	5.76664e+07	1.29217e+07	1.77104e+07	1.7843e+07	3.42212e+07	3.70715e+07	3.90772e+07	2.21428e+07	2.92687e+07	2.71764e+07	3.55487e+07	4.14708e+07	4.51909e+07	3.32351e+07	3.81322e+07	4.03227e+07	3.54117e+07	4.0211e+07	4.10202e+07	3.90249e+07	4.41931e+07	3.57297e+07	8.18492e+07	9.55004e+07	8.73768e+07	2.20102e+07	3.26808e+07	2.58611e+07	3.47342e+07	4.6954e+07	3.9235e+07	4.01034e+07	5.44625e+07	4.77175e+07	3.42061e+07
L-Histidine	1.66328e+09	1.79173e+09	1.91595e+09	3.98553e+09	4.20209e+09	4.10152e+09	1.3561e+08	3.54264e+08	3.6751e+08	1.08871e+08	3.44105e+08	2.71785e+08	7.32111e+07	2.82765e+08	2.48054e+08	1.03361e+08	3.5961e+08	1.65913e+08	2.1361e+07	2.40598e+08	2.37125e+08	1.40491e+08	2.8278e+08	1.71179e+08	1.33928e+08	2.77252e+08	2.18076e+08	6.20598e+07	3.33761e+08	2.72407e+08	2.18401e+08	2.92012e+08	2.26711e+08	2.41751e+08	2.72154e+08	2.32405e+08	1.70749e+08	3.81766e+08	1.17037e+08	1.08716e+08	3.30774e+08	2.82658e+08	2.32081e+08	3.82471e+08	1.18378e+08	1.92497e+08	3.83814e+08	1.25764e+08	1.03804e+08
d-glucose_neg	1.67759e+07	1.71247e+07	1.67371e+07	1.9516e+07	2.12969e+07	1.87073e+07	1.85508e+07	1.96776e+07	1.80171e+07	1.49702e+07	1.63163e+07	1.69914e+07	1.28075e+07	1.44354e+07	1.40105e+07	1.34771e+07	1.46051e+07	1.49483e+07	1.69645e+07	1.81171e+07	1.89748e+07	1.48177e+07	1.56705e+07	1.40017e+07	1.58399e+07	1.75526e+07	1.45859e+07	1.67138e+07	1.71984e+07	1.63312e+07	1.79531e+07	1.85853e+07	1.86108e+07	1.95368e+07	2.15112e+07	1.95548e+07	2.17006e+07	2.38621e+07	2.29742e+07	2.76309e+07	2.93774e+07	2.8912e+07	1.59342e+07	1.71522e+07	1.60684e+07	1.54025e+07	1.77257e+07	1.66687e+07	2.15825e+07
Hydroxyisocaproic acid_neg	1.41749e+07	1.63458e+07	1.5036e+07	1.51991e+07	1.71867e+07	1.79246e+07	2.40221e+07	2.57439e+07	2.42525e+07	2.18279e+07	2.3387e+07	2.47742e+07	2.09348e+07	2.25105e+07	2.08632e+07	1.78146e+07	1.94786e+07	1.88971e+07	1.03826e+07	1.22373e+07	1.25603e+07	1.28583e+07	1.46583e+07	1.25378e+07	1.11606e+07	1.3678e+07	1.22545e+07	2.45601e+07	2.57463e+07	2.47364e+07	1.62521e+07	1.76435e+07	1.69839e+07	2.10407e+07	2.36679e+07	2.20682e+07	2.55488e+07	2.79791e+07	2.66833e+07	2.44238e+07	2.66033e+07	2.44146e+07	1.72695e+07	1.75296e+07	1.77423e+07	1.53712e+07	1.61717e+07	1.4828e+07	2.73735e+07
Quinolinic acid	9.41462e+06	1.03508e+07	9.66903e+06	8.1089e+06	8.54587e+06	7.96589e+06	6.58642e+06	7.0882e+06	6.28103e+06	9.30454e+06	9.65398e+06	9.49128e+06	1.87029e+07	1.92483e+07	1.90957e+07	2.68262e+06	3.59312e+06	3.13737e+06	2.42364e+07	2.44158e+07	2.42274e+07	1.51833e+07	1.60154e+07	1.58381e+07	8.1129e+06	8.60679e+06	8.43317e+06	1.52265e+07	1.58855e+07	1.56805e+07	611791	1.31823e+06	625568	2.54243e+06	3.27685e+06	2.49274e+06	2.18747e+07	2.24385e+07	2.28562e+07	1.04125e+07	1.13522e+07	1.1055e+07	2.18421e+07	2.20697e+07	2.18157e+07	95291.9	1.04689e+06	480237	1.26926e+06
Kynurenine (1)_neg	5.00313e+06	5.94171e+06	5.95531e+06	4.55269e+06	5.37981e+06	3.83783e+06	5.42489e+06	6.10168e+06	5.44165e+06	7.0057e+06	7.4817e+06	7.51373e+06	7.98425e+06	8.69821e+06	7.66107e+06	3.30276e+06	3.98238e+06	4.64044e+06	4.19123e+06	4.48854e+06	4.75398e+06	6.46497e+06	7.72562e+06	6.40958e+06	4.4727e+06	5.7107e+06	4.51262e+06	4.02195e+06	5.10018e+06	4.49302e+06	6.86674e+06	7.0357e+06	6.7013e+06	5.97772e+06	6.87467e+06	7.40476e+06	4.62835e+06	5.56788e+06	6.06315e+06	7.70189e+06	8.77302e+06	7.33448e+06	4.84293e+06	5.72844e+06	5.80874e+06	4.64934e+06	5.51197e+06	5.59044e+06	4.16057e+06
Pyridoxamine	6.0943e+08	6.47633e+08	6.14083e+08	4.17456e+08	4.67624e+08	4.34094e+08	6.69953e+08	6.97486e+08	6.98848e+08	4.51718e+08	5.09606e+08	4.66039e+08	2.794e+08	3.30246e+08	3.48446e+08	2.5814e+08	3.04616e+08	2.48672e+08	5.4164e+08	5.88703e+08	5.42211e+08	4.43825e+08	4.67194e+08	4.54166e+08	4.55846e+08	5.04795e+08	4.88563e+08	5.308e+08	5.64997e+08	5.71946e+08	4.48444e+08	4.9865e+08	5.07129e+08	4.69441e+08	5.05165e+08	5.01075e+08	5.52705e+08	6.01745e+08	5.28409e+08	4.36982e+08	4.61316e+08	4.8422e+08	5.57022e+08	5.90167e+08	5.8477e+08	4.01528e+08	4.45927e+08	3.6785e+08	4.9641e+08
Melatonin	1.25761e+07	1.45451e+07	1.49231e+07	6.40185e+07	6.89776e+07	5.96247e+07	4.99532e+07	5.30368e+07	5.37464e+07	1.02012e+07	1.30859e+07	8.86801e+06	1.53561e+07	1.89676e+07	2.04263e+07	6.35413e+06	1.08971e+07	9.08666e+06	1.28225e+07	1.82223e+07	1.35633e+07	9.05864e+06	1.74671e+07	1.33256e+07	9.02562e+06	1.43086e+07	8.7873e+06	1.40484e+07	1.66904e+07	1.38469e+07	2.19325e+07	2.88026e+07	2.972e+07	1.53875e+07	2.0257e+07	1.23164e+07	2.12984e+07	2.29721e+07	2.06457e+07	1.03387e+07	1.36897e+07	9.18972e+06	1.26689e+07	1.99805e+07	1.24415e+07	1.69944e+07	2.33415e+07	1.65072e+07	9.49552e+06
Cystine (1)	1.5333e+07	1.63264e+07	1.69827e+07	8.03629e+06	1.07928e+07	9.99775e+06	1.80209e+07	2.04516e+07	1.93488e+07	1.73264e+07	1.98077e+07	1.77839e+07	1.28939e+07	1.44729e+07	1.30233e+07	1.28135e+07	1.4794e+07	1.53194e+07	1.26276e+07	1.32835e+07	1.34408e+07	7.21482e+06	9.70292e+06	8.65016e+06	9.83157e+06	1.13113e+07	8.81353e+06	1.20469e+07	1.41939e+07	1.31415e+07	1.48941e+07	1.68727e+07	1.4798e+07	1.28617e+07	1.54662e+07	1.5088e+07	1.48333e+07	1.65908e+07	1.48717e+07	1.62123e+07	1.79817e+07	1.74746e+07	1.29494e+07	1.45398e+07	1.25004e+07	1.43823e+07	1.66292e+07	1.3968e+07	1.97615e+07
Homogentisic acid_neg	1.08505e+08	1.14117e+08	1.13552e+08	7.70322e+07	8.9354e+07	8.88395e+07	1.48951e+08	1.6679e+08	1.59162e+08	1.12611e+08	1.24758e+08	1.29083e+08	1.14506e+08	1.26772e+08	1.0896e+08	7.59719e+07	8.53887e+07	8.15685e+07	1.20812e+08	1.33893e+08	1.27603e+08	1.01492e+08	1.06481e+08	1.08652e+08	1.23804e+08	1.28665e+08	1.23291e+08	1.06642e+08	1.13439e+08	1.06501e+08	9.33985e+07	1.00985e+08	8.98151e+07	9.63553e+07	1.05658e+08	9.27003e+07	1.1074e+08	1.18459e+08	1.07394e+08	7.77768e+07	9.49012e+07	8.44556e+07	9.51652e+07	1.12965e+08	1.03817e+08	7.34708e+07	8.3097e+07	8.77256e+07	1.10435e+08
acetyl-CoA (2)	8.35586e+06	9.61411e+06	8.58831e+06	2.80812e+06	3.02328e+06	3.14974e+06	2.64801e+06	3.36839e+06	2.48781e+06	1.94414e+06	2.54494e+06	1.6634e+06	1.48911e+06	2.475e+06	1.66952e+06	1.03222e+06	1.64455e+06	2.20611e+06	2.08333e+06	3.0751e+06	2.47019e+06	1.2695e+06	2.12773e+06	1.1878e+06	1.09699e+06	1.46466e+06	983985	5.10633e+06	5.87252e+06	5.25223e+06	3.62852e+06	4.52398e+06	3.30132e+06	3.32289e+06	4.49028e+06	3.81121e+06	3.05174e+06	4.2543e+06	4.05329e+06	2.38721e+06	3.12326e+06	2.93924e+06	2.60963e+06	3.219e+06	2.79453e+06	2.46109e+06	2.90173e+06	2.77385e+06	2.08938e+06
caffeine	6.16833e+07	7.14571e+07	6.26086e+07	2.57434e+07	4.18761e+07	3.50061e+07	9.64803e+07	1.04818e+08	9.4533e+07	2.56273e+08	2.74251e+08	2.64757e+08	8.39167e+07	8.90143e+07	9.1024e+07	2.29494e+07	2.33241e+07	2.27219e+07	4.57408e+07	6.0653e+07	4.62965e+07	6.57043e+07	7.53479e+07	6.30859e+07	8.10336e+07	9.84424e+07	8.54902e+07	1.31026e+08	1.40442e+08	1.28145e+08	1.84375e+08	1.9628e+08	1.86079e+08	3.09507e+08	3.22181e+08	3.24252e+08	1.38525e+08	1.57706e+08	1.49527e+08	5.14696e+08	5.28431e+08	5.13936e+08	1.14598e+08	1.33508e+08	1.24751e+08	1.12239e+08	1.25528e+08	1.25411e+08	8.81538e+07
L-Kynurenine (2)	6.62875e+07	7.01892e+07	6.31753e+07	4.9674e+07	5.99746e+07	5.30964e+07	6.27451e+07	6.84311e+07	6.92391e+07	7.91167e+07	8.2409e+07	7.68613e+07	7.95874e+07	8.29079e+07	8.23271e+07	4.78099e+07	5.53627e+07	5.63135e+07	5.51977e+07	6.147e+07	5.41003e+07	5.37911e+07	6.44548e+07	5.8359e+07	5.08955e+07	5.37198e+07	4.99274e+07	6.30153e+07	6.90614e+07	6.69362e+07	8.32322e+07	9.28394e+07	8.84436e+07	8.0165e+07	8.5717e+07	7.81934e+07	6.76405e+07	7.2627e+07	7.28445e+07	9.01006e+07	9.54138e+07	9.88227e+07	8.17001e+07	8.41874e+07	8.6091e+07	6.76642e+07	7.30614e+07	6.42477e+07	5.31079e+07
xanthine	1.85638e+08	3.06892e+08	1.9137e+08	1.88831e+08	2.69261e+08	1.27363e+08	6.01166e+08	6.6059e+08	6.71196e+08	1.64456e+08	2.16523e+08	1.26042e+08	2.32724e+08	3.45902e+08	2.00397e+08	6.41711e+07	1.732e+08	2.22049e+08	1.07372e+09	1.19897e+09	1.05594e+09	2.83553e+08	3.44984e+08	2.41659e+08	1.41873e+08	2.49035e+08	8.71697e+07	2.57313e+08	3.58495e+08	2.87412e+08	1.86844e+08	2.82467e+08	2.19611e+08	1.1097e+08	1.95832e+08	2.69613e+08	1.86581e+08	3.22332e+08	2.02458e+08	1.68098e+08	2.91099e+08	1.55242e+08	1.65799e+08	3.1167e+08	2.44231e+08	1.97753e+08	2.95321e+08	1.67074e+08	2.17221e+08
Pyroglutamic acid_neg	2.2535e+06	2.34444e+06	2.28519e+06	3.07665e+06	3.31438e+06	3.34344e+06	2.51619e+06	2.82898e+06	2.51279e+06	1.78307e+06	1.95496e+06	1.82171e+06	913138	1.06764e+06	807768	1.41419e+06	1.6757e+06	1.52976e+06	1.61509e+06	2.03753e+06	1.70955e+06	527081	688992	418510	535236	814396	765035	1.45785e+06	1.84399e+06	1.56362e+06	1.04869e+06	1.33724e+06	881946	852801	1.20319e+06	1.11606e+06	1.09678e+06	1.41542e+06	1.07204e+06	1.01686e+06	1.31128e+06	1.37218e+06	1.83718e+06	1.88524e+06	1.79326e+06	938935	1.13611e+06	1.06994e+06	1.65724e+06
cytidine	2.36605e+06	2.48652e+06	2.55334e+06	1.04248e+06	1.18512e+06	1.26732e+06	2.62922e+06	2.76825e+06	2.52529e+06	1.55187e+06	1.79714e+06	1.55756e+06	840062	1.07891e+06	842391	1.14933e+06	1.44044e+06	1.15812e+06	1.38886e+06	1.64357e+06	1.68366e+06	606793	921683	741911	1.88399e+06	2.19458e+06	2.12828e+06	1.27209e+06	1.45145e+06	1.27721e+06	2.07607e+06	2.36028e+06	2.18784e+06	853617	1.05805e+06	831067	1.71604e+06	1.98443e+06	1.72305e+06	1.87497e+06	1.90431e+06	1.85251e+06	1.57386e+06	1.62692e+06	1.56662e+06	1.00316e+06	1.31062e+06	1.14493e+06	778761
2-Aminooctanoic acid (1)	6.14159e+07	7.24719e+07	6.91535e+07	2.4781e+07	3.61758e+07	2.56103e+07	6.15779e+07	6.80582e+07	5.99414e+07	5.27139e+07	6.01052e+07	6.47223e+07	7.7828e+07	8.99445e+07	8.82822e+07	6.9218e+07	7.92239e+07	8.09054e+07	4.76555e+07	5.8737e+07	4.55872e+07	6.37788e+07	7.71628e+07	6.54402e+07	9.0222e+07	1.01584e+08	9.7858e+07	6.12672e+07	7.24576e+07	6.41526e+07	1.12646e+08	1.16055e+08	1.16158e+08	6.92404e+07	7.47688e+07	7.92013e+07	8.92241e+07	1.00143e+08	1.03911e+08	8.1394e+07	9.58829e+07	8.48678e+07	3.89392e+07	4.71371e+07	5.10712e+07	9.37253e+07	1.05054e+08	9.33369e+07	6.83232e+07
L-Valine	7.49972e+07	8.70184e+07	9.07587e+07	7.84804e+07	8.87171e+07	6.94476e+07	1.09175e+08	1.20225e+08	1.29523e+08	1.03744e+08	1.14872e+08	1.02067e+08	1.18149e+08	1.27487e+08	1.3473e+08	6.41838e+07	7.25803e+07	6.93655e+07	8.19858e+07	9.36652e+07	9.24459e+07	6.91432e+07	8.12754e+07	8.25714e+07	7.8495e+07	9.35978e+07	8.20863e+07	1.08869e+08	1.23815e+08	1.1729e+08	1.07706e+08	1.15636e+08	1.13287e+08	1.16216e+08	1.27112e+08	1.32293e+08	1.34673e+08	1.4157e+08	1.28242e+08	1.3738e+08	1.41378e+08	1.37664e+08	8.60022e+07	9.78955e+07	1.01521e+08	1.14864e+08	1.30632e+08	1.17147e+08	1.15257e+08
serotonin	8.1767e+06	8.45593e+06	7.98197e+06	6.17903e+06	6.89814e+06	6.40191e+06	6.00217e+06	6.45553e+06	6.10239e+06	8.759e+06	9.15235e+06	9.49502e+06	7.53746e+06	8.22334e+06	8.30454e+06	7.05614e+06	7.21307e+06	7.17196e+06	6.85902e+06	7.55746e+06	7.61384e+06	4.24852e+06	5.19546e+06	4.69941e+06	5.93655e+06	6.33789e+06	5.6984e+06	5.90298e+06	6.56621e+06	5.73829e+06	8.22027e+06	8.62468e+06	8.93117e+06	5.6489e+06	6.03416e+06	6.12846e+06	8.46344e+06	8.7525e+06	8.19383e+06	7.61126e+06	8.12718e+06	8.04538e+06	6.80716e+06	7.4526e+06	7.1596e+06	6.73133e+06	7.42988e+06	6.75464e+06	6.85519e+06
Guanidinoacetic acid	1.96095e+07	2.37488e+07	2.41338e+07	8.24469e+06	1.17776e+07	7.41117e+06	2.10067e+07	2.3376e+07	2.22843e+07	1.66388e+07	1.80389e+07	1.93554e+07	4.06522e+07	4.32095e+07	4.30485e+07	2.96133e+06	4.67899e+06	1.31912e+06	2.13329e+07	2.43651e+07	2.2799e+07	2.45223e+06	4.64744e+06	2.85387e+06	3.18201e+06	4.47091e+06	3.2662e+06	2.64284e+07	2.81451e+07	2.83486e+07	7.53671e+06	9.92685e+06	1.05883e+07	4.88438e+06	9.00129e+06	4.63255e+06	2.42168e+07	2.69676e+07	2.71132e+07	5.76353e+06	7.87905e+06	5.2765e+06	2.79653e+07	3.20579e+07	3.01288e+07	1.90502e+07	2.21388e+07	1.65327e+07	1.26292e+07
Lipoamide	5.25859e+08	5.89377e+08	5.30444e+08	7.71309e+08	8.39557e+08	7.85942e+08	4.28389e+08	4.82683e+08	5.32083e+08	3.70038e+08	4.5515e+08	3.75217e+08	2.72142e+08	2.9453e+08	3.11092e+08	2.64648e+08	3.47067e+08	2.59905e+08	2.73851e+08	2.99617e+08	2.91334e+08	2.52554e+08	3.13757e+08	2.8694e+08	2.251e+08	2.47172e+08	2.25968e+08	4.70908e+08	5.20365e+08	5.37237e+08	3.89608e+08	4.52299e+08	4.88689e+08	6.02326e+08	6.48901e+08	5.63278e+08	3.29736e+08	3.90445e+08	3.10871e+08	4.77107e+08	5.35699e+08	4.57781e+08	3.12855e+08	4.09744e+08	3.46012e+08	3.1381e+08	3.58998e+08	3.87119e+08	3.51503e+08
Methylmalonic acid_neg	4.16765e+07	4.32154e+07	4.16229e+07	9.34317e+06	1.04474e+07	1.13358e+07	3.83151e+06	5.0999e+06	6.03998e+06	4.20854e+06	6.0887e+06	5.23458e+06	2.02505e+06	3.38601e+06	1.26701e+06	2.31249e+06	3.5631e+06	2.41381e+06	3.52038e+06	4.21991e+06	2.83783e+06	4.70258e+06	8.38545e+06	5.99052e+06	2.17488e+06	4.21024e+06	2.00958e+06	3.53347e+06	6.37643e+06	7.06686e+06	2.77416e+06	5.11679e+06	3.18113e+06	2.39381e+06	5.19808e+06	4.0038e+06	5.26e+06	6.40091e+06	6.36226e+06	6.50505e+06	7.25573e+06	6.16339e+06	1.74997e+06	5.08016e+06	2.63849e+06	2.58797e+06	4.78337e+06	5.53157e+06	2.95815e+06
Pyroglutamic acid	1.03028e+07	1.08282e+07	1.03555e+07	1.07892e+07	1.23768e+07	1.1416e+07	1.08497e+07	1.12856e+07	1.13729e+07	6.11094e+06	7.19967e+06	7.29682e+06	9.49558e+06	1.01012e+07	1.06901e+07	4.64376e+06	5.72138e+06	4.57526e+06	6.44388e+06	7.91476e+06	6.42115e+06	2.62225e+06	3.38191e+06	2.67312e+06	8.31241e+06	9.58443e+06	9.07382e+06	2.22894e+06	3.74832e+06	2.61633e+06	1.49736e+06	1.808e+06	1.2676e+06	5.35763e+06	6.30358e+06	5.27291e+06	8.13949e+06	8.74985e+06	8.69791e+06	4.83999e+06	5.68031e+06	5.68531e+06	4.10586e+06	5.19209e+06	4.53359e+06	5.60788e+06	6.93953e+06	5.69463e+06	3.01449e+06
xanthosine	5.50162e+06	7.7826e+06	5.52277e+06	5.63539e+06	8.05295e+06	3.44192e+06	3.98577e+06	7.52367e+06	5.75157e+06	5.17446e+06	9.06441e+06	6.15432e+06	4.33134e+06	5.11777e+06	5.63142e+06	3.06727e+06	5.23967e+06	3.19263e+06	7.29499e+07	7.51045e+07	7.44777e+07	4.01584e+06	8.5585e+06	5.23768e+06	1.88118e+06	5.20468e+06	4.41308e+06	3.03866e+06	7.25388e+06	5.03177e+06	3.81274e+06	7.30594e+06	2.90711e+06	2.89002e+06	6.73852e+06	3.46888e+06	5.68337e+06	7.77877e+06	9.19881e+06	4.7858e+06	6.7046e+06	4.6277e+06	4.23405e+06	5.71142e+06	4.32607e+06	3.45612e+06	6.04115e+06	7.67607e+06	3.98478e+06
L-Phenylalanine	1.25943e+09	1.33885e+09	1.32488e+09	1.3869e+09	1.46446e+09	1.42864e+09	1.47767e+09	1.53489e+09	1.55684e+09	1.24816e+09	1.29507e+09	1.30623e+09	1.18388e+09	1.26243e+09	1.16853e+09	1.17326e+09	1.1899e+09	1.20542e+09	1.15321e+09	1.26067e+09	1.20535e+09	1.4309e+09	1.4809e+09	1.46783e+09	1.10942e+09	1.21169e+09	1.18219e+09	1.3269e+09	1.38686e+09	1.42491e+09	1.61379e+09	1.68985e+09	1.73648e+09	1.41541e+09	1.43879e+09	1.40505e+09	1.4449e+09	1.50852e+09	1.39287e+09	1.49652e+09	1.53379e+09	1.56367e+09	1.45881e+09	1.51764e+09	1.52949e+09	1.44652e+09	1.50226e+09	1.40309e+09	1.45201e+09
L-Proline	4.79533e+08	5.02975e+08	4.85535e+08	5.3257e+08	5.67772e+08	5.55014e+08	4.61919e+08	5.16214e+08	4.8604e+08	5.33695e+08	5.66106e+08	5.44368e+08	4.18183e+08	4.53858e+08	4.38863e+08	4.43678e+08	4.67934e+08	4.38099e+08	4.63605e+08	4.95435e+08	4.62105e+08	3.74373e+08	4.2121e+08	4.02172e+08	3.64444e+08	3.84939e+08	3.78964e+08	4.249e+08	4.51401e+08	4.10132e+08	6.05184e+08	6.26815e+08	6.1013e+08	4.6221e+08	5.02764e+08	4.92414e+08	5.30722e+08	5.70299e+08	5.45605e+08	5.63845e+08	5.86334e+08	5.5122e+08	3.65042e+08	4.17235e+08	3.96907e+08	4.82721e+08	4.90575e+08	4.91242e+08	4.84737e+08
Ascorbic acid	1.36557e+07	1.47195e+07	1.40675e+07	1.29297e+07	1.41933e+07	1.32334e+07	7.99272e+06	8.98823e+06	9.33443e+06	1.65535e+07	1.75726e+07	1.58481e+07	1.40205e+07	1.52329e+07	1.4626e+07	1.53707e+07	1.59903e+07	1.53694e+07	1.29223e+07	1.33664e+07	1.35288e+07	7.35692e+06	7.83063e+06	7.91227e+06	1.00007e+07	1.11609e+07	1.0327e+07	1.23688e+07	1.33804e+07	1.27469e+07	1.5473e+07	1.66087e+07	1.52656e+07	1.14566e+07	1.28429e+07	1.23968e+07	1.68119e+07	1.8633e+07	1.76041e+07	1.43793e+07	1.52242e+07	1.42905e+07	1.24371e+07	1.34562e+07	1.21791e+07	1.136e+07	1.22354e+07	1.13598e+07	1.5243e+07
creatine	1.71091e+08	2.07148e+08	1.94134e+08	3.01985e+08	3.35106e+08	2.87132e+08	1.75187e+08	2.08179e+08	2.1267e+08	1.48972e+08	1.58918e+08	1.57377e+08	1.82536e+08	2.28292e+08	2.18926e+08	1.97468e+08	2.3232e+08	2.34648e+08	1.09846e+08	1.39686e+08	1.20413e+08	2.30961e+08	2.72979e+08	2.4478e+08	1.74837e+08	2.03839e+08	1.63912e+08	3.01674e+08	3.33001e+08	3.41287e+08	3.20744e+08	3.55096e+08	3.35479e+08	2.05361e+08	2.14185e+08	2.14281e+08	2.47446e+08	2.60654e+08	2.58962e+08	2.08525e+08	2.47933e+08	2.35356e+08	1.95734e+08	2.14764e+08	1.81166e+08	2.65467e+08	2.83594e+08	2.61467e+08	2.51657e+08
cystine (2)	1.00746e+07	1.11751e+07	1.07138e+07	4.15802e+06	5.6326e+06	4.46206e+06	9.97047e+06	1.04341e+07	1.05788e+07	9.59435e+06	9.80986e+06	9.53366e+06	6.6876e+06	7.87123e+06	8.06008e+06	5.67344e+06	6.5407e+06	6.01866e+06	8.34587e+06	9.27409e+06	7.76243e+06	4.98464e+06	5.9096e+06	4.42422e+06	4.91889e+06	5.36633e+06	5.18911e+06	6.18456e+06	7.49685e+06	7.59285e+06	7.90578e+06	8.98374e+06	9.97603e+06	8.1871e+06	9.00692e+06	8.51333e+06	8.09579e+06	8.64105e+06	7.894e+06	8.81302e+06	9.58465e+06	9.64573e+06	6.55164e+06	7.647e+06	6.80654e+06	8.84157e+06	1.04797e+07	9.0058e+06	1.2651e+07
Urea	4.21331e+08	5.13386e+08	4.59773e+08	4.3819e+08	4.88158e+08	4.33017e+08	9.34712e+08	1.03046e+09	9.71449e+08	6.307e+08	6.58972e+08	6.05696e+08	5.94175e+08	6.11757e+08	5.95924e+08	4.87384e+08	5.56917e+08	5.43687e+08	5.18713e+08	6.05265e+08	5.63011e+08	4.27562e+08	4.87654e+08	4.60611e+08	5.11537e+08	5.74226e+08	5.73685e+08	5.24031e+08	5.56934e+08	5.31049e+08	4.83359e+08	5.11956e+08	5.06485e+08	4.23522e+08	4.6505e+08	4.42178e+08	6.22683e+08	6.70594e+08	6.71484e+08	4.49532e+08	4.75404e+08	4.83829e+08	5.1511e+08	5.66399e+08	5.40295e+08	5.1002e+08	5.3917e+08	5.10301e+08	5.43124e+08
L-Kynurenine (1)	4.6208e+07	5.07844e+07	4.39607e+07	3.20486e+07	3.6457e+07	3.59929e+07	4.47327e+07	4.7864e+07	4.55093e+07	4.25719e+07	4.748e+07	4.78322e+07	5.42212e+07	5.88585e+07	5.22591e+07	3.01356e+07	3.5718e+07	3.35299e+07	3.45757e+07	3.50835e+07	3.43208e+07	4.04532e+07	4.40548e+07	3.74275e+07	2.69289e+07	3.1507e+07	3.28152e+07	4.17261e+07	4.41769e+07	3.97421e+07	6.08582e+07	6.33248e+07	6.11128e+07	5.33846e+07	5.70257e+07	5.94878e+07	4.67342e+07	4.92457e+07	5.07311e+07	5.93386e+07	6.36735e+07	6.55305e+07	5.13513e+07	5.41639e+07	5.67075e+07	4.28547e+07	4.9109e+07	4.4126e+07	3.57771e+07
N-acetyl-glutamine	3.54518e+07	3.8348e+07	3.7074e+07	4.53063e+07	4.85697e+07	5.13525e+07	4.92286e+07	5.25913e+07	5.50875e+07	3.4005e+07	3.71419e+07	3.57248e+07	3.58092e+07	4.10064e+07	3.90877e+07	5.05272e+07	5.40751e+07	5.46981e+07	1.93017e+07	2.26503e+07	2.5338e+07	2.736e+07	3.2934e+07	2.71032e+07	2.84898e+07	3.05082e+07	3.17398e+07	2.90166e+07	3.49383e+07	3.44037e+07	4.99783e+07	5.35977e+07	5.4389e+07	5.10681e+07	5.5377e+07	5.13964e+07	5.75187e+07	6.19765e+07	5.74178e+07	3.98476e+07	4.73429e+07	4.34199e+07	2.97013e+07	3.59161e+07	3.31454e+07	4.65374e+07	5.01584e+07	5.27558e+07	4.66574e+07
Succinic acid_neg	4.10796e+07	4.27718e+07	4.24246e+07	8.61992e+06	9.36082e+06	1.00009e+07	3.99809e+06	5.60677e+06	4.9702e+06	4.20829e+06	5.80096e+06	7.18976e+06	198479	2.45673e+06	2.53952e+06	2.35477e+06	4.28577e+06	2.60491e+06	2.2226e+06	3.77101e+06	4.38121e+06	2.88331e+06	3.40635e+06	3.85791e+06	2.6414e+06	5.67548e+06	3.68361e+06	2.78267e+06	4.89923e+06	5.39617e+06	2.98394e+06	4.43553e+06	4.08072e+06	3.15777e+06	5.70901e+06	4.52609e+06	3.28242e+06	5.99704e+06	5.64488e+06	5.29965e+06	5.74121e+06	5.91895e+06	3.45795e+06	3.71613e+06	3.85564e+06	2.97146e+06	4.06176e+06	4.73605e+06	3.79056e+06
Lysine + glutamine	2.64211e+08	3.04001e+08	2.88919e+08	3.74573e+08	3.94234e+08	3.67769e+08	2.2963e+08	2.67822e+08	2.38469e+08	2.00711e+08	2.2986e+08	2.1851e+08	2.04811e+08	2.23857e+08	2.10613e+08	2.06292e+08	2.21254e+08	1.93663e+08	2.16661e+08	2.40648e+08	2.43547e+08	2.13637e+08	2.34518e+08	1.9839e+08	2.13255e+08	2.44381e+08	2.30405e+08	2.55086e+08	2.74173e+08	2.60956e+08	2.43041e+08	2.67454e+08	2.84918e+08	2.7187e+08	2.8531e+08	2.80177e+08	2.72761e+08	2.77656e+08	2.70192e+08	1.23692e+08	1.52471e+08	1.55838e+08	2.59447e+08	2.7177e+08	2.57423e+08	2.56969e+08	2.82327e+08	2.86934e+08	2.85095e+08
mevalonic acid	1.16574e+08	1.28436e+08	1.22537e+08	1.39151e+08	1.48523e+08	1.38588e+08	1.59331e+08	1.67443e+08	1.5353e+08	1.23232e+08	1.29872e+08	1.20105e+08	1.0499e+08	1.1518e+08	1.1576e+08	1.04545e+08	1.16257e+08	1.07614e+08	1.09208e+08	1.16306e+08	1.05041e+08	1.44339e+08	1.58099e+08	1.5026e+08	9.55247e+07	1.0957e+08	1.01903e+08	1.25446e+08	1.37072e+08	1.28044e+08	1.66452e+08	1.75541e+08	1.75348e+08	1.34603e+08	1.37483e+08	1.34381e+08	1.41577e+08	1.46901e+08	1.46073e+08	1.48963e+08	1.54303e+08	1.57711e+08	1.48218e+08	1.55109e+08	1.57687e+08	1.45165e+08	1.52836e+08	1.53836e+08	1.424e+08
Glycerophosphocholine	3.17334e+08	3.54076e+08	3.23885e+08	2.24164e+08	2.69373e+08	2.49634e+08	1.68342e+08	2.09014e+08	1.99716e+08	2.87183e+08	3.12515e+08	3.18268e+08	1.94618e+08	2.10737e+08	2.00894e+08	2.19613e+08	2.31728e+08	2.32398e+08	1.97225e+08	2.1837e+08	2.22654e+08	1.54661e+07	3.89268e+07	4.2201e+07	5.23924e+07	7.87822e+07	8.35329e+07	3.27961e+08	3.65243e+08	3.36904e+08	2.74964e+08	3.05549e+08	3.12426e+08	2.26363e+08	2.5901e+08	2.27797e+08	2.86419e+08	3.00572e+08	2.89144e+08	3.49619e+08	3.85759e+08	3.57351e+08	3.07884e+08	3.50291e+08	3.31823e+08	2.68317e+08	2.9144e+08	2.49478e+08	2.65312e+08
indole	2.70498e+08	3.28266e+08	2.95257e+08	4.53895e+08	4.69167e+08	4.41579e+08	2.64336e+08	3.07995e+08	2.60859e+08	2.12613e+08	2.48086e+08	2.33376e+08	1.58482e+08	2.00501e+08	1.66676e+08	1.66819e+08	2.00058e+08	1.4803e+08	1.38368e+08	1.69515e+08	1.68221e+08	1.7655e+08	2.06587e+08	1.68707e+08	1.16935e+08	1.59113e+08	1.64714e+08	2.24554e+08	2.75422e+08	2.55455e+08	2.36426e+08	2.63572e+08	2.23403e+08	3.14215e+08	3.45613e+08	2.98892e+08	1.7036e+08	2.19774e+08	1.86705e+08	2.77773e+08	2.94909e+08	3.07145e+08	1.82452e+08	2.37553e+08	2.04886e+08	1.91257e+08	2.16959e+08	1.8188e+08	1.92284e+08
uracil	6.07251e+07	6.55974e+07	5.84478e+07	3.79469e+07	4.08521e+07	4.23053e+07	2.7586e+07	3.499e+07	3.57244e+07	5.92037e+07	5.94425e+07	5.96385e+07	2.08886e+07	2.88389e+07	2.91624e+07	2.67306e+07	3.36519e+07	2.48073e+07	3.35361e+07	3.90368e+07	4.12226e+07	3.77985e+07	4.1685e+07	3.54108e+07	9.48494e+06	1.88245e+07	1.47644e+07	6.44426e+07	6.54966e+07	6.55775e+07	3.88495e+07	4.55368e+07	4.20864e+07	4.9069e+07	5.9093e+07	5.28065e+07	5.22221e+07	5.74906e+07	4.86295e+07	4.29953e+07	5.27621e+07	4.63868e+07	4.8127e+07	5.39467e+07	4.90828e+07	3.6945e+07	4.48763e+07	4.07911e+07	6.8546e+07
3-hydroxykynurenine	7.06049e+08	7.47381e+08	7.34826e+08	5.8391e+08	6.03236e+08	5.73188e+08	6.5643e+08	7.01846e+08	6.87933e+08	6.28607e+08	6.51765e+08	6.58652e+08	6.44041e+08	6.89443e+08	6.83932e+08	6.0746e+08	6.41986e+08	6.46143e+08	5.81604e+08	5.98649e+08	5.93445e+08	6.38541e+08	6.78903e+08	6.46049e+08	5.06758e+08	5.33543e+08	5.38156e+08	7.35357e+08	7.47772e+08	7.38902e+08	7.59663e+08	7.88299e+08	7.98307e+08	6.95336e+08	7.34317e+08	7.31729e+08	6.8e+08	7.12666e+08	6.57735e+08	7.10115e+08	7.37224e+08	7.27147e+08	6.46318e+08	6.67206e+08	6.79948e+08	6.46253e+08	6.74482e+08	6.83408e+08	7.56096e+08
1,4-diaminobutane	1.23207e+08	1.41374e+08	1.46059e+08	1.19048e+08	1.45175e+08	1.39959e+08	5.94208e+07	9.00897e+07	7.07855e+07	4.81951e+07	7.38661e+07	6.30734e+07	1.00125e+08	1.13945e+08	1.1043e+08	3.40659e+07	5.43903e+07	6.11271e+07	6.8757e+07	9.30392e+07	7.36388e+07	3.1883e+07	5.08941e+07	3.71199e+07	6.01116e+07	6.98429e+07	6.79571e+07	1.06239e+08	1.23649e+08	9.57326e+07	4.38249e+07	6.7577e+07	4.60573e+07	4.75096e+07	5.88694e+07	5.37422e+07	8.92464e+07	9.84036e+07	9.70266e+07	3.32889e+07	5.09836e+07	5.72055e+07	1.00361e+08	1.08481e+08	1.11414e+08	9.31779e+07	1.0837e+08	9.15717e+07	2.01424e+08
beta aminobutyric acid	6.83731e+07	7.2573e+07	6.92916e+07	3.9546e+07	4.60456e+07	4.41142e+07	5.35592e+07	5.72069e+07	5.69574e+07	7.00301e+07	7.18201e+07	7.09496e+07	3.43315e+07	3.73201e+07	3.81779e+07	3.47103e+07	4.03118e+07	4.06376e+07	7.4753e+07	7.96257e+07	7.29247e+07	4.11723e+07	4.32981e+07	3.98861e+07	4.27371e+07	4.38836e+07	4.19386e+07	6.46758e+07	6.82632e+07	6.54799e+07	5.60222e+07	5.97379e+07	6.22674e+07	5.43185e+07	5.88447e+07	6.01101e+07	5.94592e+07	6.58089e+07	6.35117e+07	6.67183e+07	7.14271e+07	6.63878e+07	6.65707e+07	7.06572e+07	7.19037e+07	4.11318e+07	4.36967e+07	4.1461e+07	6.58094e+07
L-Arginine (1)	1.25296e+08	1.32711e+08	1.38202e+08	1.95307e+08	2.07382e+08	1.88775e+08	1.17365e+08	1.40062e+08	1.26322e+08	1.53054e+08	1.73045e+08	1.57463e+08	8.66691e+07	1.07572e+08	1.01417e+08	1.73486e+08	1.88352e+08	1.78128e+08	1.26544e+08	1.34186e+08	1.24656e+08	1.0707e+08	1.24601e+08	1.16363e+08	9.174e+07	1.03163e+08	1.11189e+08	1.46361e+08	1.5586e+08	1.49037e+08	1.62751e+08	1.76488e+08	1.80285e+08	1.50023e+08	1.72409e+08	1.61651e+08	1.61986e+08	1.73653e+08	1.53914e+08	1.65172e+08	1.82339e+08	1.6537e+08	1.94843e+08	2.08207e+08	2.04994e+08	1.38996e+08	1.47525e+08	1.54703e+08	1.59908e+08
L-Homoserine	4.3296e+06	4.48185e+06	4.31589e+06	4.61528e+06	5.10466e+06	4.77929e+06	4.73116e+06	5.34648e+06	5.06012e+06	3.80713e+06	3.94658e+06	3.75848e+06	3.44786e+06	3.80788e+06	3.42013e+06	3.13305e+06	3.66551e+06	3.46268e+06	3.15765e+06	3.43127e+06	3.46015e+06	4.35642e+06	4.92175e+06	4.6468e+06	3.73216e+06	4.15585e+06	3.83891e+06	3.81077e+06	4.52184e+06	4.11118e+06	6.65079e+06	7.18073e+06	7.12168e+06	4.18996e+06	4.68731e+06	4.09298e+06	3.53584e+06	4.18132e+06	4.1519e+06	5.43727e+06	5.7419e+06	5.91656e+06	5.2486e+06	5.78798e+06	5.53851e+06	5.32994e+06	5.36365e+06	5.37225e+06	5.37683e+06
5-Hydroxy-L-tryptophan	3.33767e+06	5.8181e+06	4.18875e+06	1.88104e+07	1.9182e+07	1.85414e+07	6.04203e+06	7.06155e+06	5.74385e+06	3.13029e+06	5.15363e+06	4.06483e+06	1.65464e+06	3.6251e+06	3.56515e+06	3.30958e+06	4.6e+06	5.84464e+06	4.63335e+06	6.11376e+06	6.05471e+06	2.41802e+06	4.06912e+06	1.61145e+06	1.78603e+06	3.56639e+06	1.87568e+06	3.11375e+06	3.80382e+06	4.48744e+06	3.58594e+06	4.37778e+06	2.86763e+06	4.99102e+06	6.40022e+06	5.01351e+06	2.20878e+06	4.17667e+06	3.37138e+06	6.34242e+06	8.07347e+06	8.43047e+06	4.49857e+06	5.9458e+06	6.22178e+06	4.76036e+06	6.38281e+06	4.15667e+06	2.15325e+06
Inosine	864025	1.46079e+06	1.13764e+06	2.0669e+06	2.49057e+06	2.05374e+06	1.16053e+07	1.20494e+07	1.12654e+07	9.75807e+06	1.00344e+07	1.00296e+07	1.57959e+06	1.58383e+06	1.57911e+06	249516	567919	682411	9.41737e+06	9.87238e+06	9.01915e+06	1.34962e+06	1.85428e+06	1.63533e+06	913966	1.21747e+06	679656	3.02425e+06	3.73697e+06	3.74279e+06	2.61541e+06	3.30072e+06	2.76818e+06	1.81461e+06	2.29859e+06	1.80054e+06	4.92792e+06	5.16971e+06	5.23301e+06	1.74872e+06	2.18937e+06	1.47376e+06	3.51484e+06	3.63443e+06	3.47746e+06	1.37287e+06	1.7631e+06	1.48326e+06	1.50351e+06
betaine	6.89678e+08	7.0484e+08	7.16764e+08	1.00716e+09	1.10274e+09	1.04272e+09	5.44606e+08	6.13283e+08	5.59497e+08	5.82409e+08	6.75367e+08	6.28334e+08	5.41344e+08	6.34016e+08	5.52868e+08	4.98219e+08	5.42771e+08	5.04897e+08	4.55597e+08	5.29899e+08	4.59718e+08	6.08076e+08	6.66014e+08	6.04567e+08	4.99527e+08	5.32132e+08	5.15748e+08	5.66531e+08	6.54607e+08	5.80348e+08	4.83691e+08	5.19113e+08	4.84222e+08	7.91125e+08	8.74459e+08	8.65636e+08	5.10191e+08	5.94628e+08	5.5352e+08	5.281e+08	5.83178e+08	6.33974e+08	5.33302e+08	6.24217e+08	5.66234e+08	5.57323e+08	6.18372e+08	6.51736e+08	7.25184e+08
L-Lactic acid_neg	2.90853e+07	3.06532e+07	2.94822e+07	3.48153e+07	3.78352e+07	3.56466e+07	5.02821e+07	5.31901e+07	5.14466e+07	2.69269e+07	2.96756e+07	3.02519e+07	2.02423e+07	2.3329e+07	2.19794e+07	2.69292e+07	3.14919e+07	2.86383e+07	3.13923e+07	3.29804e+07	3.03052e+07	2.75354e+07	3.01499e+07	2.70979e+07	2.23515e+07	2.40523e+07	2.54684e+07	3.64158e+07	3.93563e+07	3.97921e+07	3.14546e+07	3.55673e+07	3.54922e+07	4.86066e+07	4.88359e+07	4.87084e+07	3.22285e+07	3.65587e+07	3.34549e+07	4.32805e+07	4.66548e+07	4.81314e+07	2.81013e+07	3.15617e+07	3.33235e+07	3.20283e+07	3.52593e+07	3.65874e+07	3.39215e+07
3-Aminoisobutanoic acid	1.84338e+07	1.91523e+07	1.8037e+07	1.13625e+07	1.17684e+07	1.2138e+07	1.76151e+07	1.86228e+07	1.73223e+07	1.66947e+07	1.81617e+07	1.78815e+07	1.1182e+07	1.1965e+07	1.17487e+07	1.30643e+07	1.42402e+07	1.37283e+07	1.73273e+07	1.88776e+07	1.7665e+07	1.27345e+07	1.31443e+07	1.33426e+07	1.30708e+07	1.34482e+07	1.32948e+07	2.01739e+07	2.08427e+07	2.0926e+07	1.95769e+07	2.08333e+07	2.00094e+07	2.07284e+07	2.11094e+07	2.11509e+07	2.0557e+07	2.14342e+07	2.04329e+07	2.02842e+07	2.12381e+07	2.07641e+07	1.70201e+07	1.82535e+07	1.82638e+07	1.56526e+07	1.67039e+07	1.65334e+07	1.77808e+07
Aminoadipic acid_1	2.59823e+07	2.88346e+07	2.39597e+07	7.90277e+06	1.13956e+07	6.43373e+06	2.65378e+07	2.91873e+07	2.65833e+07	1.76027e+07	2.23056e+07	1.81567e+07	2.58757e+07	3.0342e+07	2.75254e+07	1.40909e+07	1.6128e+07	1.80664e+07	2.6305e+07	3.00807e+07	2.5813e+07	1.43846e+07	1.66728e+07	1.58876e+07	8.19043e+06	1.12439e+07	9.02468e+06	1.62958e+07	1.87361e+07	1.43192e+07	8.77454e+06	1.12272e+07	1.22808e+07	9.57345e+06	1.47355e+07	1.32386e+07	3.23988e+07	3.47146e+07	3.60906e+07	1.43778e+07	1.64176e+07	1.37954e+07	1.14487e+07	1.55936e+07	1.17534e+07	6.99354e+06	1.02051e+07	1.10819e+07	1.41807e+07
Gamma-Aminobutyric acid	1.67679e+08	1.73022e+08	1.71899e+08	9.99222e+07	1.07137e+08	1.02566e+08	1.31291e+08	1.40791e+08	1.29316e+08	1.55604e+08	1.62208e+08	1.53513e+08	9.45592e+07	1.08107e+08	9.9724e+07	1.03901e+08	1.07802e+08	1.08223e+08	1.75787e+08	1.82727e+08	1.8619e+08	9.66024e+07	1.10018e+08	1.02916e+08	1.10418e+08	1.17708e+08	1.03194e+08	1.53025e+08	1.61363e+08	1.54236e+08	1.45164e+08	1.55753e+08	1.47059e+08	1.31147e+08	1.37029e+08	1.37519e+08	1.37413e+08	1.42344e+08	1.37974e+08	1.71141e+08	1.73417e+08	1.72485e+08	1.66874e+08	1.75557e+08	1.67561e+08	1.11235e+08	1.14653e+08	1.13017e+08	1.60369e+08
Glutamate	8.70253e+07	1.26764e+08	1.2405e+08	1.41039e+08	1.78063e+08	1.5455e+08	1.26334e+08	1.50839e+08	1.1776e+08	1.73835e+08	1.88164e+08	1.96612e+08	1.62087e+08	1.93346e+08	1.79451e+08	1.55949e+08	1.59767e+08	1.59502e+08	8.11906e+07	1.08225e+08	1.23573e+08	6.73911e+07	1.03357e+08	5.18392e+07	1.08181e+08	1.29151e+08	9.07681e+07	1.50359e+08	1.70657e+08	1.71958e+08	1.09456e+08	1.21642e+08	9.93499e+07	1.74874e+08	1.90926e+08	1.77041e+08	1.37609e+08	1.74913e+08	1.73151e+08	3.32197e+08	3.79497e+08	3.52323e+08	1.09003e+08	1.33988e+08	9.77128e+07	7.62837e+07	1.0912e+08	1.27628e+08	1.37528e+08
riboflavin	4.11158e+06	4.71805e+06	5.04027e+06	2.42455e+06	3.8689e+06	2.70211e+06	926409	4.53874e+06	3.82824e+06	5.67033e+06	6.93742e+06	7.48714e+06	5.45582e+06	5.7928e+06	5.5754e+06	1.85116e+06	5.21821e+06	3.60742e+06	2.2774e+06	5.21028e+06	3.6942e+06	5.18818e+06	5.85205e+06	4.6632e+06	5.41727e+06	7.34197e+06	8.58865e+06	4.73307e+07	4.94631e+07	4.87966e+07	3.66485e+06	5.99315e+06	6.35581e+06	6.64646e+06	7.89085e+06	6.07537e+06	916487	3.00553e+06	4.56175e+06	1.5352e+06	3.54255e+06	4.68579e+06	1.26544e+06	2.71305e+06	4.14512e+06	9.80033e+06	1.0378e+07	9.99711e+06	1.48654e+06
1-Methylnicotinamide	2.84431e+07	3.20718e+07	2.65639e+07	4.12853e+07	4.53902e+07	4.54196e+07	7.93295e+07	8.04281e+07	8.13608e+07	3.21356e+07	3.60688e+07	3.54278e+07	2.37658e+07	2.81592e+07	2.61078e+07	2.86279e+06	5.92345e+06	552889	4.2029e+07	4.3631e+07	4.4044e+07	4.61342e+07	4.823e+07	4.94311e+07	3.14882e+07	3.50237e+07	2.97618e+07	3.73739e+07	4.06255e+07	3.49117e+07	4.6259e+07	5.09843e+07	4.70349e+07	2.92396e+07	3.52571e+07	3.20485e+07	5.05707e+07	5.44708e+07	5.58219e+07	7.67121e+06	1.02117e+07	1.00695e+07	3.68871e+07	3.90169e+07	3.95575e+07	3.26627e+07	3.46817e+07	3.34746e+07	1.15414e+07
hypoxanthine	2.95114e+07	3.95142e+07	4.16434e+07	5.27763e+07	6.03128e+07	6.7045e+07	1.05886e+08	1.10168e+08	1.05915e+08	4.64593e+07	5.06882e+07	4.97288e+07	3.45959e+07	4.01036e+07	2.92188e+07	2.5333e+06	1.3338e+07	6.55391e+06	5.74557e+07	6.10472e+07	5.77321e+07	5.63888e+07	6.60131e+07	5.68702e+07	3.52953e+07	4.94264e+07	4.23235e+07	5.49423e+07	6.052e+07	5.52287e+07	6.46677e+07	6.82869e+07	6.99549e+07	3.30223e+07	4.62653e+07	3.88854e+07	7.118e+07	7.82927e+07	7.28273e+07	6.98357e+06	2.01461e+07	1.49603e+07	4.60977e+07	5.2919e+07	5.84875e+07	4.85766e+07	5.24929e+07	5.12289e+07	1.60849e+07
1-Methyladenosine	2.4269e+07	2.63567e+07	2.60463e+07	2.89261e+07	3.02124e+07	3.07972e+07	4.13863e+07	4.47145e+07	4.51335e+07	2.87566e+07	3.0688e+07	3.13229e+07	1.60536e+07	1.87865e+07	2.01136e+07	2.34147e+07	2.78227e+07	2.50185e+07	1.83993e+07	1.90938e+07	1.94068e+07	1.6639e+07	2.05605e+07	1.83565e+07	1.24319e+07	1.56692e+07	1.64797e+07	3.1963e+07	3.30801e+07	3.20567e+07	3.71219e+07	3.97368e+07	3.87177e+07	2.32516e+07	2.61227e+07	2.69094e+07	2.92499e+07	3.25352e+07	3.47226e+07	3.58237e+07	3.78531e+07	3.48819e+07	2.20371e+07	2.74288e+07	2.50193e+07	4.06731e+07	4.25239e+07	4.26395e+07	2.79034e+07
creatinine	1.60269e+08	1.65655e+08	1.62161e+08	1.38668e+08	1.50237e+08	1.45821e+08	2.27469e+08	2.46524e+08	2.27394e+08	1.11912e+08	1.31544e+08	1.28135e+08	1.42964e+08	1.52583e+08	1.51575e+08	1.36758e+08	1.4749e+08	1.35219e+08	1.13788e+08	1.22133e+08	1.18103e+08	8.96213e+07	1.01948e+08	1.03604e+08	1.22682e+08	1.40243e+08	1.43045e+08	1.3813e+08	1.40317e+08	1.36316e+08	1.2053e+08	1.34655e+08	1.44247e+08	1.08405e+08	1.30573e+08	1.19799e+08	1.70998e+08	1.87223e+08	1.6831e+08	1.37635e+08	1.50137e+08	1.50929e+08	1.31241e+08	1.36553e+08	1.28587e+08	1.42632e+08	1.4488e+08	1.44073e+08	1.19544e+08
Deoxyribose 1-phosphate_neg	5.67513e+06	6.17415e+06	5.45201e+06	2.45999e+06	2.65824e+06	2.62647e+06	3.48297e+06	3.88662e+06	3.95607e+06	4.22082e+06	4.72792e+06	4.97649e+06	2.55494e+06	3.11771e+06	2.88884e+06	2.91999e+06	3.27694e+06	2.66916e+06	6.04118e+06	6.11478e+06	6.16669e+06	2.95704e+06	3.31718e+06	2.86851e+06	2.97584e+06	3.3304e+06	2.7085e+06	5.52415e+06	5.73216e+06	5.47351e+06	4.14247e+06	4.15225e+06	4.14835e+06	3.99339e+06	4.24525e+06	3.79182e+06	4.56374e+06	4.59118e+06	4.54202e+06	3.53391e+06	3.92782e+06	3.18083e+06	4.50421e+06	4.92535e+06	5.13025e+06	3.76268e+06	4.05667e+06	4.12114e+06	5.08761e+06
D-glucuronic acid	2.31344e+08	2.71228e+08	1.98956e+08	1.25724e+08	1.31541e+08	1.32969e+08	3.06699e+08	3.70958e+08	3.76599e+08	9.23891e+08	9.7096e+08	9.02782e+08	2.86771e+08	3.15633e+08	3.29453e+08	5.83795e+07	1.24994e+08	1.37278e+08	1.23694e+08	1.79701e+08	2.31345e+08	2.08834e+08	3.04609e+08	2.28425e+08	3.02197e+08	3.37478e+08	3.43661e+08	4.09925e+08	4.42546e+08	4.66205e+08	6.14585e+08	7.07135e+08	6.18983e+08	9.71067e+08	9.98067e+08	9.98974e+08	5.02978e+08	5.50457e+08	5.32805e+08	1.50778e+09	1.54562e+09	1.54074e+09	3.93337e+08	5.07831e+08	4.4933e+08	3.79352e+08	4.411e+08	4.85026e+08	3.20721e+08
L-Alanine	6.45138e+07	6.93379e+07	6.06721e+07	9.98877e+07	1.05573e+08	1.06067e+08	7.70203e+07	8.09475e+07	7.80143e+07	6.47267e+07	6.85905e+07	6.91472e+07	5.34278e+07	6.191e+07	5.63314e+07	7.23439e+07	8.04293e+07	7.80697e+07	6.66722e+07	6.97155e+07	7.0981e+07	6.81204e+07	7.22463e+07	7.23923e+07	5.41445e+07	5.78476e+07	5.26737e+07	8.42918e+07	9.10263e+07	8.27236e+07	7.87488e+07	8.40758e+07	8.68203e+07	8.82935e+07	9.16085e+07	8.8737e+07	7.63501e+07	8.05926e+07	7.37213e+07	8.91286e+07	9.24166e+07	8.99851e+07	5.69433e+07	6.07788e+07	5.53431e+07	7.68898e+07	8.39632e+07	7.62621e+07	6.30905e+07
Pipecolic acid	5.31847e+08	5.98228e+08	5.95361e+08	6.38118e+08	6.83416e+08	6.22915e+08	4.67739e+08	5.15949e+08	5.52447e+08	3.41693e+08	4.11146e+08	3.86514e+08	2.86821e+08	3.52288e+08	3.48667e+08	2.65647e+08	3.51214e+08	3.04027e+08	4.14076e+08	4.72599e+08	4.63127e+08	1.95286e+08	2.26953e+08	1.80264e+08	2.61569e+08	3.0999e+08	2.89424e+08	4.18497e+08	4.65364e+08	4.71854e+08	3.82026e+08	4.21941e+08	3.63266e+08	3.05507e+08	3.81191e+08	3.3927e+08	3.4637e+08	3.6467e+08	3.62336e+08	3.20939e+08	3.25302e+08	3.29207e+08	4.85055e+08	5.10299e+08	5.10497e+08	3.64509e+08	4.00994e+08	4.15095e+08	3.93628e+08
sarcosine	6.46979e+07	6.81412e+07	6.41407e+07	1.04121e+08	1.07273e+08	1.10241e+08	8.13353e+07	8.49199e+07	8.35981e+07	6.53198e+07	7.37705e+07	7.20704e+07	5.2271e+07	5.97627e+07	5.53562e+07	7.08123e+07	8.05081e+07	7.66624e+07	6.22525e+07	6.66394e+07	7.01147e+07	7.32281e+07	7.5578e+07	7.29358e+07	5.193e+07	5.52429e+07	5.39576e+07	9.38179e+07	9.42399e+07	9.43043e+07	8.84499e+07	9.59178e+07	8.74667e+07	9.89398e+07	1.03009e+08	1.05203e+08	7.66552e+07	8.25094e+07	8.04475e+07	9.15133e+07	9.65373e+07	9.76993e+07	5.99599e+07	6.57101e+07	5.73843e+07	8.77999e+07	9.40613e+07	8.55359e+07	7.35538e+07
N-Acetylglutamic acid (1)_neg	4.82888e+06	5.83343e+06	6.01576e+06	5.95982e+06	6.32521e+06	6.23249e+06	1.63997e+06	1.88935e+06	1.94791e+06	7.42846e+06	8.30679e+06	8.39293e+06	3.06235e+06	4.01646e+06	3.9843e+06	5.41549e+06	6.32517e+06	6.44075e+06	8.76693e+06	9.99336e+06	9.69447e+06	1.87627e+06	2.77979e+06	2.96025e+06	2.92917e+06	3.29584e+06	2.98228e+06	3.35482e+06	3.50387e+06	3.38274e+06	912675	1.23485e+06	721093	762644	1.19994e+06	868591	857508	2.25059e+06	1.56856e+06	284859	1.20471e+06	768578	4.25133e+06	4.56658e+06	4.13167e+06	753078	1.26192e+06	772484	2.85789e+06
Imidazole	5.02275e+08	5.03624e+08	5.04102e+08	5.88733e+08	6.21185e+08	6.05384e+08	4.43861e+08	4.65536e+08	4.72716e+08	4.40194e+08	4.53094e+08	4.45039e+08	4.35941e+08	4.69891e+08	4.50821e+08	4.61413e+08	4.66189e+08	4.57371e+08	4.45269e+08	4.69372e+08	4.65686e+08	4.35681e+08	4.46421e+08	4.51427e+08	4.57425e+08	4.69908e+08	4.60844e+08	4.18356e+08	4.44003e+08	4.25785e+08	4.40423e+08	4.48125e+08	4.42724e+08	4.93354e+08	5.18319e+08	4.91732e+08	5.28894e+08	5.52942e+08	5.55928e+08	4.77876e+08	4.95581e+08	4.68033e+08	4.57248e+08	4.64737e+08	4.66733e+08	5.05244e+08	5.25913e+08	5.25055e+08	5.07137e+08
methylsuccinic acid	1.02503e+07	1.24178e+07	1.08817e+07	2.00337e+07	2.18371e+07	1.87612e+07	8.22459e+06	1.11505e+07	8.91353e+06	5.27151e+06	8.18213e+06	7.52094e+06	9.69002e+06	1.23608e+07	1.07499e+07	1.19365e+07	1.26344e+07	1.28324e+07	2.48879e+06	5.16686e+06	5.7818e+06	1.12524e+07	1.4604e+07	1.36229e+07	7.90172e+06	9.34416e+06	8.30443e+06	2.12553e+07	2.52877e+07	2.32767e+07	2.29971e+07	2.52399e+07	2.09936e+07	1.24277e+07	1.40215e+07	1.17591e+07	1.3407e+07	1.57539e+07	1.72747e+07	1.2586e+07	1.5801e+07	1.40405e+07	8.18459e+06	1.044e+07	1.11131e+07	1.61568e+07	1.84498e+07	1.87145e+07	1.46848e+07
Metanephrine	6.2263e+07	6.57848e+07	5.90501e+07	4.2067e+06	6.6346e+06	4.00807e+06	2.56337e+08	2.6155e+08	2.57658e+08	5.61038e+06	1.02868e+07	3.40691e+06	4.89585e+07	5.28801e+07	4.89552e+07	1.09058e+08	1.13944e+08	1.12462e+08	5.198e+06	7.4703e+06	5.98943e+06	9.85646e+07	1.04246e+08	9.67275e+07	6.07116e+07	6.38252e+07	6.62104e+07	9.24306e+07	9.61459e+07	9.90012e+07	1.53609e+07	1.93026e+07	1.22925e+07	1.0379e+08	1.10438e+08	1.05819e+08	1.85174e+08	1.90112e+08	1.84519e+08	6.60418e+07	6.99502e+07	6.94547e+07	2.66505e+06	7.65241e+06	8.7101e+06	380040	9.03281e+06	5.0648e+06	1.09293e+08
palmitic acid_neg	3.55032e+08	4.13756e+08	3.85836e+08	2.35877e+08	2.62987e+08	2.69155e+08	3.02518e+08	3.2003e+08	3.08961e+08	4.92719e+08	5.16118e+08	4.76331e+08	2.72602e+08	2.85247e+08	2.83457e+08	2.54905e+08	3.05232e+08	2.89339e+08	3.27974e+08	3.56989e+08	3.45295e+08	3.35478e+08	3.93454e+08	3.58324e+08	2.54147e+08	2.92035e+08	2.86119e+08	3.44731e+08	3.8154e+08	3.81662e+08	2.15301e+08	2.63386e+08	2.62492e+08	4.94593e+08	5.02408e+08	5.08397e+08	2.10411e+08	2.26065e+08	2.35917e+08	2.08758e+08	2.55242e+08	2.1143e+08	3.09042e+08	3.2088e+08	3.09941e+08	2.48202e+08	2.94269e+08	2.60352e+08	2.85939e+08
histamine	3.55443e+07	3.62384e+07	3.61668e+07	1.11198e+08	1.11998e+08	1.11553e+08	3.79811e+06	4.81807e+06	5.21141e+06	2.65835e+06	3.66213e+06	2.50205e+06	298886	1.22161e+06	1.0701e+06	1.47106e+06	1.8445e+06	2.21223e+06	802428	1.61661e+06	1.26402e+06	1.47747e+06	2.58197e+06	2.07219e+06	2.64259e+06	2.7647e+06	2.55208e+06	1.14448e+06	1.91256e+06	2.37606e+06	1.91558e+06	2.66257e+06	1.85634e+06	3.13265e+06	4.55811e+06	3.57261e+06	773675	2.09203e+06	1.55754e+06	2.54796e+06	3.64761e+06	2.24428e+06	2.48005e+06	3.59566e+06	3.06014e+06	1.97968e+06	3.2432e+06	2.1392e+06	3.25448e+06
AICA-riboside	1.03837e+07	1.1361e+07	1.02238e+07	3.96762e+06	6.56213e+06	5.13884e+06	2.04009e+07	2.17505e+07	2.03277e+07	1.35165e+07	1.5271e+07	1.27318e+07	7.93789e+06	1.04756e+07	9.27573e+06	7.86729e+06	9.66396e+06	9.38132e+06	6.9965e+06	1.00942e+07	8.62586e+06	6.81993e+06	7.61131e+06	6.7079e+06	6.40547e+06	7.55021e+06	5.91838e+06	6.04338e+06	7.78153e+06	5.59972e+06	8.04664e+06	8.85149e+06	7.52991e+06	7.4072e+06	8.94106e+06	7.98757e+06	1.05192e+07	1.23669e+07	1.32009e+07	8.2668e+06	1.02736e+07	8.30473e+06	5.988e+06	7.87198e+06	7.00744e+06	1.56452e+07	1.64625e+07	1.60482e+07	5.99775e+06
[truncated: 41 more columns]
