# Supplementary figures and images for: Metabolomics analysis reveals a potential role SARS-CoV-2 viral proteins in the regulation/perturbation of metabolic pathways associated with altered plasma metabolites in COVID-19 patients
Source: Research Square preprint supplement (doi:10.21203/rs.3.rs-1707562/v1), 2022-06-24

# TERPENOID BACKBONE BIOSYNTHESIS

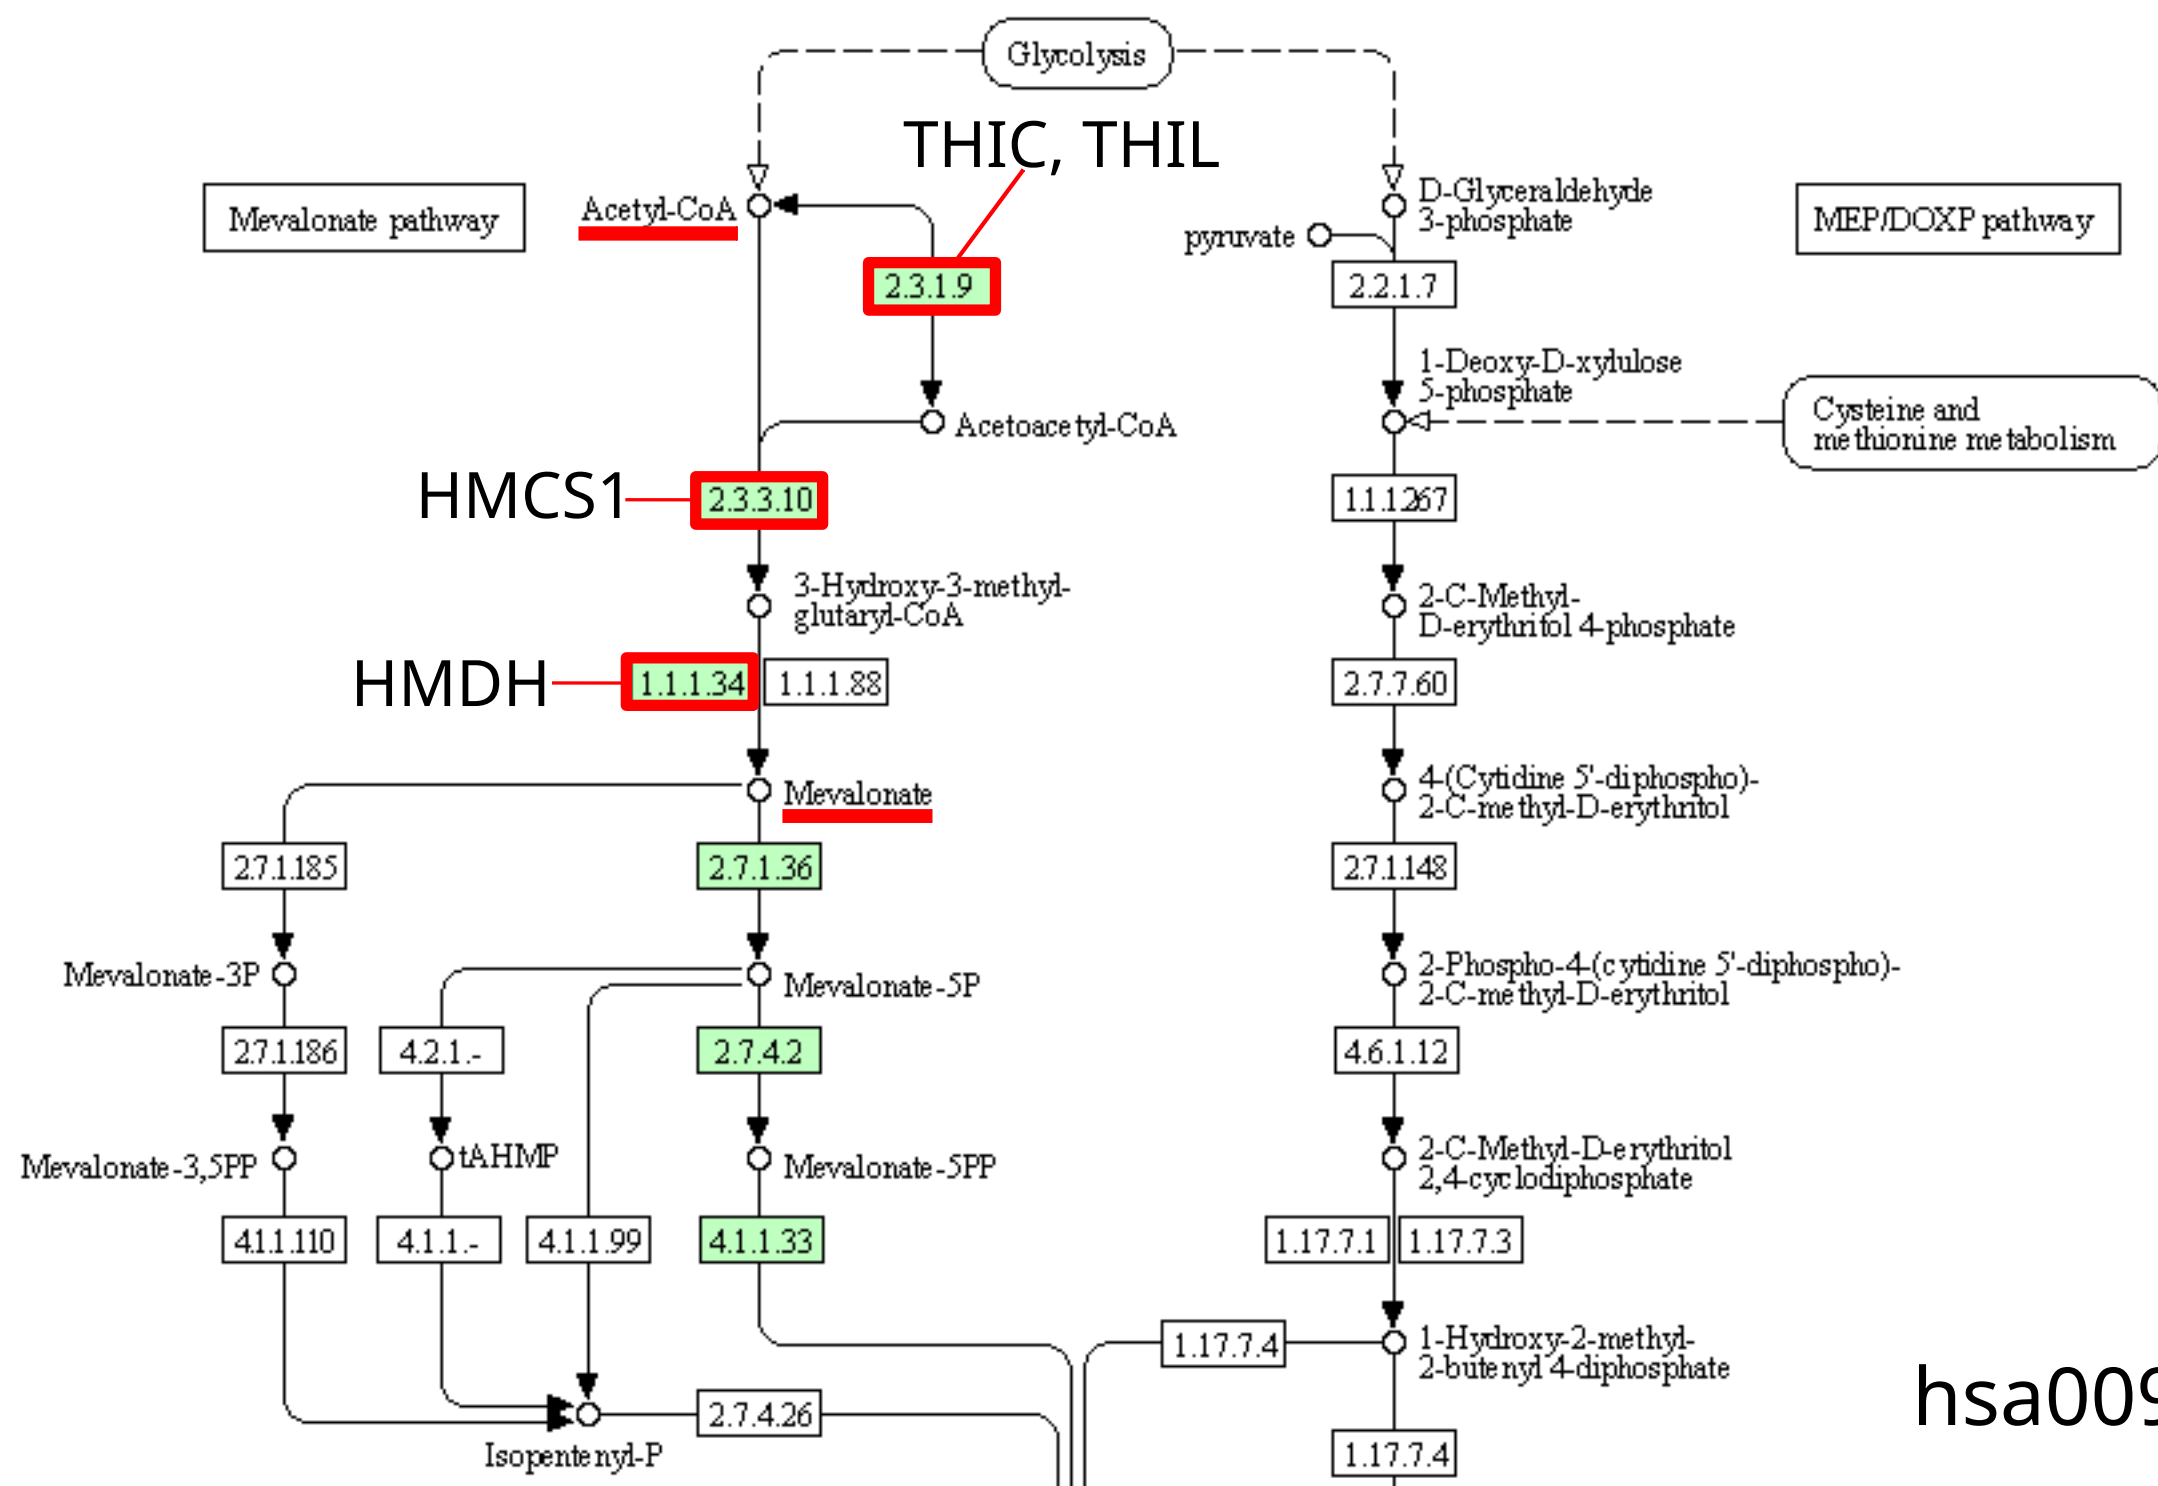

hsa00900

Supplement: Supplementary file 1 [file b45a9f4607074f53b2bf4d44.pdf]
